# Supplementary material
Source: PubMed Central journal article supplement (PMC6369414)
Supplement: mmc1.pdf [file mmc1.pdf]

**Biophysical Journal, Volume 116**

**Supplemental Information**

**$\beta$ -Branched Amino Acids Stabilize Specific Conformations of Cyclic  
Hexapeptides**

**Ashleigh E. Cummings, Jiayuan Miao, Diana P. Slough, Sean M. McHugh, Joshua A. Kritzer, and Yu-Shan Lin**

## **I. Simulation data tables and figures**

**Table S1.** Cumulative variance associated to the first three eigenvectors for the cyclic hexapeptides analyzed in the paper.

| <b>Name</b> | <b>Sequence</b> | <b>% Variance of the first 3 PC's</b> |
|-------------|-----------------|---------------------------------------|
| P7          | VVGGVG          | 67.4%                                 |
| P6          | VVGVGG          | 60.9%                                 |
| V1A         | AVGGVG          | 70.3%                                 |
| V2A         | VAGGVG          | 64.0%                                 |
| V5A         | VVGGAG          | 68.5%                                 |
| V1I         | IVGGVG          | 66.9%                                 |
| V1L         | LVGGVG          | 72.3%                                 |
| V1T         | TVGGVG          | 68.0%                                 |
| V1S         | SVGGVG          | 68.5%                                 |

**Table S2.** Thermodynamic decomposition between cluster 1 and cluster 2 for P7, V1A, V1I, V1L; and between cluster 1 and cluster 3 for V1T, V1S. S1 and S2 are two sets of parallel simulations beginning with different initial structures. The error of  $\Delta G$  is the standard error of the mean (SEM) estimated from the five neutral replicas in BE-META simulations.  $-T\Delta S_p^{\text{conf}}$  is calculated using maximum information spanning tree (MIST) approach, which provides a tight estimation of the upper bound of the entropy. The error of  $-T\Delta S$  is propagated from  $\Delta G$  and  $\Delta H$  according to the relation:  $-T\Delta S = \Delta G - \Delta H$ . The error of  $-T\Delta S_W$  is propagated from  $-T\Delta S$  according to the relation:  $-T\Delta S_W = (-T\Delta S) - (-T\Delta S_p^{\text{conf}})$ . The errors of the remaining quantities are SEM calculated from 60,000 frames sampled from the additional MD simulations.

|            |            | $\Delta G$ | $\Delta H$ | $-T\Delta S$ | $\Delta H_p^{\text{wp}}$ | $\Delta H_{\text{rest}}$ | $-T\Delta S_p^{\text{conf}}$ | $-T\Delta S_W$ | $\Delta H_p^{\text{L}}$ | $\Delta H_p^{\text{EE(SR+1,4)}}$ | $\Delta H_p^{\text{bond}}$ | $\Delta H_p^{\text{angle}}$ | $\Delta H_p^{\text{hb}}$ | $\Delta H_p^{\text{imp}}$ | $\Delta H_p^{\text{L}}$ | $\Delta H_p^{\text{EE(SR)}}$ | $\Delta H_p^{\text{EE(LR)}}$ |             |
|------------|------------|------------|------------|--------------|--------------------------|--------------------------|------------------------------|----------------|-------------------------|----------------------------------|----------------------------|-----------------------------|--------------------------|---------------------------|-------------------------|------------------------------|------------------------------|-------------|
| <b>S1</b>  | <b>P7</b>  | VGGVG      | 75.3%      | 0.00         | 0.00                     | 0.00                     | 0.00                         | 0.00           | 0.00                    | 0.00                             | 0.00                       | 0.00                        | 0.00                     | 0.00                      | 0.00                    | 0.00                         | 0.00                         |             |
|            |            | VGGVG      | 2.6%       | 8.38±0.14    | 12.17±1.29               | -3.79±1.30               | 46.77±0.16                   | -34.60±1.28    | -14.72                  | 10.93±1.30                       | 4.21±0.06                  | 38.23±0.11                  | -0.25±0.07               | 0.20±0.11                 | 4.42±0.05               | -0.03±0.02                   | 0.49±1.28                    | -23.93±2.01 |
|            | <b>V1A</b> | AVGGVG     | 47.2%      | 0.00         | 0.00                     | 0.00                     | 0.00                         | 0.00           | 0.00                    | 0.00                             | 0.00                       | 0.00                        | 0.00                     | 0.00                      | 0.00                    | 0.00                         | 0.00                         | 0.00        |
|            |            | AVGGVG     | 10.2%      | 3.84±0.13    | 2.09±1.31                | 1.75±1.32                | 49.99±0.15                   | -47.99±1.31    | -6.00                   | 7.75±1.32                        | -2.73±0.06                 | 49.68±0.11                  | -0.15±0.07               | 1.72±0.10                 | 1.82±0.05               | -0.34±0.02                   | 6.33±1.31                    | -24.30±2.05 |
|            | <b>V1I</b> | IVGGVG     | 77.8%      | 0.00         | 0.00                     | 0.00                     | 0.00                         | 0.00           | 0.00                    | 0.00                             | 0.00                       | 0.00                        | 0.00                     | 0.00                      | 0.00                    | 0.00                         | 0.00                         | 0.00        |
|            |            | IVGGVG     | 2.9%       | 8.22±0.06    | 10.67±1.23               | -2.45±1.23               | 51.16±0.16                   | -49.49±1.23    | -15.97                  | 13.52±1.23                       | 7.26±0.06                  | 39.25±0.11                  | -0.03±0.07               | 0.55±0.11                 | 4.20±0.05               | -0.08±0.02                   | 0.69±1.23                    | -25.62±1.92 |
| <b>V1L</b> | LVGGVG     | 32.4%      | 0.00       | 0.00         | 0.00                     | 0.00                     | 0.00                         | 0.00           | 0.00                    | 0.00                             | 0.00                       | 0.00                        | 0.00                     | 0.00                      | 0.00                    | 0.00                         | 0.00                         |             |
|            | LVGGVG     | 14.4%      | 2.03±0.07  | 1.81±1.22    | 0.22±1.23                | 62.74±0.17               | -60.33±1.22                  | -9.15          | 9.37±1.23               | 5.61±0.06                        | 58.33±0.12                 | -0.67±0.07                  | -3.18±0.11               | 0.51±0.06                 | 0.13±0.02               | -2.91±1.22                   | -21.26±1.91                  | -36.76±0.12 |
| <b>V1T</b> | TVGGVG     | 63.8%      | 0.00       | 0.00         | 0.00                     | 0.00                     | 0.00                         | 0.00           | 0.00                    | 0.00                             | 0.00                       | 0.00                        | 0.00                     | 0.00                      | 0.00                    | 0.00                         | 0.00                         |             |
|            | TVGGVG     | 4.1%       | 6.87±0.05  | 5.71±1.23    | 1.16±1.23                | 61.27±0.16               | -60.33±1.22                  | -12.71         | 13.87±1.23              | -0.20±0.06                       | 54.64±0.13                 | -0.01±0.07                  | 1.60±0.11                | 5.50±0.05                 | -0.06±0.02              | 3.10±1.23                    | -29.01±1.92                  | -29.65±0.12 |
| <b>V1S</b> | SVGGVG     | 44.2%      | 0.00       | 0.00         | 0.00                     | 0.00                     | 0.00                         | 0.00           | 0.00                    | 0.00                             | 0.00                       | 0.00                        | 0.00                     | 0.00                      | 0.00                    | 0.00                         | 0.00                         |             |
|            | SVGGVG     | 7.6%       | 4.40±0.10  | 1.08±1.23    | 3.32±1.23                | 53.79±0.17               | -50.33±1.22                  | -5.75          | 9.07±1.23               | -1.26±0.06                       | 52.11±0.13                 | -0.07±0.07                  | 1.65±0.10                | 1.49±0.05                 | -0.21±0.02              | 4.09±1.23                    | -28.95±1.92                  | -27.77±0.12 |
| <b>S2</b>  | <b>P7</b>  | VGGVG      | 77.7%      | 0.00         | 0.00                     | 0.00                     | 0.00                         | 0.00           | 0.00                    | 0.00                             | 0.00                       | 0.00                        | 0.00                     | 0.00                      | 0.00                    | 0.00                         | 0.00                         |             |
|            |            | VGGVG      | 1.4%       | 9.96±0.20    | 10.87±1.25               | -0.91±1.26               | 47.13±0.16                   | -36.28±1.24    | -15.54                  | 14.64±1.26                       | 3.71±0.06                  | 37.80±0.12                  | -0.05±0.07               | 0.64±0.11                 | 5.13±0.05               | -0.08±0.02                   | 0.78±1.24                    | -23.33±1.94 |
|            | <b>V1A</b> | AVGGVG     | 47.6%      | 0.00         | 0.00                     | 0.00                     | 0.00                         | 0.00           | 0.00                    | 0.00                             | 0.00                       | 0.00                        | 0.00                     | 0.00                      | 0.00                    | 0.00                         | 0.00                         | 0.00        |
|            |            | AVGGVG     | 8.3%       | 4.38±0.13    | 4.58±1.23                | -0.20±1.23               | 50.40±0.15                   | -48.92±1.22    | -5.91                   | 5.72±1.23                        | -2.47±0.06                 | 50.24±0.11                  | -0.07±0.07               | 1.66±0.10                 | 1.39±0.05               | -0.36±0.02                   | 1.98±1.23                    | -18.14±1.92 |
|            | <b>V1I</b> | IVGGVG     | 81.1%      | 0.00         | 0.00                     | 0.00                     | 0.00                         | 0.00           | 0.00                    | 0.00                             | 0.00                       | 0.00                        | 0.00                     | 0.00                      | 0.00                    | 0.00                         | 0.00                         | 0.00        |
|            |            | IVGGVG     | 1.8%       | 9.46±0.16    | 8.87±1.24                | 0.59±1.25                | 50.85±0.16                   | -41.99±1.24    | -15.33                  | 15.92±1.25                       | 7.63±0.06                  | 39.20±0.11                  | 0.02±0.07                | 0.22±0.11                 | 3.86±0.05               | -0.08±0.02                   | -0.21±1.24                   | -26.26±1.94 |
| <b>V1L</b> | LVGGVG     | 36.0%      | 0.00       | 0.00         | 0.00                     | 0.00                     | 0.00                         | 0.00           | 0.00                    | 0.00                             | 0.00                       | 0.00                        | 0.00                     | 0.00                      | 0.00                    | 0.00                         | 0.00                         |             |
|            | LVGGVG     | 13.7%      | 2.40±0.05  | 2.10±1.27    | 0.30±1.27                | 62.29±0.16               | -60.13±1.25                  | -8.68          | 8.98±1.27               | 6.30±0.06                        | 60.04±0.12                 | -0.70±0.07                  | -3.93±0.11               | 0.48±0.05                 | 0.10±0.02               | -1.21±1.27                   | -23.26±1.99                  | -35.72±0.12 |
| <b>V1T</b> | TVGGVG     | 64.1%      | 0.00       | 0.00         | 0.00                     | 0.00                     | 0.00                         | 0.00           | 0.00                    | 0.00                             | 0.00                       | 0.00                        | 0.00                     | 0.00                      | 0.00                    | 0.00                         | 0.00                         |             |
|            | TVGGVG     | 3.8%       | 7.06±0.10  | 5.02±1.24    | 2.04±1.24                | 60.96±0.16               | -59.94±1.25                  | -12.78         | 14.81±1.24              | -0.14±0.06                       | 54.39±0.13                 | -0.27±0.07                  | 1.53±0.11                | 5.51±0.05                 | -0.06±0.02              | 3.36±1.24                    | -29.99±1.94                  | -29.31±0.12 |
| <b>V1S</b> | SVGGVG     | 45.1%      | 0.00       | 0.00         | 0.00                     | 0.00                     | 0.00                         | 0.00           | 0.00                    | 0.00                             | 0.00                       | 0.00                        | 0.00                     | 0.00                      | 0.00                    | 0.00                         | 0.00                         |             |
|            | SVGGVG     | 8.3%       | 4.21±0.03  | 0.84±1.25    | 3.36±1.25                | 53.20±0.17               | -51.35±1.25                  | -5.59          | 8.95±1.25               | -1.32±0.06                       | 52.09±0.14                 | -0.12±0.07                  | 0.88±0.10                | 1.88±0.05                 | -0.21±0.02              | 4.42±1.24                    | -27.77±1.94                  | -29.00±0.13 |

**Table S3.** The population percentages and structures of the top three clusters from BE-META simulations using the amber99sb force field. S1 and S2 are two sets of simulations beginning with different initial structures. Types I, II and II'  $\beta$  turns are colored red, green and blue, respectively.

| CP        | VGGVG          |                | AVGGVG          |                 | IVGGVG          |                 | LVGGVG          |                 | TVGGVG          |                 | SVGGVG          |                 |
|-----------|----------------|----------------|-----------------|-----------------|-----------------|-----------------|-----------------|-----------------|-----------------|-----------------|-----------------|-----------------|
|           | S1             | S2             | S1              | S2              | S1              | S2              | S1              | S2              | S1              | S2              | S1              | S2              |
| Cluster 1 | VGGVG<br>22.9% | VGGVG<br>27.2% | AVGGVG<br>31.4% | AVGGVG<br>26.8% | IVGGVG<br>25.6% | IVGGVG<br>31.3% | LVGGVG<br>36.7% | LVGGVG<br>31.2% | TVGGVG<br>34.9% | TVGGVG<br>29.1% | SVGGVG<br>32.0% | SVGGVG<br>26.3% |
| Cluster 2 | VGGVG<br>12.6% | VGGVG<br>9.7%  | AVGGVG<br>9.9%  | AVGGVG<br>12.6% | IVGGVG<br>25.5% | IVGGVG<br>14.1% | LVGGVG<br>9.9%  | LVGGVG<br>11.1% | TVGGVG<br>10.5% | TVGGVG<br>9.7%  | SVGGVG<br>8.7%  | SVGGVG<br>12.6% |
| Cluster 3 | VGGVG<br>10.5% | VGGVG<br>8.7%  | AVGGVG<br>6.3%  | AVGGVG<br>6.8%  | IVGGVG<br>6.1%  | IVGGVG<br>8.2%  | LVGGVG<br>7.6%  | LVGGVG<br>10.1% | TVGGVG<br>8.6%  | TVGGVG<br>9.2%  | SVGGVG<br>6.7%  | SVGGVG<br>7.0%  |

**cyclo-(VVGGVG)**

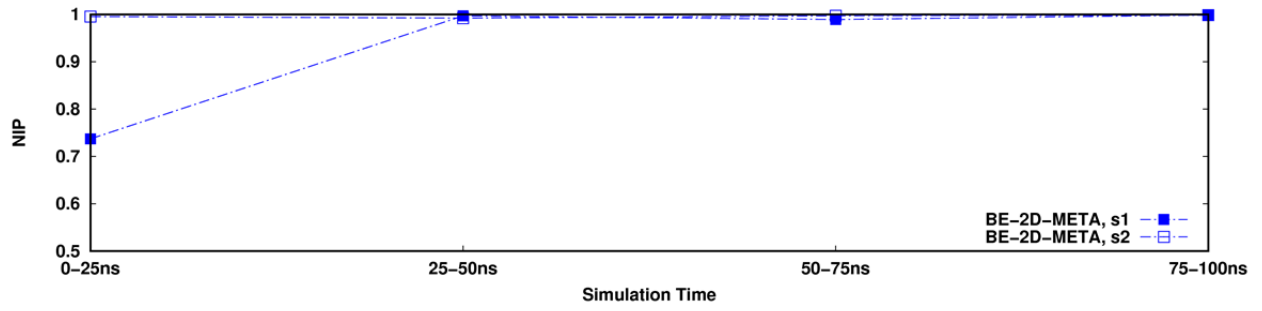

**cyclo-(VVGVGG)**

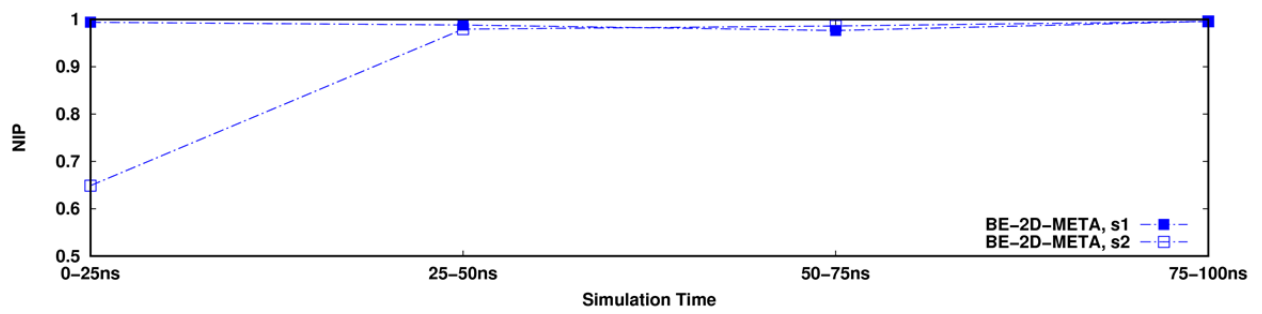

**cyclo-(AVGGVG)**

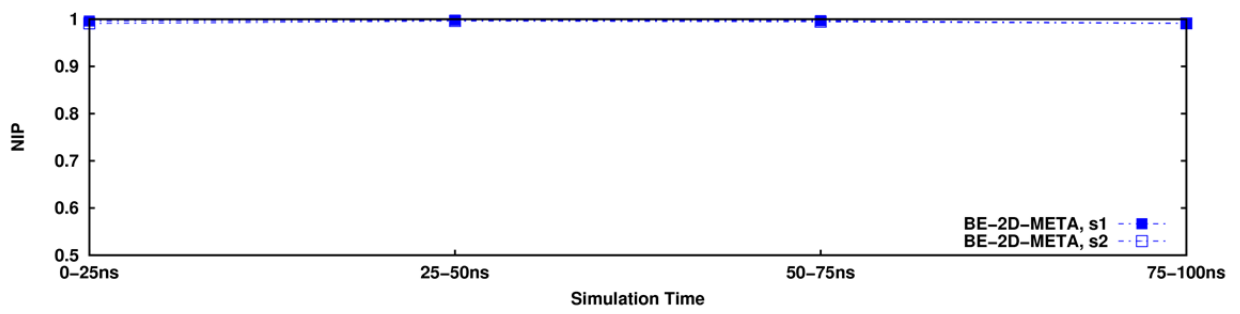

**cyclo-(VAGGVG)**

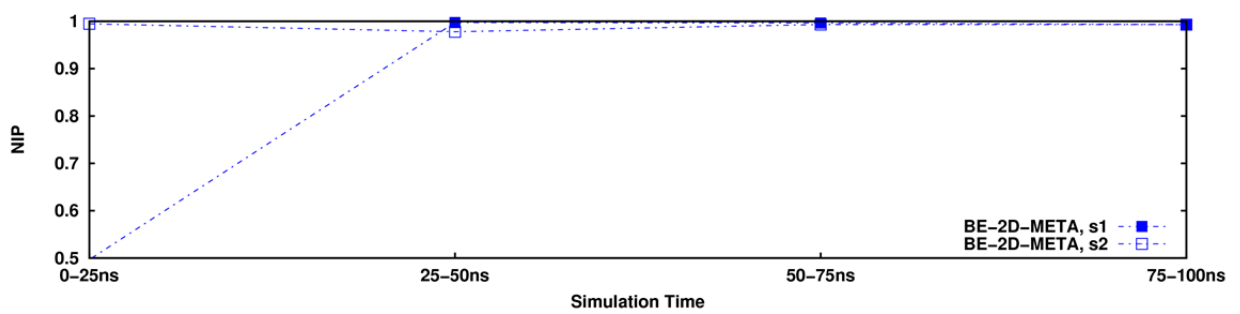

### cyclo-(VVGAG)

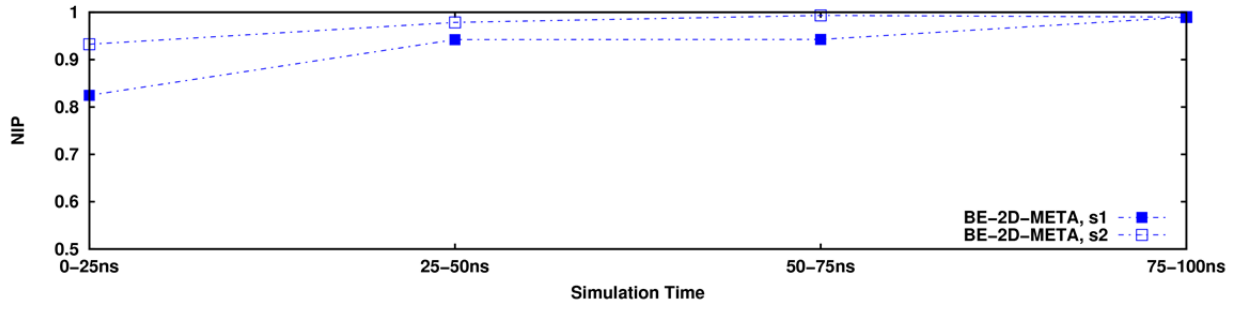

### cyclo-(IVGVGG)

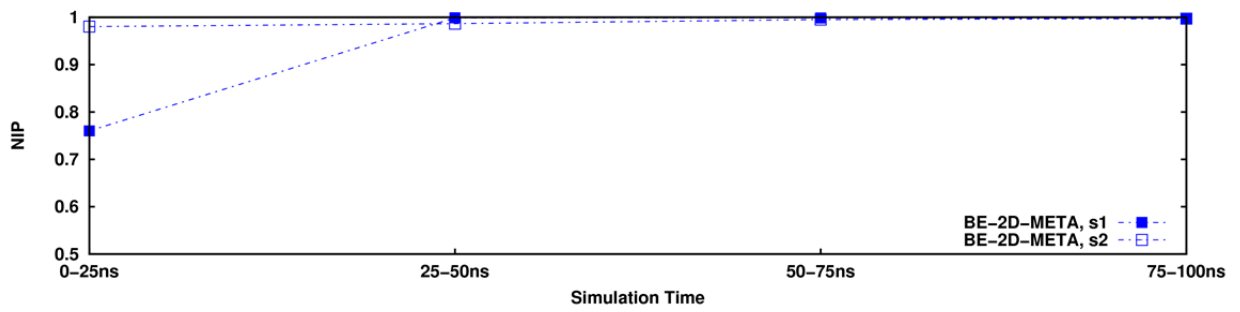

### cyclo-(LVGGVG)

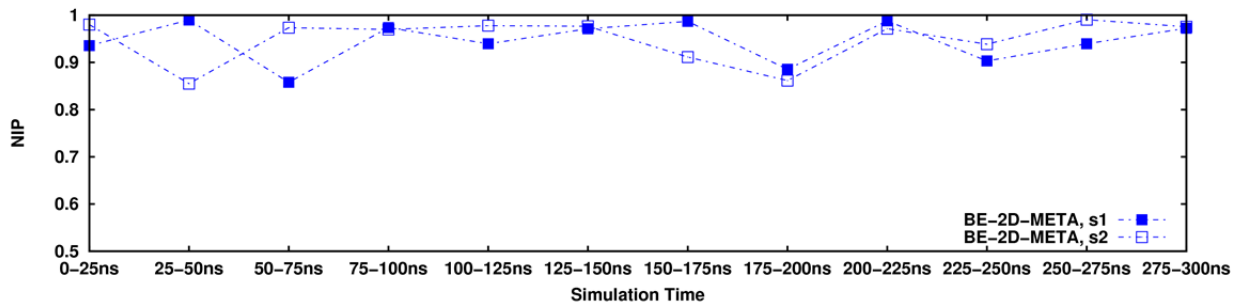

### cyclo-(TVGVGG)

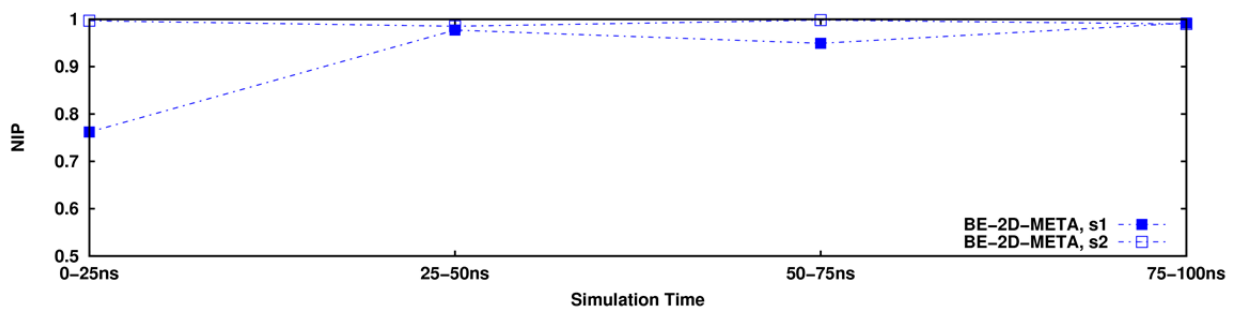

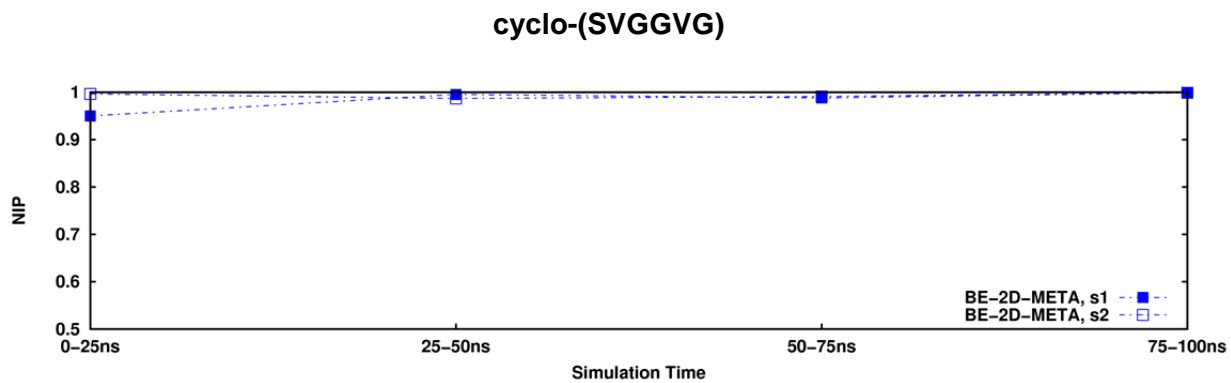

**Figure S1.** NIP figures of all cyclic hexapeptides analyzed in the paper.

P7

Simulated annealing starting from initial structure #1

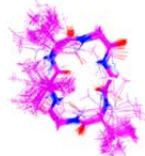

Simulated annealing starting from initial structure #2

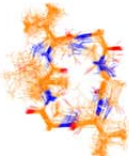

Number of violations of the predicted top cluster

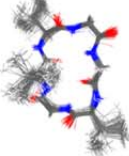

Violations

| Res # | Res name 1 | Atom 1 | Res # | Res name 2 | Atom 2 | Upper/Lower | Range of violations |
|-------|------------|--------|-------|------------|--------|-------------|---------------------|
| 25    | 2          | VAL    | H     | 1          | VAL    | HB 3.7 0.0  | 3.889-4.432         |
| 11    | 3          | GLY    | H     | 2          | VAL    | HA 3.2 0.0  | 3.660-3.991         |
| 10    | 4          | GLY    | H     | 1          | VAL    | HGA 4.9 0.0 | 5.033-9.234         |
| 5     | 5          | VAL    | H     | 5          | VAL    | HB 3.8 0.0  | 3.804-3.929         |
| 5     | 2          | VAL    | H     | 2          | VAL    | HB 3.6 0.0  | 3.663-3.721         |
| 5     | 2          | VAL    | H     | 1          | VAL    | HA 3.5 0.0  | 3.568-3.588         |
| 3     | 6          | GLY    | H     | 5          | VAL    | HA 3.2 0.0  | 3.234-3.624         |
| 1     | 3          | GLY    | H     | 4          | GLY    | H 4.2 0.0   | 4.300-4.326         |

Violations

| Res # | Res name 1 | Atom 1 | Res # | Res name 2 | Atom 2 | Upper/Lower | Range of violations |
|-------|------------|--------|-------|------------|--------|-------------|---------------------|
| 26    | 2          | VAL    | H     | 1          | VAL    | HB 3.7 0.0  | 3.785-4.638         |
| 20    | 4          | GLY    | H     | 1          | VAL    | HGA 4.9 0.0 | 5.138-8.182         |
| 19    | 2          | VAL    | H     | 1          | VAL    | HA 3.5 0.0  | 3.535-3.621         |
| 18    | 2          | VAL    | H     | 2          | VAL    | HB 3.6 0.0  | 3.655-3.760         |
| 12    | 3          | GLY    | H     | 2          | VAL    | HA 3.2 0.0  | 3.232-3.630         |
| 9     | 3          | GLY    | H     | 4          | GLY    | H 4.2 0.0   | 4.264-4.536         |
| 6     | 6          | GLY    | H     | 5          | VAL    | HA 3.2 0.0  | 3.437-3.568         |
| 4     | 5          | VAL    | H     | 5          | VAL    | HB 3.8 0.0  | 3.803-3.873         |

Violations

| Res # | Res name 1 | Atom 1 | Res # | Res name 2 | Atom 2 | Upper/Lower | Range of violations |
|-------|------------|--------|-------|------------|--------|-------------|---------------------|
| 16    | 2          | VAL    | H     | 1          | VAL    | HB 3.7 0.0  | 3.890-3.902         |
| 1     | 2          | VAL    | H     | 2          | VAL    | HB 3.6 0.0  | 3.656-3.768         |
| 1     | 1          | VAL    | HA    | 1          | VAL    | HB 3.1 0.0  | 3.111               |
| 1     | 4          | GLY    | H     | 1          | VAL    | HGA 4.9 0.0 | 5.123               |

| Res # | Dihedral | Upper   | Lower        | Range of violations                      |
|-------|----------|---------|--------------|------------------------------------------|
| 45    | 5        | VAL (φ) | -90.0 -150.0 | -89.814 to -87.417                       |
| 17    | 1        | VAL (φ) | -90.0 -150.0 | -150.980 to -150.079; -89.998 to -88.458 |
| 1     | 2        | VAL (φ) | -30.0 -90.0  | -90.784                                  |

| Res # | Dihedral | Upper   | Lower        | Range of violations                      |
|-------|----------|---------|--------------|------------------------------------------|
| 57    | 5        | VAL (φ) | -90.0 -150.0 | -89.924 to -87.489                       |
| 8     | 1        | VAL (φ) | -90.0 -150.0 | -151.061 to -150.220; -89.676 to -88.021 |
| 3     | 2        | VAL (φ) | -30.0 -90.0  | -90.586 to -90.279                       |

\*First column: # of the violations out of 100 structures

Ramachandran Plots

100 simulated annealing structures starting from S1

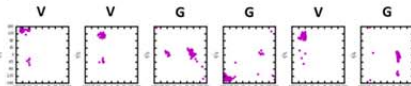

100 simulated annealing structures starting from S2

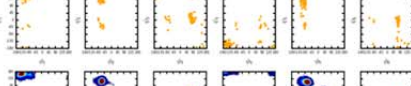

Cluster 1 from BE-META simulation

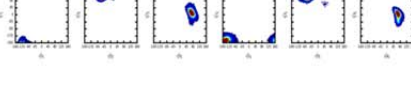

P6

Simulated annealing starting from initial structure #1

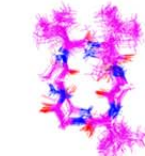

Simulated annealing starting from initial structure #2

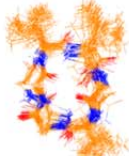

Number of violations of the predicted top cluster

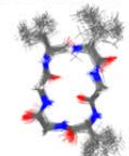

Violations

| Res # | Res name 1 | Atom 1 | Res # | Res name 2 | Atom 2 | Upper/Lower | Range of violations |
|-------|------------|--------|-------|------------|--------|-------------|---------------------|
| 31    | 2          | VAL    | H     | 2          | VAL    | HB 3.8 0.0  | 3.805-3.987         |
| 28    | 3          | GLY    | H     | 2          | VAL    | HA 3.4 0.0  | 3.424-3.620         |
| 21    | 3          | GLY    | H     | 2          | VAL    | H 4.4 0.0   | 4.405-4.583         |
| 17    | 5          | GLY    | H     | 6          | GLY    | H 4.2 0.0   | 4.212-4.545         |
| 13    | 5          | GLY    | H     | 4          | VAL    | HA 3.4 0.0  | 3.412-3.528         |
| 13    | 4          | VAL    | H     | 4          | VAL    | HB 3.7 0.0  | 3.702-3.840         |
| 5     | 2          | VAL    | H     | 6          | GLY    | HGA 5.2 0.0 | 5.286-5.679         |
| 1     | 1          | VAL    | H     | 1          | VAL    | HB 3.8 0.0  | 3.804-3.913         |
| 1     | 1          | VAL    | H     | 2          | VAL    | H 4.0 0.0   | 4.508               |

Violations

| Res # | Res name 1 | Atom 1 | Res # | Res name 2 | Atom 2 | Upper/Lower | Range of violations |
|-------|------------|--------|-------|------------|--------|-------------|---------------------|
| 33    | 2          | VAL    | H     | 2          | VAL    | HB 3.8 0.0  | 3.823-3.961         |
| 29    | 3          | GLY    | H     | 2          | VAL    | HA 3.4 0.0  | 3.457-3.610         |
| 28    | 3          | GLY    | H     | 2          | VAL    | H 4.4 0.0   | 4.400-4.658         |
| 22    | 5          | GLY    | H     | 6          | GLY    | H 4.2 0.0   | 4.280-4.725         |
| 21    | 5          | GLY    | H     | 4          | VAL    | HA 3.4 0.0  | 3.410-3.610         |
| 16    | 4          | VAL    | H     | 4          | VAL    | HB 3.7 0.0  | 3.700-3.932         |
| 10    | 1          | VAL    | H     | 1          | VAL    | HB 3.8 0.0  | 3.803-3.860         |
| 5     | 2          | VAL    | H     | 6          | GLY    | HGA 5.2 0.0 | 5.219-5.641         |
| 1     | 1          | VAL    | H     | 2          | VAL    | H 4.0 0.0   | 4.323               |

Violations

| Res # | Res name 1 | Atom 1 | Res # | Res name 2 | Atom 2 | Upper/Lower | Range of violations |
|-------|------------|--------|-------|------------|--------|-------------|---------------------|
| 66    | 3          | GLY    | H     | 2          | VAL    | HA 3.4 0.0  | 3.420-3.749         |
| 27    | 2          | VAL    | H     | 2          | VAL    | HB 3.6 0.0  | 3.602-4.060         |
| 5     | 4          | VAL    | H     | 4          | VAL    | HB 3.7 0.0  | 3.702-3.844         |
| 4     | 1          | VAL    | H     | 1          | VAL    | HB 3.8 0.0  | 3.817-3.916         |
| 1     | 3          | GLY    | H     | 2          | VAL    | HB 4.7 0.0  | 4.716               |

| Res # | Dihedral | Upper   | Lower        | Range of violations |
|-------|----------|---------|--------------|---------------------|
| 3     | 2        | VAL (φ) | -90.0 -150.0 | -89.249; -89.120    |

| Res # | Dihedral | Upper   | Lower        | Range of violations |
|-------|----------|---------|--------------|---------------------|
| 2     | 2        | VAL (φ) | -90.0 -150.0 | -150.587; -89.932   |

| Res # | Dihedral | Upper   | Lower        | Range of violations |
|-------|----------|---------|--------------|---------------------|
| 13    | 2        | VAL (φ) | -90.0 -150.0 | -88.873 to -68.875  |

Ramachandran Plots

100 simulated annealing structures starting from S1

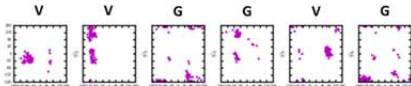

100 simulated annealing structures starting from S2

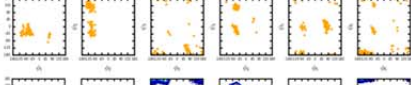

Cluster 1 from BE-META simulation

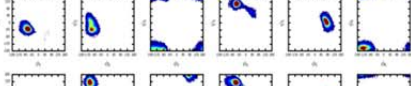

Cluster 2 from BE-META simulation

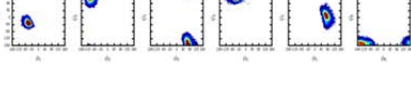

First cluster from BE-META simulation



Second cluster from BE-META simulation

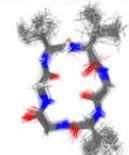

Violations

| Res # | Res name 1 | Atom 1 | Res # | Res name 2 | Atom 2 | Upper/Lower | Range of violations |
|-------|------------|--------|-------|------------|--------|-------------|---------------------|
| 28    | 3          | GLY    | H     | 2          | VAL    | H 4.4 0.0   | 4.402-4.663         |
| 6     | 4          | VAL    | H     | 4          | VAL    | HB 3.7 0.0  | 3.707-3.871         |
| 21    | 2          | VAL    | H     | 2          | VAL    | HB 3.6 0.0  | 3.673-3.999         |
| 2     | 1          | VAL    | H     | 1          | VAL    | HB 3.8 0.0  | 3.876-3.904         |

| Res # | Dihedral | Upper   | Lower        | Actual/dihedral range |
|-------|----------|---------|--------------|-----------------------|
| 6     | 2        | VAL (φ) | -90.0 -150.0 | -88.329 to -80.327    |



### AVGGVG

Simulated annealing starting from initial structure #1

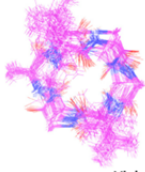

Simulated annealing starting from initial structure #2

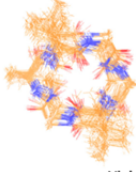

Number of violations of the predicted top cluster

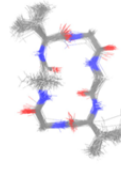

#### Violations

| Res # | Res name 1 | Atom 1 | Res # | Res name 2 | Atom 2 | Upper | Lower | Range of violations |             |
|-------|------------|--------|-------|------------|--------|-------|-------|---------------------|-------------|
| 99    | 6          | GLY    | H     | 1          | ALA    | H     | 4.2   | 0.0                 | 4.281-4.677 |
| 99    | 3          | GLY    | H     | 4          | GLY    | H     | 4.1   | 0.0                 | 4.227-4.671 |
| 131   | 1          | ALA    | H     | 2          | VAL    | H     | 4.3   | 0.0                 | 4.308-4.708 |
| 27    | 2          | VAL    | H     | 2          | VAL    | HB    | 3.7   | 0.0                 | 3.705-3.981 |
| 21    | 6          | GLY    | H     | 5          | VAL    | HA    | 3.2   | 0.0                 | 3.213-3.604 |
| 22    | 4          | GLY    | H     | 5          | VAL    | HA    | 4.3   | 0.0                 | 4.308-4.593 |
| 21    | 3          | GLY    | H     | 2          | VAL    | HA    | 3.2   | 0.0                 | 3.213-3.574 |
| 5     | 3          | GLY    | H     | 2          | VAL    | HGR   | 4.3   | 0.0                 | 4.485-4.865 |
| 2     | 6          | GLY    | H     | 5          | VAL    | HGR   | 4.3   | 0.0                 | 4.537-4.670 |
| 1     | 2          | VAL    | H     | 1          | ALA    | HBB   | 4.1   | 0.0                 | 4.115       |
| 1     | 1          | ALA    | H     | 6          | GLY    | HAB   | 3.6   | 0.0                 | 3.808       |

#### Violations

| Res # | Res name 1 | Atom 1 | Res # | Res name 2 | Atom 2 | Upper | Lower | Range of violations |             |
|-------|------------|--------|-------|------------|--------|-------|-------|---------------------|-------------|
| 97    | 6          | GLY    | H     | 1          | ALA    | H     | 4.2   | 0.0                 | 4.235-4.679 |
| 145   | 3          | GLY    | H     | 4          | GLY    | H     | 4.1   | 0.0                 | 4.174-5.187 |
| 30    | 1          | ALA    | H     | 2          | VAL    | H     | 4.3   | 0.0                 | 4.327-4.684 |
| 20    | 2          | VAL    | H     | 2          | VAL    | HB    | 3.7   | 0.0                 | 3.701-3.999 |
| 18    | 4          | GLY    | H     | 5          | VAL    | H     | 4.3   | 0.0                 | 4.310-4.610 |
| 16    | 6          | GLY    | H     | 5          | VAL    | HA    | 3.2   | 0.0                 | 3.216-3.589 |
| 15    | 3          | GLY    | H     | 2          | VAL    | HA    | 3.2   | 0.0                 | 3.261-3.604 |
| 9     | 6          | GLY    | H     | 5          | VAL    | HGR   | 4.3   | 0.0                 | 4.314-4.699 |
| 2     | 2          | VAL    | H     | 1          | ALA    | HBB   | 4.1   | 0.0                 | 4.166-4.207 |
| 1     | 3          | GLY    | H     | 2          | VAL    | HGR   | 4.3   | 0.0                 | 4.684       |

#### Violations

| Res # | Res name 1 | Atom 1 | Res # | Res name 2 | Atom 2 | Upper | Lower | Range of violations |             |
|-------|------------|--------|-------|------------|--------|-------|-------|---------------------|-------------|
| 90    | 1          | ALA    | H     | 2          | VAL    | H     | 4.3   | 0.0                 | 4.302-4.775 |
| 64    | 4          | GLY    | H     | 5          | VAL    | H     | 4.3   | 0.0                 | 4.312-4.622 |
| 2     | 6          | GLY    | H     | 5          | VAL    | HGR   | 4.3   | 0.0                 | 4.541-4.576 |
| 1     | 3          | GLY    | H     | 2          | VAL    | HGR   | 4.3   | 0.0                 | 4.301       |
| 1     | 2          | VAL    | H     | 2          | VAL    | HB    | 3.7   | 0.0                 | 3.751       |

| Res # | Dihedral | Upper     | Lower | Range of violations |                    |
|-------|----------|-----------|-------|---------------------|--------------------|
| 20    | 5        | VAL (phi) | -90.0 | -150.0              | -89.886 to -87.434 |

| Res # | Dihedral | Upper     | Lower | Range of violations |                    |
|-------|----------|-----------|-------|---------------------|--------------------|
| 15    | 5        | VAL (phi) | -90.0 | -150.0              | -89.999 to -87.426 |

| Res # | Dihedral | Upper     | Lower | Range of violations |                    |
|-------|----------|-----------|-------|---------------------|--------------------|
| 90    | 5        | VAL (phi) | -90.0 | -150.0              | -89.843 to -37.581 |

### Ramachandran Plots

100 simulated annealing structures starting from S1

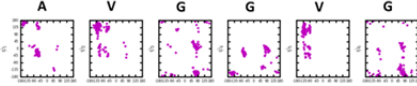

100 simulated annealing structures starting from S2

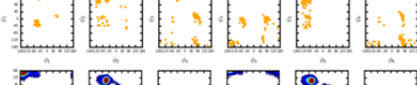

Cluster 1 from BE-META simulation

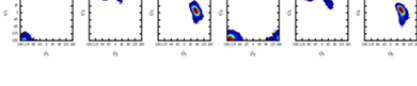

### IVGGVG

Simulated annealing starting from initial structure #1

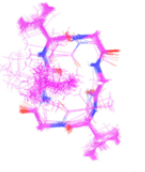

Simulated annealing starting from initial structure #2

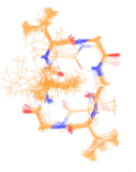

Number of violations of the predicted top cluster

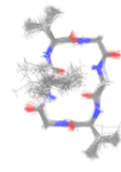

#### Violations

| Res # | Res name 1 | Atom 1 | Res # | Res name 2 | Atom 2 | Upper | Lower | Range of violations |             |
|-------|------------|--------|-------|------------|--------|-------|-------|---------------------|-------------|
| 100   | 4          | GLY    | H     | 5          | VAL    | HA    | 4.3   | 0.0                 | 4.379-5.358 |
| 93    | 1          | ILE    | H     | 1          | ILE    | HDB   | 4.3   | 0.0                 | 4.356-5.689 |
| 77    | 1          | ILE    | HA    | 1          | ILE    | HDB   | 4.4   | 0.0                 | 4.468-4.931 |
| 38    | 4          | GLY    | H     | 1          | ILE    | HDB   | 5.0   | 0.0                 | 5.003-6.357 |
| 36    | 2          | VAL    | H     | 1          | ILE    | HDB   | 4.8   | 0.0                 | 4.804-5.678 |
| 24    | 2          | VAL    | H     | 1          | ILE    | HB    | 3.7   | 0.0                 | 3.772-4.165 |
| 13    | 3          | GLY    | H     | 2          | VAL    | HA    | 3.0   | 0.0                 | 3.447-3.590 |
| 11    | 2          | VAL    | H     | 2          | VAL    | HB    | 3.5   | 0.0                 | 3.670-3.724 |
| 7     | 4          | GLY    | HAB   | 1          | ILE    | HDB   | 5.5   | 0.0                 | 5.504-6.998 |
| 7     | 4          | GLY    | H     | 1          | ILE    | HGR   | 4.4   | 0.0                 | 4.422-5.980 |
| 5     | 5          | VAL    | H     | 5          | VAL    | HB    | 3.8   | 0.0                 | 3.805-3.887 |
| 4     | 3          | GLY    | H     | 2          | VAL    | HGR   | 4.2   | 0.0                 | 4.219-4.412 |
| 4     | 2          | VAL    | H     | 1          | ILE    | HA    | 3.4   | 0.0                 | 3.501-3.604 |
| 4     | 1          | ILE    | HB    | 1          | ILE    | HDB   | 3.2   | 0.0                 | 3.318-3.861 |
| 3     | 6          | GLY    | H     | 1          | ILE    | H     | 4.3   | 0.0                 | 4.307-4.509 |
| 2     | 4          | GLY    | HAB   | 1          | ILE    | HGR   | 6.1   | 0.0                 | 6.088-7.583 |

#### Violations

| Res # | Res name 1 | Atom 1 | Res # | Res name 2 | Atom 2 | Upper | Lower | Range of violations |             |
|-------|------------|--------|-------|------------|--------|-------|-------|---------------------|-------------|
| 100   | 4          | GLY    | H     | 5          | VAL    | HA    | 4.3   | 0.0                 | 4.521-5.187 |
| 88    | 1          | ILE    | H     | 1          | ILE    | HDB   | 4.3   | 0.0                 | 4.309-5.700 |
| 81    | 1          | ILE    | HA    | 1          | ILE    | HDB   | 4.4   | 0.0                 | 4.734-4.934 |
| 33    | 4          | GLY    | H     | 1          | ILE    | HDB   | 5.0   | 0.0                 | 5.012-6.517 |
| 26    | 2          | VAL    | H     | 1          | ILE    | HDB   | 4.8   | 0.0                 | 4.806-5.698 |
| 12    | 2          | VAL    | H     | 1          | ILE    | HB    | 3.7   | 0.0                 | 3.961-4.530 |
| 9     | 3          | GLY    | H     | 2          | VAL    | HA    | 3.0   | 0.0                 | 3.509-3.607 |
| 9     | 2          | VAL    | H     | 2          | VAL    | HB    | 3.5   | 0.0                 | 3.670-3.795 |
| 8     | 4          | GLY    | HAB   | 1          | ILE    | HDB   | 5.5   | 0.0                 | 5.611-6.991 |
| 8     | 4          | GLY    | H     | 1          | ILE    | HGR   | 4.4   | 0.0                 | 4.442-6.922 |
| 4     | 2          | VAL    | H     | 1          | ILE    | HA    | 3.4   | 0.0                 | 3.578-3.635 |
| 4     | 1          | ILE    | HB    | 1          | ILE    | HDB   | 3.2   | 0.0                 | 3.311-3.841 |
| 3     | 5          | VAL    | H     | 5          | VAL    | HB    | 3.8   | 0.0                 | 3.832-3.927 |
| 2     | 6          | GLY    | H     | 1          | ILE    | H     | 4.3   | 0.0                 | 4.389-4.483 |
| 2     | 4          | GLY    | HAB   | 1          | ILE    | HGR   | 6.1   | 0.0                 | 6.324-8.267 |

#### Violations

| Res # | Res name 1 | Atom 1 | Res # | Res name 2 | Atom 2 | Upper | Lower | Range of violations |             |
|-------|------------|--------|-------|------------|--------|-------|-------|---------------------|-------------|
| 100   | 4          | GLY    | H     | 5          | VAL    | HA    | 4.3   | 0.0                 | 4.383-5.771 |
| 94    | 1          | ILE    | H     | 1          | ILE    | HDB   | 4.3   | 0.0                 | 4.328-5.676 |
| 85    | 1          | ILE    | HA    | 1          | ILE    | HDB   | 4.4   | 0.0                 | 4.439-5.214 |
| 21    | 4          | GLY    | H     | 1          | ILE    | HDB   | 5.0   | 0.0                 | 5.052-7.607 |
| 21    | 2          | VAL    | H     | 1          | ILE    | HDB   | 4.8   | 0.0                 | 4.814-5.350 |
| 13    | 4          | GLY    | HAB   | 1          | ILE    | HDB   | 5.5   | 0.0                 | 5.789-8.763 |
| 13    | 2          | VAL    | H     | 1          | ILE    | HB    | 3.7   | 0.0                 | 3.968-4.341 |
| 6     | 2          | VAL    | H     | 2          | VAL    | HB    | 3.5   | 0.0                 | 3.604-3.771 |
| 5     | 4          | GLY    | H     | 1          | ILE    | HGR   | 4.4   | 0.0                 | 4.521-6.230 |
| 3     | 3          | GLY    | H     | 2          | VAL    | HGR   | 4.2   | 0.0                 | 4.246-4.421 |

| Res # | Dihedral | Upper     | Lower | Range of violations |                                          |
|-------|----------|-----------|-------|---------------------|------------------------------------------|
| 8     | 1        | VAL (phi) | -90.0 | -150.0              | -151.848 to -150.380, -89.813 to -89.552 |
| 41    | 5        | VAL (phi) | -90.0 | -150.0              | -89.844 to -87.141                       |

| Res # | Dihedral | Upper     | Lower | Range of violations |                                          |
|-------|----------|-----------|-------|---------------------|------------------------------------------|
| 0     | 1        | VAL (phi) | -90.0 | -150.0              | -151.600 to -150.171, -89.502 to -88.596 |
| 52    | 5        | VAL (phi) | -90.0 | -150.0              | -89.993 to -87.194                       |

| Res # | Dihedral | Upper     | Lower | Range of violations |                                          |
|-------|----------|-----------|-------|---------------------|------------------------------------------|
| 26    | 1        | VAL (phi) | -90.0 | -150.0              | -176.793 to -150.696, -89.431 to -53.393 |
| 86    | 5        | VAL (phi) | -90.0 | -150.0              | -89.874 to -41.442                       |

### Ramachandran Plots

100 simulated annealing structures starting from S1

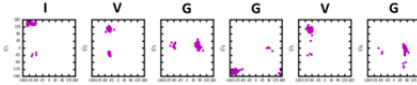

100 simulated annealing structures starting from S2

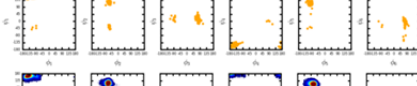

Cluster 1 from BE-META simulation

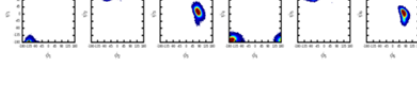

**LVGGVG**

Simulated annealing starting from initial structure #1

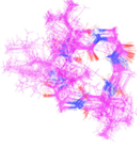

Simulated annealing starting from initial structure #2

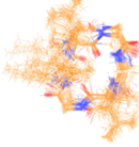

Number of violations of the predicted top cluster

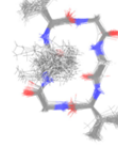

**Violations**

| Res # | Res name 1 | Atom 1 | Res # | Res name 2 | Atom 2 | Upper/Lower | Range of violations |
|-------|------------|--------|-------|------------|--------|-------------|---------------------|
| 71    | 4          | GLY    | H     | 5          | VAL    | HA          | 5.0 0.0 5.000-5.587 |
| 68    | 5          | VAL    | H     | 6          | GLY    | HAR         | 5.2 0.0 5.213-5.757 |
| 68    | 2          | VAL    | H     | 3          | GLY    | HAR         | 5.4 0.0 5.406-6.132 |
| 58    | 4          | GLY    | HAR   | 1          | LEU    | HDW         | 5.3 0.0 5.387-6.911 |
| 43    | 1          | LEU    | H     | 2          | VAL    | H           | 4.0 0.0 4.100-4.667 |
| 39    | 4          | GLY    | H     | 5          | VAL    | H           | 4.1 0.0 4.102-4.355 |
| 37    | 1          | LEU    | H     | 1          | LEU    | HBR         | 3.5 0.0 3.515-3.788 |
| 29    | 6          | GLY    | H     | 1          | LEU    | H           | 4.4 0.0 4.439-4.667 |
| 28    | 4          | GLY    | H     | 2          | VAL    | HGR         | 5.4 0.0 5.400-6.117 |
| 22    | 1          | LEU    | H     | 1          | LEU    | HDW         | 4.4 0.0 4.416-5.007 |
| 21    | 1          | LEU    | H     | 2          | VAL    | HA          | 5.5 0.0 5.500-6.747 |
| 18    | 2          | VAL    | H     | 1          | LEU    | HBR         | 4.1 0.0 4.106-4.457 |
| 12    | 2          | VAL    | H     | 2          | VAL    | HB          | 3.6 0.0 3.648-3.834 |
| 9     | 3          | GLY    | H     | 4          | GLY    | H           | 4.0 0.0 4.201-4.636 |
| 7     | 6          | GLY    | H     | 5          | VAL    | HA          | 3.1 0.0 3.199-3.539 |
| 7     | 5          | VAL    | H     | 5          | VAL    | HB          | 3.8 0.0 3.801-3.961 |
| 7     | 3          | GLY    | H     | 3          | VAL    | HA          | 3.1 0.0 3.326-3.581 |
| 3     | 6          | GLY    | H     | 5          | VAL    | HGR         | 4.3 0.0 4.441-4.612 |
| 3     | 3          | GLY    | H     | 2          | VAL    | HGR         | 4.2 0.0 4.204-4.326 |
| 1     | 3          | GLY    | H     | 2          | VAL    | H           | 5.0 0.0 5.133       |

| Res # | Dihedral | Upper   | Lower        | Range of violations |
|-------|----------|---------|--------------|---------------------|
| 25    | 5        | VAL (φ) | -90.0 -150.0 | -89.989 to -88.853  |

**Violations**

| Res # | Res name 1 | Atom 1 | Res # | Res name 2 | Atom 2 | Upper/Lower | Range of violations |
|-------|------------|--------|-------|------------|--------|-------------|---------------------|
| 67    | 4          | GLY    | H     | 5          | VAL    | HA          | 5.0 0.0 5.000-5.490 |
| 66    | 5          | VAL    | H     | 6          | GLY    | HAR         | 5.2 0.0 5.209-5.720 |
| 64    | 2          | VAL    | H     | 3          | GLY    | HAR         | 5.4 0.0 5.407-6.098 |
| 56    | 1          | LEU    | H     | 2          | VAL    | H           | 4.0 0.0 4.016-4.673 |
| 54    | 4          | GLY    | HAR   | 1          | LEU    | HDW         | 5.3 0.0 5.337-6.956 |
| 42    | 4          | GLY    | H     | 5          | VAL    | H           | 4.1 0.0 4.122-4.408 |
| 29    | 6          | GLY    | H     | 1          | LEU    | H           | 4.4 0.0 4.463-4.658 |
| 28    | 1          | LEU    | H     | 1          | LEU    | HBR         | 3.5 0.0 3.524-3.793 |
| 27    | 4          | GLY    | H     | 2          | VAL    | HGR         | 5.4 0.0 5.402-6.399 |
| 23    | 1          | LEU    | H     | 1          | LEU    | HDW         | 4.4 0.0 4.412-4.992 |
| 20    | 2          | VAL    | H     | 1          | LEU    | HBR         | 4.1 0.0 4.101-4.475 |
| 20    | 1          | LEU    | H     | 2          | VAL    | HA          | 5.5 0.0 5.504-5.826 |
| 19    | 3          | GLY    | H     | 2          | VAL    | HA          | 3.1 0.0 3.237-3.603 |
| 13    | 2          | VAL    | H     | 2          | VAL    | HB          | 3.6 0.0 3.653-3.974 |
| 10    | 6          | GLY    | H     | 5          | VAL    | HA          | 3.1 0.0 3.358-3.582 |
| 7     | 3          | GLY    | H     | 4          | GLY    | H           | 4.0 0.0 4.155-4.642 |
| 6     | 6          | GLY    | H     | 5          | VAL    | HGR         | 4.3 0.0 4.422-4.743 |
| 6     | 5          | VAL    | H     | 5          | VAL    | HB          | 3.8 0.0 3.802-3.876 |
| 1     | 3          | GLY    | H     | 2          | VAL    | HGR         | 4.2 0.0 4.270       |
| 1     | 3          | GLY    | H     | 2          | VAL    | H           | 5.0 0.0 5.225       |
| 1     | 1          | LEU    | H     | 6          | GLY    | HAR         | 3.4 0.0 3.726       |

| Res # | Dihedral | Upper   | Lower        | Range of violations |
|-------|----------|---------|--------------|---------------------|
| 23    | 5        | VAL (φ) | -90.0 -150.0 | -89.911 to -87.512  |

**Violations**

| Res # | Res name 1 | Atom 1 | Res # | Res name 2 | Atom 2 | Upper/Lower | Range of violations |
|-------|------------|--------|-------|------------|--------|-------------|---------------------|
| 99    | 1          | LEU    | H     | 2          | VAL    | H           | 4.0 0.0 4.096-4.751 |
| 98    | 5          | VAL    | H     | 6          | GLY    | HAR         | 5.2 0.0 5.201-6.103 |
| 92    | 2          | VAL    | H     | 3          | GLY    | HAR         | 5.4 0.0 5.409-6.161 |
| 91    | 4          | GLY    | H     | 5          | VAL    | H           | 4.1 0.0 4.101-4.738 |
| 68    | 4          | GLY    | H     | 5          | VAL    | HA          | 5.0 0.0 5.003-5.647 |
| 44    | 4          | GLY    | H     | 2          | VAL    | HGR         | 5.4 0.0 5.402-6.175 |
| 34    | 1          | LEU    | H     | 1          | LEU    | HBR         | 3.5 0.0 3.535-3.825 |
| 15    | 1          | LEU    | H     | 2          | VAL    | HA          | 5.5 0.0 5.505-5.858 |
| 8     | 1          | LEU    | H     | 1          | LEU    | HDW         | 4.4 0.0 4.658-5.075 |
| 6     | 4          | GLY    | HAR   | 1          | LEU    | HDW         | 5.3 0.0 5.477-6.596 |
| 4     | 3          | GLY    | H     | 2          | VAL    | HGR         | 4.2 0.0 4.215-4.933 |
| 4     | 2          | VAL    | H     | 2          | VAL    | HB          | 3.6 0.0 3.637-3.747 |
| 3     | 6          | GLY    | H     | 5          | VAL    | H           | 4.7 0.0 4.716-4.726 |
| 2     | 2          | VAL    | H     | 1          | LEU    | HBR         | 4.1 0.0 4.253-4.368 |
| 2     | 1          | LEU    | H     | 1          | LEU    | HDW         | 4.3 0.0 4.328-4.342 |
| 2     | 1          | LEU    | H     | 6          | GLY    | HAR         | 3.4 0.0 3.422-3.449 |

| Res # | Dihedral | Upper   | Lower        | Range of violations |
|-------|----------|---------|--------------|---------------------|
| 77    | 5        | VAL (φ) | -90.0 -150.0 | -89.705 to -50.748  |

**Ramachandran Plots**

100 simulated annealing structures starting from S1

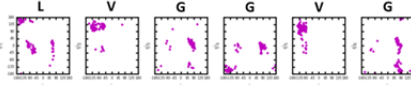

100 simulated annealing structures starting from S2

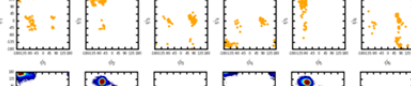

Cluster 1 from BE-META simulation

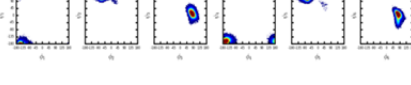

**TVGGVG**

Simulated annealing starting from initial structure #1

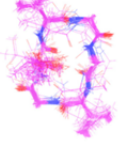

Simulated annealing starting from initial structure #2

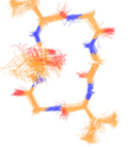

Number of violations of the predicted top cluster

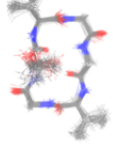

**Violations**

| Res # | Res name 1 | Atom 1 | Res # | Res name 2 | Atom 2 | Upper/Lower | Range of violations |
|-------|------------|--------|-------|------------|--------|-------------|---------------------|
| 23    | 4          | GLY    | HAR   | 1          | THR    | HGR         | 5.6 0.0 5.631-8.020 |
| 21    | 2          | VAL    | H     | 1          | THR    | HB          | 3.6 0.0 3.790-4.462 |
| 16    | 2          | VAL    | H     | 2          | VAL    | HB          | 3.5 0.0 3.445-3.938 |
| 10    | 6          | GLY    | H     | 5          | VAL    | HA          | 3.4 0.0 3.536-3.624 |
| 9     | 5          | VAL    | H     | 5          | VAL    | HB          | 3.7 0.0 3.724-3.941 |
| 4     | 2          | VAL    | H     | 1          | THR    | HA          | 3.5 0.0 3.599-3.656 |
| 4     | 2          | VAL    | H     | 1          | THR    | H           | 4.6 0.0 4.609-4.646 |
| 3     | 3          | GLY    | H     | 2          | VAL    | HGR         | 4.2 0.0 4.319-4.395 |
| 3     | 1          | THR    | H     | 1          | THR    | HGR         | 4.1 0.0 4.392-4.660 |
| 2     | 3          | GLY    | H     | 4          | GLY    | H           | 3.8 0.0 4.385-4.484 |
| 1     | 6          | GLY    | H     | 5          | VAL    | HGR         | 4.6 0.0 4.608       |
| 1     | 5          | VAL    | H     | 4          | GLY    | HAR         | 3.5 0.0 3.572       |
| 1     | 5          | VAL    | H     | 4          | GLY    | H           | 4.7 0.0 4.819       |

| Res # | Dihedral | Upper   | Lower        | Range of violations           |
|-------|----------|---------|--------------|-------------------------------|
| 18    | 1        | THR (φ) | -90.0 -150.0 | -151.143 to -150.022, -89.061 |
| 67    | 5        | VAL (φ) | -90.0 -150.0 | -89.931 to -87.039            |

**Violations**

| Res # | Res name 1 | Atom 1 | Res # | Res name 2 | Atom 2 | Upper/Lower | Range of violations |
|-------|------------|--------|-------|------------|--------|-------------|---------------------|
| 17    | 4          | GLY    | HAR   | 1          | THR    | HGR         | 5.6 0.0 5.646-6.744 |
| 17    | 2          | VAL    | H     | 1          | THR    | HB          | 3.6 0.0 3.707-4.044 |
| 11    | 6          | GLY    | H     | 5          | VAL    | HA          | 3.4 0.0 3.493-3.608 |
| 11    | 2          | VAL    | H     | 2          | VAL    | HB          | 3.5 0.0 3.641-3.830 |
| 6     | 5          | VAL    | H     | 5          | VAL    | HB          | 3.7 0.0 3.735-3.856 |
| 2     | 2          | VAL    | H     | 1          | THR    | H           | 4.6 0.0 4.621-4.627 |
| 1     | 3          | GLY    | H     | 4          | GLY    | H           | 3.8 0.0 4.308       |

| Res # | Dihedral | Upper   | Lower        | Range of violations           |
|-------|----------|---------|--------------|-------------------------------|
| 10    | 1        | THR (φ) | -90.0 -150.0 | -152.027 to -150.312, -89.718 |
| 65    | 5        | VAL (φ) | -90.0 -150.0 | -89.975 to -86.881            |

**Violations**

| Res # | Res name 1 | Atom 1 | Res # | Res name 2 | Atom 2 | Upper/Lower | Range of violations |
|-------|------------|--------|-------|------------|--------|-------------|---------------------|
| 53    | 2          | VAL    | H     | 1          | THR    | HB          | 3.6 0.0 3.601-4.164 |
| 10    | 4          | GLY    | HAR   | 1          | THR    | HGR         | 5.6 0.0 5.604-6.564 |
| 9     | 2          | VAL    | H     | 1          | THR    | H           | 4.6 0.0 4.609-4.777 |
| 1     | 3          | GLY    | H     | 2          | VAL    | HGR         | 4.2 0.0 4.319       |
| 1     | 2          | VAL    | H     | 2          | VAL    | HB          | 3.5 0.0 3.731       |
| 1     | 1          | THR    | H     | 1          | THR    | HGR         | 4.1 0.0 4.567       |

| Res # | Dihedral | Upper   | Lower        | Range of violations           |
|-------|----------|---------|--------------|-------------------------------|
| 37    | 1        | THR (φ) | -90.0 -150.0 | -175.136 to -150.161, -87.840 |
| 91    | 5        | VAL (φ) | -90.0 -150.0 | -87.369 to -82.814            |

**Ramachandran Plots**

100 simulated annealing structures starting from S1

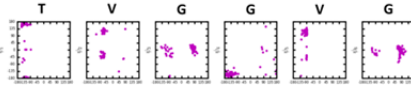

100 simulated annealing structures starting from S2

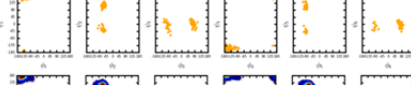

Cluster 1 from BE-META simulation

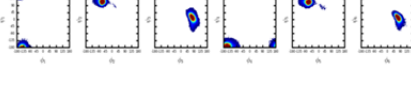

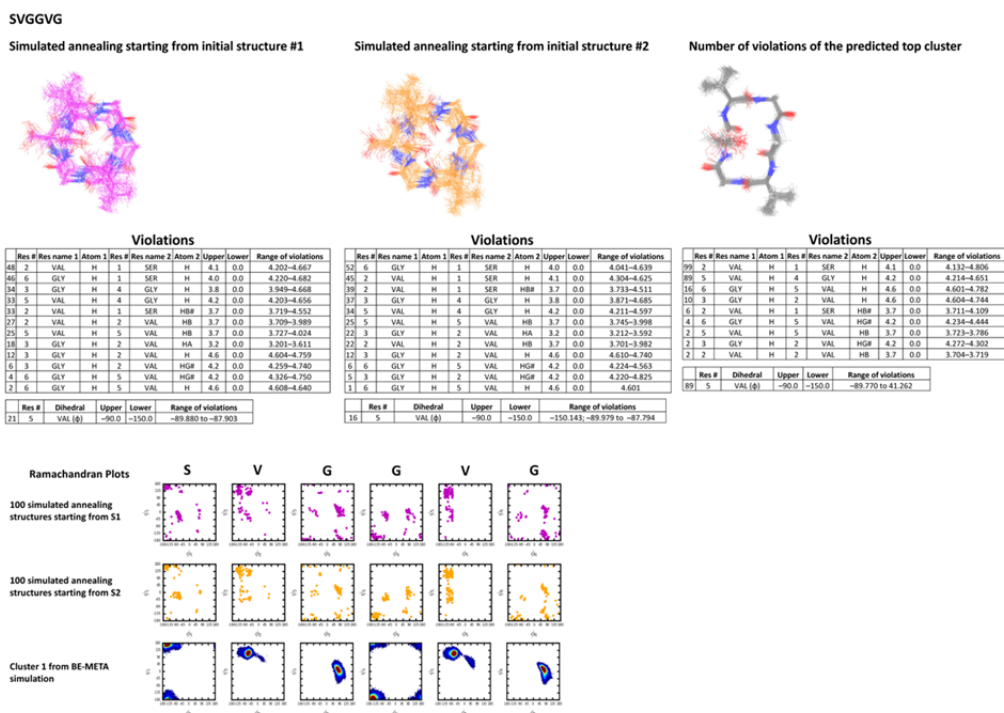

**Figure S2.** Simulated annealing results of P7, P6, V1A, V1I, V1L, V1T, and V1S using the distance and dihedral restraints derived from the experimental NOEs and  $J$ -couplings, along with the number of violations of the top clusters from the BE-META simulations. Throughout the simulated annealing protocol, NOE-based distance restraints (**Tables S6, S9, S12, S15, S18, S21, and S24**) were applied to the peptide with a force constant of 1,000 kJ/mol/rad<sup>2</sup> with the lower bounds changed to 0 Å. When there is degeneracy, the longer or shorter NOE-based distance restraints were kept in the simulated annealing simulations. From the  $J$ -coupling values, additional restraints are placed on the dihedral angles. For each CP, two different initial structures, S1 and S2, were first energy minimized in vacuum. Next, beginning with the minimized structure, 100 simulations were performed with different initial velocities and each replica was annealed from 300 K to 800 K in vacuum for 200 ps in an NVT ensemble. After annealing, each replica was solvated using pre-equilibrated water molecules. The box dimensions were chosen such that the minimum distance between the box walls and any atom of the CP was 1.0 nm. The entire system was then energy minimized using the steepest descent algorithm to remove any bad contacts. Next, the system underwent a 500 ps NVT equilibration at 300 K. Lastly, the system was annealed from 300 K to 500 K and then subsequently down to 5K over 1 ns in an NPT ensemble. The temperature was regulated using the  $v$ -rescale thermostat, with a coupling time constant of 0.1 ps. The pressure was regulated using the Berendsen barostat, with a time coupling constant of 2.0 ps and isothermal compressibility of  $4.5 \times 10^{-5}$  bar<sup>-1</sup>. The leapfrog algorithm with an integration time step of 2 fs was used to evolve the dynamics of the system. The LINCS algorithm was used to constrain all peptide bonds containing hydrogen to their equilibration values. For vacuum simulation steps, all non-bonded (electrostatics and van der Waals) interaction cutoffs were set to 999.0 nm and the neighbor list was only constructed once and never updated. For simulation steps in solvent, all non-bonded interactions as well as neighbor searching were truncated at 1.0 nm. Long-range electrostatics beyond the 1.0 nm were calculated using the particle mesh Ewald (PME) method with a Fourier spacing of 0.12 nm and an interpolation order of 4. To account for truncation of the Lennard-Jones interactions, a long-range analytic dispersion correction was applied to both energy and pressure. After all simulation steps, the final frames from each of the 100 trajectories were used to calculate distance and dihedral violations.

| (A)       | $TS_P^{\text{conf}}_{\text{self}} \text{ (kJ/mol)}$ |         |          | $TS_P^{\text{conf}}_{\text{mutual}} \text{ (kJ/mol)}$ | $TS_P^{\text{conf}} \text{ (kJ/mol)}$ |
|-----------|-----------------------------------------------------|---------|----------|-------------------------------------------------------|---------------------------------------|
|           | Bond                                                | Angle   | Dihedral |                                                       |                                       |
| Cluster 1 | -488.89                                             | -257.90 | -78.42   | 32.90                                                 | -858.11                               |
| Cluster 2 | -488.86                                             | -257.52 | -70.37   | 32.21                                                 | -848.96                               |

(B) V1L

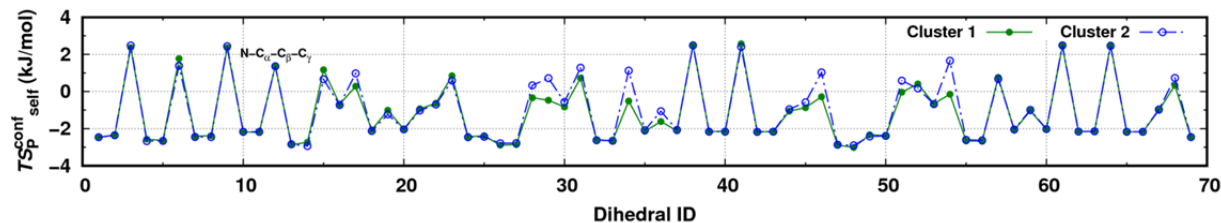

(C) V1I

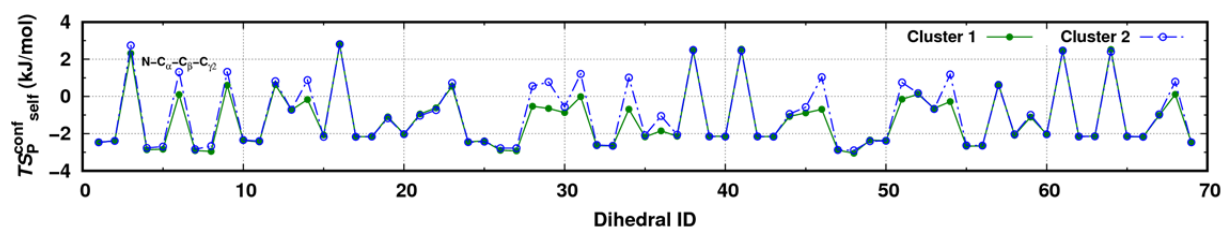

(D)

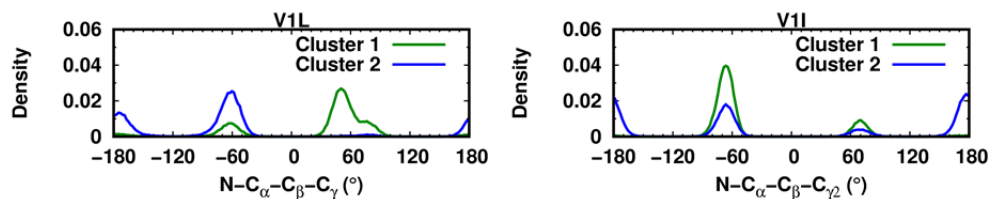

(E)

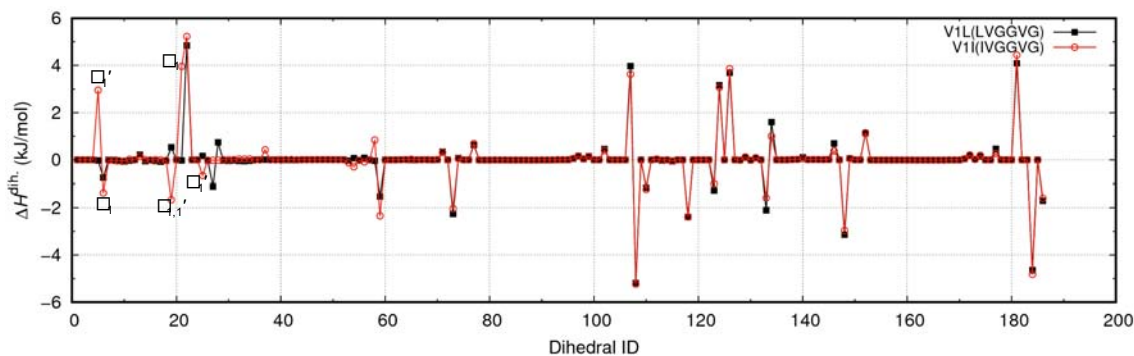

**Figure S3.** (A) The configurational entropy of V1L.  $TS_P^{\text{conf}} = TS_P^{\text{conf}}_{\text{self}} - TS_P^{\text{conf}}_{\text{mutual}}$ . (B) The configurational self-entropy for each dihedral degree of freedom of V1L. (C) The configurational self-entropy for each dihedral degree of freedom of V1I. Note that the dihedrals shown here were the chosen  $n-3$  independent torsional degrees of freedom in the internal coordinate system of the molecule used in the PARENT program. (D) The distributions of the  $N-C_\alpha-C_\beta-C_\gamma$  ( $\chi_1$ ) dihedral of the first residue for V1L (dihedral 12) and the distribution of  $N-C_\alpha-C_\beta-C_{\gamma_2}$  of the first residue for V1I (dihedral 6). (E) Decomposition of  $\Delta H_P^{\text{dih.}}$  into contributions of each dihedral for V1L and V1I. The major contributions to  $\Delta H_P^{\text{dih.}}$  come from dihedrals 5, 6, 19, 21, and 25, which are just the dihedrals  $\phi$ ,  $\phi$ ,  $\chi_1'$ ,  $\psi$ , and  $\psi'$  of the first residue.

## II. NMR data tables and spectra

**Table S4.** NOEs for P7, cyclo-(VVGGVG).

| Coordinate 1 | Assignment 1 | Coordinate 2 | Assignment 2 |
|--------------|--------------|--------------|--------------|
| 9.07         | 3Gly-NH      | 3.77         | 3Gly-Haa     |
| 9.07         | 3Gly-NH      | 4.14         | 3Gly-Hab     |
| 8.97         | 6Gly-NH      | 3.74         | 6Gly-Haa     |
| 8.97         | 6Gly-NH      | 4.13         | 6Gly-Hab     |
| 8.15         | 4Gly-NH      | 3.65         | 4Gly-Haa     |
| 8.65         | 5Val-NH      | 4.15         | 5Val-Ha      |
| 8.38         | 2Val-NH      | 3.90         | 2Val-Ha      |
| 8.15         | 4Gly-NH      | 4.34         | 4Gly-Hab     |
| 7.39         | 1Val-NH      | 4.47         | 1Val-Ha      |
| 8.66         | 5Val-NH      | 2.05         | 5Val-Hb      |
| 8.37         | 2Val-NH      | 1.98         | 2Val-Hb      |
| 7.39         | 1Val-NH      | 2.20         | 1Val-Hb      |
| 8.66         | 5Val-NH      | 0.96         | 5Val-Hga     |
| 8.37         | 2Val-NH      | 0.93         | 2Val-Hga     |
| 7.39         | 1Val-NH      | 0.69         | 1Val-Hga     |
| 7.39         | 1Val-NH      | 0.87         | 1Val-Hgb     |
| 8.37         | 2Val-NH      | 1.03         | 2Val-Hgb     |
| 4.47         | 1Val-Ha      | 2.19         | 1Val-Hb      |
| 4.15         | 5Val-Ha      | 2.05         | 5Val-Hb      |
| 3.90         | 2Val-Ha      | 1.98         | 2Val-Hb      |
| 3.90         | 2Val-Ha      | 0.93         | 2Val-Hga     |
| 3.90         | 2Val-Ha      | 1.03         | 2Val-Hgb     |
| 4.47         | 1Val-Ha      | 0.69         | 1Val-Hga     |
| 4.47         | 1Val-Ha      | 0.88         | 1Val-Hgb     |
| 4.15         | 5Val-Ha      | 0.94         | 5Val-Hga     |
| 9.07         | 3Gly-NH      | 3.90         | 2Val-Ha      |
| 8.15         | 4Gly-NH      | 4.14         | 3Gly-Hab     |
| 8.66         | 5Val-NH      | 3.64         | 4Gly-Haa     |
| 8.97         | 6Gly-NH      | 4.16         | 5Val-Ha      |
| 7.39         | 1Val-NH      | 4.13         | 6Gly-Hab     |
| 8.38         | 2Val-NH      | 4.47         | 1Val-Ha      |
| 8.15         | 4Gly-NH      | 3.77         | 3Gly-Haa     |
| 7.39         | 1Val-NH      | 3.73         | 6Gly-Haa     |
| 8.66         | 5Val-NH      | 4.34         | 4Gly-Hab     |
| 8.37         | 2Val-NH      | 2.20         | 1Val-Hb      |
| 8.37         | 2Val-NH      | 0.68         | 1Val-Hga     |
| 9.07         | 3Gly-NH      | 0.94         | 2Val-Hga     |
| 3.90         | 2Val-Ha      | 0.69         | 1Val-Hga     |
| 8.66         | 5Val-NH      | 4.33         | 4Gly-Hab     |
| 8.97         | 6Gly-NH      | 2.05         | 5Val-Hb      |
| 9.07         | 3Gly-NH      | 1.98         | 2Val-Hb      |
| 9.07         | 3Gly-NH      | 1.04         | 2Val-Hgb     |
| 8.97         | 6Gly-NH      | 7.39         | 1Val-NH      |
| 9.07         | 3Gly-NH      | 8.15         | 4Gly-NH      |
| 8.38         | 2Val-NH      | 7.39         | 1Val-NH      |
| 8.66         | 5Val-NH      | 8.15         | 4Gly-NH      |
| 8.15         | 4Gly-NH      | 0.69         | 1Val-Hga     |
| 8.15         | 4Gly-NH      | 3.91         | 2Val-Ha      |
| 8.66         | 5Val-NH      | 0.69         | 1Val-Hga     |

|      |          |      |          |
|------|----------|------|----------|
| 8.14 | 4Gly-NH  | 0.87 | 1Val-Hgb |
| 3.64 | 4Gly-Haa | 0.69 | 1Val-Hga |
| 3.64 | 4Gly-Haa | 0.88 | 1Val-Hgb |

**Table S5.**  $J$ -coupling values and associated torsional restraints for P7, cyclo-(VVGGVG). If the coupling constant was  $\leq 5$  Hz, a dihedral restraint of  $-60^\circ \pm 30^\circ$  was assigned; if the coupling constant was  $\geq 8$  Hz, a dihedral restraint of  $-120^\circ \pm 30^\circ$  was assigned.

| Residue        | $^3J_{\text{NHCH}_\alpha}$ (Hz) | $\varphi$ restraints ( $^\circ$ ) |
|----------------|---------------------------------|-----------------------------------|
| V <sub>1</sub> | 8.1                             | $-120 \pm 30$                     |
| V <sub>2</sub> | 4.7                             | $-60 \pm 30$                      |
| G <sub>3</sub> | 6.3                             |                                   |
| G <sub>4</sub> | 7.3                             |                                   |
| V <sub>5</sub> | 8.7                             | $-120 \pm 30$                     |
| G <sub>6</sub> | 6.2                             |                                   |

**Table S6.** List of NOE-derived distance restraints and  $J$ -coupling-derived dihedral angle restraints for P7, cyclo-(VVGGVG). The list was generated using CNSsolve (1, 2). In the list of distance restraints, the first number was the distance value between the two atoms in Å, and the second and third numbers were subtracted and added from the first number to obtain the lower and upper bounds, respectively. In the list of dihedral restraints, the first number was the energy constant (1.0), the second the value of the dihedral in degrees, the third the range around the dihedral ( $\pm$ ), and the last the exponent of the restraining function.

Distance constraints:

```
assign ( resid 1 and name HN ) ( resid 1 and name HA ) 3.6 0.7 0.7
assign ( resid 1 and name HN ) ( resid 1 and name HB ) 4.3 0.9 0.9
assign ( resid 1 and name HN ) ( resid 1 and name HG1# ) 3.7 0.7 0.7
assign ( resid 1 and name HN ) ( resid 1 and name HG2# ) 4.1 0.8 0.8
assign ( resid 1 and name HN ) ( resid 6 and name HA2 ) 3.5 0.7 0.7
assign ( resid 1 and name HN ) ( resid 6 and name HA1 ) 4.2 0.8 0.8
assign ( resid 1 and name HA ) ( resid 1 and name HG1# ) 3.3 0.7 0.7
assign ( resid 1 and name HA ) ( resid 1 and name HG2# ) 2.8 0.6 0.6
assign ( resid 1 and name HA ) ( resid 1 and name HB ) 2.6 0.5 0.5
```

```
assign ( resid 2 and name HN ) ( resid 2 and name HA ) 3.5 0.7 0.7
assign ( resid 2 and name HN ) ( resid 2 and name HB ) 3.0 0.6 0.6
assign ( resid 2 and name HN ) ( resid 2 and name HG2# ) 4.1 0.8 0.8
assign ( resid 2 and name HN ) ( resid 2 and name HG1# ) 3.2 0.6 0.6
assign ( resid 2 and name HN ) ( resid 1 and name HA ) 2.9 0.6 0.6
assign ( resid 2 and name HN ) ( resid 1 and name HB ) 3.1 0.6 0.6
assign ( resid 2 and name HN ) ( resid 1 and name HG1# ) 4.1 0.8 0.8
assign ( resid 2 and name HN ) ( resid 1 and name HN ) 5.0 1.0 1.0
assign ( resid 2 and name HA ) ( resid 2 and name HG2# ) 2.9 0.6 0.6
assign ( resid 2 and name HA ) ( resid 2 and name HG1# ) 2.7 0.5 0.5
assign ( resid 2 and name HA ) ( resid 1 and name HG1# ) 5.0 1.0 1.0
assign ( resid 2 and name HA ) ( resid 2 and name HB ) 3.0 0.6 0.6
```

```
assign ( resid 3 and name HN ) ( resid 3 and name HA1 ) 2.9 0.6 0.6
assign ( resid 3 and name HN ) ( resid 3 and name HA2 ) 4.2 0.8 0.8
assign ( resid 3 and name HN ) ( resid 2 and name HA ) 2.7 0.5 0.5
assign ( resid 3 and name HN ) ( resid 2 and name HG2# ) 4.0 0.8 0.8
assign ( resid 3 and name HN ) ( resid 4 and name HN ) 3.5 0.7 0.7
```

```
assign ( resid 4 and name HN ) ( resid 4 and name HA1 ) 3.3 0.7 0.7
assign ( resid 4 and name HN ) ( resid 4 and name HA2 ) 3.5 0.7 0.7
```

assign ( resid 4 and name HN ) ( resid 3 and name HA2 ) 3.7 0.7 0.7  
 assign ( resid 4 and name HN ) ( resid 3 and name HA1 ) 3.9 0.8 0.8  
 assign ( resid 4 and name HN ) ( resid 1 and name HG1# ) 4.1 0.8 0.8

assign ( resid 5 and name HN ) ( resid 5 and name HA ) 3.6 0.7 0.7  
 assign ( resid 5 and name HN ) ( resid 5 and name HB ) 3.2 0.6 0.6  
 assign ( resid 5 and name HN ) ( resid 5 and name HG1# ) 3.6 0.7 0.7  
 assign ( resid 5 and name HN ) ( resid 4 and name HA2 ) 2.9 0.6 0.6  
 assign ( resid 5 and name HN ) ( resid 4 and name HN ) 5.1 1.0 1.0  
 assign ( resid 5 and name HA ) ( resid 5 and name HG1# ) 2.7 0.5 0.5  
 assign ( resid 5 and name HA ) ( resid 5 and name HB ) 3.2 0.6 0.6

assign ( resid 6 and name HN ) ( resid 6 and name HA1 ) 2.9 0.6 0.6  
 assign ( resid 6 and name HN ) ( resid 6 and name HA2 ) 2.7 0.5 0.5  
 assign ( resid 6 and name HN ) ( resid 5 and name HA ) 2.7 0.5 0.5  
 assign ( resid 6 and name HN ) ( resid 1 and name HN ) 3.8 0.8 0.8

Phi dihedral angle constraints:

assign ( resid 6 and name c ) ( resid 1 and name n )  
 ( resid 1 and name ca ) ( resid 1 and name c ) 1.0 -120.0 30.0 2  
 assign ( resid 1 and name c ) ( resid 2 and name n )  
 ( resid 2 and name ca ) ( resid 2 and name c ) 1.0 -60.0 30.0 2  
 assign ( resid 4 and name c ) ( resid 5 and name n )  
 ( resid 5 and name ca ) ( resid 5 and name c ) 1.0 -120.0 30.0 2

**Table S7.** NOEs for P6, cyclo-(VVG VGG).

| Coordinate 1 | Assignment 1 | Coordinate 2 | Assignment 2 |
|--------------|--------------|--------------|--------------|
| 8.96         | 5Gly-NH      | 3.86         | 5Gly-Haa     |
| 8.96         | 5Gly-NH      | 4.07         | 5Gly-Hab     |
| 8.02         | 2Val-NH      | 4.18         | 2Val-Ha      |
| 7.80         | 6Gly-NH      | 3.91         | 6Gly-Haa     |
| 7.80         | 6Gly-NH      | 4.24         | 6Gly-Hab     |
| 8.34         | 4Val-NH      | 3.94         | 4Val-Ha      |
| 8.33         | 1Val-NH      | 4.00         | 1Val-Ha      |
| 8.29         | 3Gly-NH      | 3.85         | 3Gly-Haa     |
| 8.29         | 3Gly-NH      | 4.05         | 3Gly-Hab     |
| 8.28         | 3Gly-NH      | 2.09         | 2Val-Hb      |
| 8.96         | 5Gly-NH      | 0.94         | 4Val-Hga     |
| 8.97         | 5Gly-NH      | 2.05         | 4Val-Hb      |
| 8.34         | 4Val-NH      | 2.04         | 4Val-Hb      |
| 8.32         | 1Val-NH      | 2.11         | 1Val-Hb      |
| 8.02         | 2Val-NH      | 2.90         | 2Val-Hb      |
| 8.32         | 1Val-NH      | 1.00         | 1Val-Hga     |
| 8.02         | 2Val-NH      | 0.91         | 2Val-Hga     |
| 8.34         | 4Val-NH      | 0.94         | 4Val-Hga     |
| 4.17         | 2Val-Ha      | 2.08         | 2Val-Hb      |
| 4.00         | 1Val-Ha      | 2.12         | 1Val-Hb      |
| 3.94         | 4Val-Ha      | 2.05         | 4Val-Hb      |
| 4.17         | 2Val-Ha      | 0.92         | 2Val-Hga     |
| 4.00         | 1Val-Ha      | 1.00         | 1Val-Hga     |
| 3.94         | 4Val-Ha      | 1.00         | 4Val-Hgb     |
| 3.93         | 4Val-Ha      | 0.94         | 4Val-Hga     |
| 8.32         | 1Val-NH      | 4.24         | 6Gly-Hab     |
| 8.29         | 3Gly-NH      | 4.18         | 2Val-Ha      |

|      |         |      |          |
|------|---------|------|----------|
| 8.03 | 2Val-NH | 4.01 | 1Val-Ha  |
| 7.80 | 6Gly-NH | 4.07 | 5Gly-Hab |
| 8.97 | 5Gly-NH | 3.94 | 4Val-Ha  |
| 8.34 | 4Val-NH | 3.85 | 3Gly-Haa |
| 8.34 | 4Val-NH | 4.05 | 3Gly-Hab |
| 8.96 | 5Gly-NH | 7.80 | 6Gly-NH  |
| 8.33 | 1Val-NH | 7.80 | 6Gly-NH  |
| 8.32 | 1Val-NH | 8.03 | 2Val-NH  |
| 8.96 | 5Gly-NH | 8.34 | 4Val-NH  |
| 8.29 | 3Gly-NH | 8.03 | 2Val-NH  |
| 8.02 | 2Val-NH | 3.91 | 6Gly-Haa |

**Table S8.**  $J$ -coupling values and associated torsional restraints for P6, cyclo-(VVG VGG).

| Residue        | $^3J_{\text{NHCH}_\alpha}$ (Hz) | $\varphi$ restraints ( $^\circ$ ) |
|----------------|---------------------------------|-----------------------------------|
| V <sub>1</sub> | 7.9                             |                                   |
| V <sub>2</sub> | 9.5                             | $-120 \pm 30$                     |
| G <sub>3</sub> | 5.8                             |                                   |
| V <sub>4</sub> | 6.5                             |                                   |
| G <sub>5</sub> | 6.8                             |                                   |
| G <sub>6</sub> | –                               |                                   |

**Table S9.** List of NOE-derived distance restraints and  $J$ -coupling-derived dihedral angle restraints for P6, cyclo-(VVG VGG).

Distance constraints:

assign ( resid 1 and name HN ) ( resid 1 and name HA ) 3.5 0.7 0.7  
 assign ( resid 1 and name HN ) ( resid 1 and name HB ) 3.2 0.6 0.6  
 assign ( resid 1 and name HN ) ( resid 1 and name HG2# ) 3.0 0.6 0.6  
 assign ( resid 1 and name HA ) ( resid 1 and name HB ) 2.9 0.6 0.6  
 assign ( resid 1 and name HA ) ( resid 1 and name HG2# ) 2.6 0.5 0.5  
 assign ( resid 1 and name HN ) ( resid 6 and name HN ) 4.2 0.8 0.8  
 assign ( resid 1 and name HN ) ( resid 2 and name HN ) 3.3 0.7 0.7  
 assign ( resid 1 and name HN ) ( resid 6 and name HA1 ) 3.5 0.7 0.7

assign ( resid 2 and name HA ) ( resid 2 and name HB ) 3.0 0.6 0.6  
 assign ( resid 2 and name HN ) ( resid 2 and name HA ) 3.3 0.7 0.7  
 assign ( resid 2 and name HN ) ( resid 2 and name HB ) 3.2 0.6 0.6  
 assign ( resid 2 and name HN ) ( resid 2 and name HG1# ) 3.5 0.7 0.7  
 assign ( resid 2 and name HA ) ( resid 2 and name HG1# ) 2.7 0.5 0.5  
 assign ( resid 2 and name HN ) ( resid 6 and name HA2 ) 4.3 0.9 0.9  
 assign ( resid 2 and name HN ) ( resid 1 and name HA ) 3.6 0.7 0.7

assign ( resid 3 and name HN ) ( resid 3 and name HA1 ) 3.0 0.6 0.6  
 assign ( resid 3 and name HN ) ( resid 3 and name HA2 ) 3.4 0.7 0.7  
 assign ( resid 3 and name HN ) ( resid 2 and name HB ) 3.9 0.8 0.8  
 assign ( resid 3 and name HN ) ( resid 2 and name HN ) 3.7 0.7 0.7  
 assign ( resid 3 and name HN ) ( resid 2 and name HA ) 2.8 0.6 0.6

assign ( resid 4 and name HN ) ( resid 4 and name HA ) 3.2 0.6 0.6  
 assign ( resid 4 and name HN ) ( resid 4 and name HB ) 3.1 0.6 0.6  
 assign ( resid 4 and name HN ) ( resid 4 and name HG1# ) 3.9 0.8 0.8  
 assign ( resid 4 and name HA ) ( resid 4 and name HB ) 3.1 0.6 0.6  
 assign ( resid 4 and name HA ) ( resid 4 and name HG2# ) 2.8 0.6 0.6  
 assign ( resid 4 and name HA ) ( resid 4 and name HG1# ) 2.9 0.6 0.6



assign ( resid 4 and name HN ) ( resid 3 and name HA1 ) 3.2 0.6 0.6  
 assign ( resid 4 and name HN ) ( resid 3 and name HA2 ) 2.9 0.6 0.6

assign ( resid 5 and name HN ) ( resid 5 and name HA1 ) 3.1 0.6 0.6  
 assign ( resid 5 and name HN ) ( resid 5 and name HA2 ) 3.6 0.7 0.7  
 assign ( resid 5 and name HN ) ( resid 6 and name HN ) 3.5 0.7 0.7  
 assign ( resid 5 and name HN ) ( resid 4 and name HN ) 4.1 0.8 0.8  
 assign ( resid 5 and name HN ) ( resid 4 and name HG1# ) 4.0 0.8 0.8  
 assign ( resid 5 and name HN ) ( resid 4 and name HB ) 4.9 1.0 1.0  
 assign ( resid 5 and name HN ) ( resid 4 and name HA ) 2.8 0.6 0.6

assign ( resid 6 and name HN ) ( resid 6 and name HA2 ) 3.0 0.6 0.6  
 assign ( resid 6 and name HN ) ( resid 6 and name HA1 ) 3.5 0.7 0.7  
 assign ( resid 6 and name HN ) ( resid 5 and name HA2 ) 3.7 0.7 0.7

Phi dihedral angle constraints:

assign ( resid 1 and name c ) ( resid 2 and name n )  
 ( resid 2 and name ca ) ( resid 2 and name c ) 1.0 -120.0 30.0 2

**Table S10.** NOEs for VII, cyclo-(IVGGVG).

| Coordinate 1 | Assignment 1 | Coordinate 2 | Assignment 2 |
|--------------|--------------|--------------|--------------|
| 9.00         | 3Gly-NH      | 3.77         | 3Gly-Haa     |
| 8.92         | 6Gly-NH      | 3.73         | 6Gly-Haa     |
| 8.56         | 5Val-NH      | 4.14         | 5Val-Ha      |
| 8.14         | 4Gly-NH      | 3.68         | 4Gly-Haa     |
| 8.14         | 4Gly-NH      | 4.30         | 4Gly-Hab     |
| 7.45         | 1Ile-NH      | 4.47         | 1Ile-Ha      |
| 8.99         | 3Gly-NH      | 4.13         | 3Gly-Hab     |
| 8.26         | 2Val-NH      | 3.94         | 2Val-Ha      |
| 8.92         | 6Gly-NH      | 4.11         | 6Gly-Hab     |
| 8.56         | 5Val-NH      | 2.05         | 5Val-Hb      |
| 8.56         | 5Val-NH      | 0.96         | 5Val-Hga     |
| 8.27         | 2Val-NH      | 1.99         | 2Val-Hb      |
| 8.27         | 2Val-NH      | 1.00         | 2Val-Hgb     |
| 8.27         | 2Val-NH      | 0.93         | 2Val-Hga     |
| 7.46         | 1Ile-NH      | 0.86         | 1Ile-Hd1     |
| 7.45         | 1Ile-NH      | 0.96         | 1Ile-Hg2     |
| 7.45         | 1Ile-NH      | 1.91         | 1Ile-Hb      |
| 7.45         | 1Ile-NH      | 1.14         | 1Ile-Hg1a    |
| 4.46         | 1Ile-Ha      | 0.86         | 1Ile-Hd1     |
| 4.46         | 1Ile-Ha      | 1.91         | 1Ile-Hb      |
| 4.46         | 1Ile-Ha      | 1.14         | 1Ile-Hg1a    |
| 4.15         | 5Val-Ha      | 2.06         | 5Val-Hb      |
| 1.91         | 1Ile-Hb      | 1.14         | 1Ile-Hg1a    |
| 1.99         | 2Val-Hb      | 1.03         | 2Val-Hgb     |
| 0.97         | 1Ile-Hb      | 1.15         | 1Ile-Hg1a    |
| 0.85         | 1Ile-Hg2     | 1.15         | 1Ile-Hg1a    |
| 4.15         | 5Val-Ha      | 0.97         | 5Val-Hga     |
| 3.93         | 2Val-Ha      | 0.93         | 2Val-Hga     |
| 3.93         | 2Val-Ha      | 1.03         | 2Val-Hgb     |
| 3.94         | 2Val-Ha      | 2.00         | 2Val-Hb      |
| 9.00         | 3Gly-NH      | 3.94         | 2Val-Ha      |
| 8.56         | 5Val-NH      | 3.68         | 4Gly-Haa     |
| 8.56         | 5Val-NH      | 4.30         | 4Gly-Hab     |

|      |          |      |           |
|------|----------|------|-----------|
| 8.26 | 2Val-NH  | 4.47 | 1Ile-Ha   |
| 8.14 | 4Gly-NH  | 3.77 | 3Gly-Haa  |
| 8.14 | 4Gly-NH  | 4.13 | 3Gly-Hab  |
| 7.45 | 1Ile-NH  | 3.74 | 6Gly-Haa  |
| 7.45 | 1Ile-NH  | 4.11 | 6Gly-Hab  |
| 8.92 | 6Gly-NH  | 4.14 | 5Val-Ha   |
| 9.00 | 3Gly-NH  | 1.98 | 2Val-Hb   |
| 8.92 | 6Gly-NH  | 2.05 | 5Vala-Hb  |
| 9.00 | 3Gly-NH  | 1.02 | 2ValHgb   |
| 9.00 | 3Gly-NH  | 0.93 | 2Val-Hga  |
| 8.27 | 2Val-NH  | 1.14 | 1Ile-Hg1a |
| 8.26 | 2Val-NH  | 0.84 | 1Ile-Hd1  |
| 8.26 | 2Val-NH  | 1.91 | 1Ile-Hb   |
| 1.91 | 2Val-Hb  | 0.85 | 1Ile-Hb   |
| 2.01 | 1Ile-Hd1 | 0.93 | 2Val-Hga  |
| 8.27 | 2Val-NH  | 7.45 | 1Ile-NH   |
| 9.00 | 3Gly-NH  | 8.14 | 4Gly-NH   |
| 8.56 | 5Val-NH  | 8.14 | 4Gly-NH   |
| 8.92 | 6Gly-NH  | 7.47 | 1Ile-NH   |
| 8.14 | 4Gly-NH  | 3.95 | 2Val-Ha   |
| 8.14 | 4Gly-NH  | 1.14 | 1Ile-Hg1a |
| 8.13 | 4Gly-NH  | 0.85 | 1Ile-Hd1  |
| 3.67 | 4Gly-Haa | 1.14 | 1Ile-Hg1a |
| 3.67 | 4Gly-Haa | 0.95 | 5Val-Hga  |
| 3.67 | 4Gly-Haa | 0.85 | 1Ile-Hd1  |
| 2.06 | 2Val-Hb  | 0.94 | 5Val-Hga  |

**Table S11.**  $J$ -coupling values and associated torsional restraints for VII, cyclo-(IVGGVG).

| Residue        | $^3J_{\text{NHCH}_\alpha}$ (Hz) | $\phi$ restraints ( $^\circ$ ) |
|----------------|---------------------------------|--------------------------------|
| I <sub>1</sub> | 8.0                             | $-120 \pm 30$                  |
| V <sub>2</sub> | 5.1                             |                                |
| G <sub>3</sub> | 6.4                             |                                |
| G <sub>4</sub> | 7.3                             |                                |
| V <sub>5</sub> | 9.0                             | $-120 \pm 30$                  |
| G <sub>6</sub> | 6.2                             |                                |

**Table S12.** List of NOE-derived distance restraints and  $J$ -coupling-derived dihedral angle restraints for VII, cyclo-(IVGGVG).

Distance constraints:

assign ( resid 1 and name HN ) ( resid 1 and name HA ) 4.6 0.9 0.9  
assign ( resid 1 and name HN ) ( resid 6 and name HA2 ) 4.2 0.8 0.8  
assign ( resid 1 and name HN ) ( resid 6 and name HA1 ) 3.5 0.7 0.7  
assign ( resid 1 and name HN ) ( resid 1 and name HD1# ) 3.6 0.7 0.7  
assign ( resid 1 and name HN ) ( resid 1 and name HG2# ) 3.6 0.7 0.7  
assign ( resid 1 and name HN ) ( resid 1 and name HB ) 4.0 0.8 0.8  
assign ( resid 1 and name HN ) ( resid 1 and name HG13 ) 4.1 0.8 0.8  
assign ( resid 1 and name HA ) ( resid 1 and name HD1# ) 3.7 0.7 0.7  
assign ( resid 1 and name HA ) ( resid 1 and name HB ) 3.6 0.7 0.7  
assign ( resid 1 and name HA ) ( resid 1 and name HG13 ) 4.6 0.9 0.9  
assign ( resid 1 and name HB ) ( resid 1 and name HG13 ) 3.2 0.6 0.6  
assign ( resid 1 and name HB ) ( resid 1 and name HD1# ) 2.7 0.5 0.5  
assign ( resid 1 and name HG2# ) ( resid 1 and name HG13 ) 2.6 0.5 0.5

assign ( resid 1 and name HD1# ) ( resid 1 and name HG13 ) 2.3 0.5 0.5

assign ( resid 2 and name HN ) ( resid 2 and name HA ) 3.2 0.6 0.6  
assign ( resid 2 and name HN ) ( resid 1 and name HA ) 2.8 0.6 0.6  
assign ( resid 2 and name HN ) ( resid 2 and name HB ) 2.9 0.6 0.6  
assign ( resid 2 and name HN ) ( resid 2 and name HG2# ) 2.9 0.6 0.6  
assign ( resid 2 and name HN ) ( resid 2 and name HG1# ) 3.6 0.7 0.7  
assign ( resid 2 and name HN ) ( resid 1 and name HG13 ) 3.9 0.8 0.8  
assign ( resid 2 and name HN ) ( resid 1 and name HD1# ) 4.0 0.8 0.8  
assign ( resid 2 and name HN ) ( resid 1 and name HB ) 3.1 0.6 0.6  
assign ( resid 2 and name HA ) ( resid 2 and name HG1# ) 3.2 0.6 0.6  
assign ( resid 2 and name HA ) ( resid 2 and name HG2# ) 3.0 0.6 0.6  
assign ( resid 2 and name HA ) ( resid 2 and name HB ) 3.1 0.6 0.6  
assign ( resid 2 and name HB ) ( resid 2 and name HG2# ) 2.9 0.6 0.6  
assign ( resid 2 and name HB ) ( resid 2 and name HG1# ) 2.7 0.5 0.5  
assign ( resid 2 and name HN ) ( resid 1 and name HN ) 4.3 0.9 0.9

assign ( resid 3 and name HN ) ( resid 3 and name HA2 ) 2.8 0.6 0.6  
assign ( resid 3 and name HN ) ( resid 3 and name HA1 ) 4.5 0.9 0.9  
assign ( resid 3 and name HN ) ( resid 2 and name HA ) 2.5 0.5 0.5  
assign ( resid 3 and name HN ) ( resid 2 and name HB ) 4.4 0.9 0.9  
assign ( resid 3 and name HN ) ( resid 2 and name HG2# ) 4.1 0.8 0.8  
assign ( resid 3 and name HN ) ( resid 2 and name HG1# ) 3.5 0.7 0.7  
assign ( resid 3 and name HN ) ( resid 4 and name HN ) 3.2 0.6 0.6

assign ( resid 4 and name HN ) ( resid 4 and name HA1 ) 3.2 0.6 0.6  
assign ( resid 4 and name HN ) ( resid 4 and name HA2 ) 3.4 0.7 0.7  
assign ( resid 4 and name HN ) ( resid 3 and name HA2 ) 3.8 0.8 0.8  
assign ( resid 4 and name HN ) ( resid 2 and name HA ) 4.2 0.8 0.8  
assign ( resid 4 and name HN ) ( resid 5 and name HA ) 3.6 0.7 0.7  
assign ( resid 4 and name HN ) ( resid 1 and name HG13 ) 3.7 0.7 0.7  
assign ( resid 4 and name HN ) ( resid 1 and name HD1# ) 4.2 0.8 0.8  
assign ( resid 4 and name HA1 ) ( resid 1 and name HG13 ) 5.1 1.0 1.0  
assign ( resid 4 and name HA1 ) ( resid 1 and name HG2# ) 6.3 1.3 1.3  
assign ( resid 4 and name HA1 ) ( resid 1 and name HD1# ) 4.6 0.9 0.9

assign ( resid 5 and name HN ) ( resid 5 and name HA ) 3.2 0.6 0.6  
assign ( resid 5 and name HN ) ( resid 4 and name HA1 ) 3.0 0.6 0.6  
assign ( resid 5 and name HN ) ( resid 4 and name HA2 ) 4.1 0.8 0.8  
assign ( resid 5 and name HN ) ( resid 5 and name HB ) 3.2 0.6 0.6  
assign ( resid 5 and name HN ) ( resid 5 and name HG1# ) 3.2 0.6 0.6  
assign ( resid 5 and name HA ) ( resid 5 and name HG1# ) 3.3 0.7 0.7  
assign ( resid 5 and name HA ) ( resid 5 and name HB ) 3.5 0.7 0.7  
assign ( resid 5 and name HB ) ( resid 5 and name HG1# ) 3.0 0.6 0.6  
assign ( resid 5 and name HN ) ( resid 4 and name HN ) 4.7 0.9 0.9

assign ( resid 6 and name HN ) ( resid 6 and name HA2 ) 2.8 0.6 0.6  
assign ( resid 6 and name HN ) ( resid 6 and name HA1 ) 3.0 0.6 0.6  
assign ( resid 6 and name HN ) ( resid 5 and name HB ) 4.4 0.9 0.9  
assign ( resid 6 and name HN ) ( resid 1 and name HN ) 3.6 0.7 0.7

Phi dihedral angle constraints:

assign ( resid 6 and name c ) ( resid 1 and name n )  
    ( resid 1 and name ca ) ( resid 1 and name c ) 1.0 -120.0 30.0 2  
assign ( resid 4 and name c ) ( resid 5 and name n )  
    ( resid 5 and name ca ) ( resid 5 and name c ) 1.0 -120.0 30.0 2

**Table S13.** NOEs for V1L, cyclo-(LVGGVG).

| Coordinate 1 | Assignment 1 | Coordinate 2 | Assignment 2 |
|--------------|--------------|--------------|--------------|
| 8.81         | 3Gly-NH      | 3.08         | 3Gly-Haa     |
| 8.81         | 3Gly-NH      | 4.04         | 3Gly-Hab     |
| 8.71         | 6Gly-NH      | 3.75         | 6Gly-Haa     |
| 8.71         | 6Gly-NH      | 4.04         | 6Gly-Hab     |
| 8.42         | 4Gly-NH      | 3.97         | 4Gly-Haa     |
| 8.05         | 5Val-Ha      | 4.17         | 5Val-Ha      |
| 7.97         | 2Val-NH      | 4.16         | 2Val-Ha      |
| 8.32         | 1Leu-NH      | 4.34         | 1Leu-Ha      |
| 8.05         | 5Val-Ha      | 2.10         | 5Val-Hb      |
| 7.97         | 2Val-NH      | 2.03         | 2Val-Hb      |
| 8.32         | 1Leu-NH      | 1.65         | 1Leu-Hba     |
| 8.32         | 1Leu-NH      | 0.87         | 1Leu-Hda     |
| 7.97         | 2Val-NH      | 0.95         | 2Val-Hgb     |
| 8.05         | 5Val-Ha      | 0.91         | 5Val-Hga     |
| 4.33         | 1Leu-Ha      | 0.86         | 1Leu-Hda     |
| 4.34         | 1Leu-Ha      | 1.69         | 1Leu-Hba     |
| 4.18         | 5Val-Ha      | 2.11         | 5Val-Hb      |
| 4.16         | 2Val-Ha      | 2.04         | 2Val-Hb      |
| 2.04         | 2Val-Hb      | 0.93         | 2Val-Hgb     |
| 2.10         | 5Val-Hb      | 0.93         | 5Val-Hga     |
| 1.70         | 1Leu-Hba     | 0.87         | 1Leu-Hda     |
| 1.64         | 1Leu-Hbb     | 0.87         | 1Leu-Hda     |
| 7.97         | 2Val-NH      | 0.88         | 2Val-Hga     |
| 4.17         | 5Val-Ha      | 0.92         | 5Val-Hga     |
| 4.15         | 2Val-Ha      | 0.92         | 2Val-Hga     |
| 4.15         | 2Val-Ha      | 0.97         | 2Val-Hgb     |
| 8.81         | 3Gly-NH      | 4.16         | 2Val-Ha      |
| 8.71         | 6Gly-NH      | 4.17         | 5Val-Ha      |
| 8.42         | 4Gly-NH      | 3.80         | 3Gly-Haa     |
| 8.42         | 4Gly-NH      | 4.04         | 3Gly-Hab     |
| 8.31         | 1Leu-NH      | 3.75         | 6Gly-Haa     |
| 8.32         | 1Leu-NH      | 4.05         | 6Gly-Hab     |
| 7.97         | 2Val-NH      | 4.34         | 1Leu-Ha      |
| 8.05         | 5Val-NH      | 3.97         | 4Gly-Haa     |
| 7.97         | 2Val-NH      | 1.67         | 1Leu-Hba     |
| 8.81         | 3Gly-NH      | 2.03         | 2Val-Hb      |
| 8.72         | 6Gly-NH      | 2.10         | 5Val-Hb      |
| 8.81         | 3Gly-NH      | 0.92         | 2Val-Hgb     |
| 8.71         | 6Gly-NH      | 0.92         | 5Val-Hga     |
| 4.04         | 6Gly-Hab     | 0.92         | 5Val-Hga     |
| 3.97         | 4Gly-Haa     | 0.93         | 5Val-Hga     |
| 8.81         | 3Gly-NH      | 7.98         | 2Val-NH      |
| 8.71         | 6Gly-NH      | 8.05         | 5Val-NH      |
| 8.81         | 3Gly-NH      | 8.43         | 4Val-NH      |
| 8.71         | 6Gly-NH      | 8.32         | 1Leu-NH      |
| 8.43         | 4Gly-NH      | 8.06         | 5Val-NH      |
| 8.32         | 1Leu-NH      | 7.98         | 2Val-NH      |
| 8.42         | 4Gly-NH      | 0.89         | 2Val-Hga     |
| 3.96         | 4Gly-Haa     | 0.87         | 1Leu-Hda     |

**Table S14.** *J*-coupling values and associated torsional restraints for V1L, cyclo-(LVGGVG).

| Residue        | $^3J_{\text{NHCH}\alpha}$ (Hz) | $\varphi$ restraints ( $^\circ$ ) |
|----------------|--------------------------------|-----------------------------------|
| L <sub>1</sub> | 7.0                            |                                   |
| V <sub>2</sub> | 7.6                            |                                   |
| G <sub>3</sub> | 5.9                            |                                   |
| G <sub>4</sub> | 5.6                            |                                   |
| V <sub>5</sub> | 9.3                            | $-120 \pm 30$                     |
| G <sub>6</sub> | 6.1                            |                                   |

**Table S15.** List of NOE-derived distance restraints and  $J$ -coupling-derived dihedral angle restraints for VIL, cyclo-(LVGGVG).

Distance constraints:

assign ( resid 1 and name HN ) ( resid 1 and name HA ) 3.7 0.7 0.7  
assign ( resid 1 and name HN ) ( resid 6 and name HA1 ) 4.0 0.8 0.8  
assign ( resid 1 and name HN ) ( resid 6 and name HA2 ) 2.8 0.6 0.6  
assign ( resid 1 and name HN ) ( resid 2 and name HA ) 4.6 0.9 0.9  
assign ( resid 1 and name HN ) ( resid 1 and name HB2 ) 2.9 0.6 0.6  
assign ( resid 1 and name HN ) ( resid 1 and name HD1# ) 3.7 0.7 0.7  
assign ( resid 1 and name HN ) ( resid 2 and name HN ) 3.3 0.7 0.7  
assign ( resid 1 and name HA ) ( resid 1 and name HD1# ) 3.6 0.7 0.7  
assign ( resid 1 and name HA ) ( resid 1 and name HB2 ) 4.8 1.0 1.0  
assign ( resid 1 and name HB1 ) ( resid 1 and name HD1# ) 3.0 0.6 0.6  
assign ( resid 1 and name HB2 ) ( resid 1 and name HD1# ) 2.5 0.5 0.5

assign ( resid 2 and name HN ) ( resid 2 and name HA ) 3.4 0.7 0.7  
assign ( resid 2 and name HN ) ( resid 1 and name HA ) 3.1 0.6 0.6  
assign ( resid 2 and name HN ) ( resid 3 and name HA2 ) 4.5 0.9 0.9  
assign ( resid 2 and name HN ) ( resid 2 and name HB ) 3.0 0.6 0.6  
assign ( resid 2 and name HN ) ( resid 1 and name HB2 ) 3.4 0.7 0.7  
assign ( resid 2 and name HN ) ( resid 2 and name HG2# ) 3.0 0.6 0.6  
assign ( resid 2 and name HA ) ( resid 2 and name HB ) 3.9 0.8 0.8  
assign ( resid 2 and name HB ) ( resid 2 and name HG2# ) 2.9 0.6 0.6  
assign ( resid 2 and name HN ) ( resid 2 and name HG1# ) 4.0 0.8 0.8  
assign ( resid 2 and name HA ) ( resid 2 and name HG1# ) 2.9 0.6 0.6  
assign ( resid 2 and name HA ) ( resid 2 and name HG2# ) 3.5 0.7 0.7

assign ( resid 3 and name HN ) ( resid 3 and name HA1 ) 2.8 0.6 0.6  
assign ( resid 3 and name HN ) ( resid 3 and name HA2 ) 3.4 0.7 0.7  
assign ( resid 3 and name HN ) ( resid 2 and name HA ) 2.6 0.5 0.5  
assign ( resid 3 and name HN ) ( resid 2 and name HG2# ) 3.5 0.7 0.7  
assign ( resid 3 and name HN ) ( resid 2 and name HN ) 4.2 0.8 0.8  
assign ( resid 3 and name HN ) ( resid 4 and name HN ) 3.3 0.7 0.7  
assign ( resid 3 and name HN ) ( resid 2 and name HB ) 4.1 0.8 0.8

assign ( resid 4 and name HN ) ( resid 4 and name HA1 ) 2.6 0.5 0.5  
assign ( resid 4 and name HN ) ( resid 3 and name HA1 ) 3.5 0.7 0.7  
assign ( resid 4 and name HN ) ( resid 3 and name HA2 ) 3.2 0.6 0.6  
assign ( resid 4 and name HN ) ( resid 5 and name HA ) 4.2 0.8 0.8  
assign ( resid 4 and name HN ) ( resid 2 and name HG1# ) 4.5 0.9 0.9  
assign ( resid 4 and name HN ) ( resid 5 and name HN ) 3.4 0.7 0.7  
assign ( resid 4 and name HA1 ) ( resid 5 and name HG2# ) 4.4 0.9 0.9  
assign ( resid 4 and name HA1 ) ( resid 1 and name HD1# ) 4.4 0.9 0.9

assign ( resid 5 and name HN ) ( resid 5 and name HA ) 4.1 0.8 0.8  
assign ( resid 5 and name HN ) ( resid 4 and name HA1 ) 2.9 0.6 0.6  
assign ( resid 5 and name HN ) ( resid 6 and name HA2 ) 4.3 0.9 0.9

assign ( resid 5 and name HN ) ( resid 5 and name HB ) 3.2 0.6 0.6  
 assign ( resid 5 and name HN ) ( resid 5 and name HG2# ) 3.1 0.6 0.6  
 assign ( resid 5 and name HA ) ( resid 5 and name HB ) 3.6 0.7 0.7  
 assign ( resid 5 and name HB ) ( resid 5 and name HG2# ) 3.0 0.6 0.6  
 assign ( resid 5 and name HA ) ( resid 5 and name HG2# ) 3.1 0.6 0.6

assign ( resid 6 and name HN ) ( resid 6 and name HA1 ) 2.8 0.6 0.6  
 assign ( resid 6 and name HN ) ( resid 6 and name HA2 ) 3.3 0.7 0.7  
 assign ( resid 6 and name HN ) ( resid 5 and name HA ) 2.6 0.5 0.5  
 assign ( resid 6 and name HN ) ( resid 5 and name HB ) 4.2 0.8 0.8  
 assign ( resid 6 and name HN ) ( resid 5 and name HG2# ) 3.6 0.7 0.7  
 assign ( resid 6 and name HN ) ( resid 5 and name HN ) 3.9 0.8 0.8  
 assign ( resid 6 and name HN ) ( resid 1 and name HN ) 3.7 0.7 0.7  
 assign ( resid 6 and name HA2 ) ( resid 5 and name HG2# ) 8.0 1.6 0.0

Phi dihedral angle constraints:

assign ( resid 4 and name c ) ( resid 5 and name n )  
 ( resid 5 and name ca ) ( resid 5 and name c ) 1.0 -120.0 30.0 2

**Table S16.** NOEs for VIT, cyclo-(TVGGVG).

| Coordinate 1 | Assignment 1 | Coordinate 2 | Assignment 2 |
|--------------|--------------|--------------|--------------|
| 8.97         | 6Gly-NH      | 3.80         | 6Gly-Haa     |
| 8.97         | 6Gly-NH      | 4.10         | 6Gly-Hab     |
| 8.90         | 3Gly-NH      | 3.87         | 3GLy-Haa     |
| 8.90         | 3Gly-NH      | 4.03         | 3GLy-Hab     |
| 8.42         | 5Val-NH      | 4.07         | 5Val-Ha      |
| 8.14         | 2Val-NH      | 4.01         | 2Val-Ha      |
| 7.96         | 4Gly-NH      | 3.74         | 4GLy-Haa     |
| 7.96         | 4Gly-NH      | 4.22         | 4GLy-Hab     |
| 7.74         | 1Thr-NH      | 4.52         | 1Thr-Ha      |
| 7.74         | 1Thr-NH      | 4.26         | 1THr-Hb      |
| 8.14         | 2Val-NH      | 2.03         | 2Val-Hb      |
| 8.43         | 5Val-NH      | 2.04         | 5Val-Hb      |
| 7.74         | 1Thr-NH      | 1.06         | 1Thr-Hg1     |
| 8.15         | 2Val-NH      | 1.01         | 2Val-Hgb     |
| 8.15         | 2Val-NH      | 0.93         | 2Val-Hga     |
| 8.43         | 5Val-NH      | 0.97         | 5Val-Hgb     |
| 8.43         | 5Val-NH      | 0.92         | 5Val-Hga     |
| 4.51         | 1Thr-Ha      | 1.06         | 1Thr-Hg1     |
| 4.25         | 1Thr-Hb      | 1.06         | 1Thr-Hg1     |
| 4.07         | 5Val-Ha      | 0.98         | 5Val-Hgb     |
| 4.07         | 5Val-Ha      | 0.93         | 5Val-Hga     |
| 4.02         | 2Val-Ha      | 1.01         | 2Val-Hgb     |
| 4.02         | 2Val-Ha      | 0.93         | 2Val-Hga     |
| 4.03         | 2Val-Ha      | 2.02         | 2Val-Ha      |
| 4.07         | 5Val-Ha      | 2.04         | 5Val-Hb      |
| 4.21         | 4Gly-Hab     | 3.74         | 4Gly-Haa     |
| 4.51         | 1Thr-Ha      | 4.26         | 1Thr-Hb      |
| 4.10         | 6Gly-Hab     | 3.80         | 6Gly-Haa     |
| 8.43         | 5Val-NH      | 3.74         | 4Gly-Haa     |
| 8.43         | 5Val-NH      | 4.23         | 4Gly-Hab     |
| 8.14         | 2Val-NH      | 4.26         | 1Thr-Hb      |
| 8.14         | 2Val-NH      | 4.51         | 1Thr-Ha      |
| 7.96         | 4Gly-NH      | 3.87         | 3Gly-Haa     |

|      |          |      |          |
|------|----------|------|----------|
| 7.96 | 4Gly-NH  | 4.04 | 3GLy-Hab |
| 7.74 | 1Thr-NH  | 3.80 | 6Gly-Haa |
| 7.75 | 1Thr-NH  | 4.10 | 6Gly-Hab |
| 8.96 | 6Gly-NH  | 4.06 | 5Val-Ha  |
| 8.90 | 3Gly-NH  | 2.03 | 2Val-Hb  |
| 8.97 | 6Gly-NH  | 2.04 | 5Val-Hb  |
| 8.97 | 6Gly-NH  | 0.92 | 5Val-Hga |
| 8.90 | 3Gly-NH  | 0.94 | 2Val-Hga |
| 8.90 | 3Gly-NH  | 1.00 | 2Val-Hgb |
| 3.74 | 4Gly-Haa | 0.95 | 5Val-Hga |
| 3.87 | 3Gly-Haa | 0.93 | 2Val-Hga |
| 8.97 | 6Gly-NH  | 7.75 | 1Thr-NH  |
| 8.90 | 3Gly-NH  | 7.96 | 4Gly-NH  |
| 8.90 | 3Gly-NH  | 8.15 | 2Val-NH  |
| 8.97 | 6Gly-NH  | 8.44 | 5Val-NH  |
| 8.42 | 5Val-NH  | 7.96 | 4Gly-NH  |
| 8.15 | 2Val-NH  | 7.74 | 1Thr-NH  |
| 3.74 | 4Gly-Haa | 1.06 | 1Thr-Hg1 |

**Table S17.** *J*-coupling values and associated torsional restraints for V1T, cyclo-(TVGGVG).

| Residue        | $^3J_{\text{NHCH}_\alpha}$ (Hz) | $\phi$ restraints ( $^\circ$ ) |
|----------------|---------------------------------|--------------------------------|
| T <sub>1</sub> | 8.1                             | $-120 \pm 30$                  |
| V <sub>2</sub> | 6.1                             |                                |
| G <sub>3</sub> | 6.1                             |                                |
| G <sub>4</sub> | 6.8                             |                                |
| V <sub>5</sub> | 8.0                             | $-120 \pm 30$                  |
| G <sub>6</sub> | 6.4                             |                                |

**Table S18.** List of NOE-derived distance restraints and *J*-coupling-derived dihedral angle restraints for V1T, cyclo-(TVGGVG).

Distance constraints:

assign ( resid 1 and name HN ) ( resid 1 and name HA ) 3.2 0.6 0.6  
assign ( resid 1 and name HN ) ( resid 1 and name HB ) 4.0 0.8 0.8  
assign ( resid 1 and name HN ) ( resid 6 and name HA2 ) 3.9 0.8 0.8  
assign ( resid 1 and name HN ) ( resid 6 and name HA1 ) 3.3 0.7 0.7  
assign ( resid 1 and name HN ) ( resid 1 and name HG1 ) 3.4 0.7 0.7  
assign ( resid 1 and name HA ) ( resid 1 and name HG1 ) 4.1 0.8 0.8  
assign ( resid 1 and name HB ) ( resid 1 and name HG1 ) 4.4 0.9 0.9  
assign ( resid 1 and name HA ) ( resid 1 and name HB ) 3.9 0.8 0.8

assign ( resid 2 and name HN ) ( resid 2 and name HA ) 3.5 0.7 0.7  
assign ( resid 2 and name HN ) ( resid 1 and name HB ) 3.0 0.6 0.6  
assign ( resid 2 and name HN ) ( resid 1 and name HA ) 2.9 0.6 0.6  
assign ( resid 2 and name HN ) ( resid 2 and name HB ) 2.9 0.6 0.6  
assign ( resid 2 and name HN ) ( resid 2 and name HG1# ) 3.0 0.6 0.6  
assign ( resid 2 and name HN ) ( resid 2 and name HG2# ) 3.4 0.7 0.7  
assign ( resid 2 and name HA ) ( resid 2 and name HG1# ) 3.2 0.6 0.6  
assign ( resid 2 and name HA ) ( resid 2 and name HG2# ) 3.2 0.6 0.6  
assign ( resid 2 and name HA ) ( resid 2 and name HB ) 3.3 0.7 0.7  
assign ( resid 2 and name HN ) ( resid 1 and name HN ) 3.8 0.8 0.8

assign ( resid 3 and name HN ) ( resid 3 and name HA2 ) 2.9 0.6 0.6  
assign ( resid 3 and name HN ) ( resid 3 and name HA1 ) 2.6 0.5 0.5  
assign ( resid 3 and name HN ) ( resid 2 and name HB ) 4.1 0.8 0.8

assign ( resid 3 and name HN ) ( resid 2 and name HG2# ) 3.5 0.7 0.7  
 assign ( resid 3 and name HN ) ( resid 2 and name HG1# ) 4.1 0.8 0.8  
 assign ( resid 3 and name HN ) ( resid 4 and name HN ) 3.2 0.6 0.6  
 assign ( resid 3 and name HN ) ( resid 2 and name HN ) 4.1 0.8 0.8

assign ( resid 4 and name HN ) ( resid 4 and name HA1 ) 3.3 0.7 0.7  
 assign ( resid 4 and name HN ) ( resid 4 and name HA2 ) 3.4 0.7 0.7  
 assign ( resid 4 and name HN ) ( resid 3 and name HA2 ) 3.8 0.8 0.8  
 assign ( resid 4 and name HN ) ( resid 3 and name HA1 ) 3.5 0.7 0.7  
 assign ( resid 4 and name HA1 ) ( resid 1 and name HG1 ) 4.7 0.9 0.9  
 assign ( resid 4 and name HA2 ) ( resid 4 and name HA1 ) 2.3 0.5 0.5

assign ( resid 5 and name HN ) ( resid 5 and name HA ) 3.2 0.6 0.6  
 assign ( resid 5 and name HN ) ( resid 4 and name HA1 ) 2.9 0.6 0.6  
 assign ( resid 5 and name HN ) ( resid 4 and name HA2 ) 3.6 0.7 0.7  
 assign ( resid 5 and name HN ) ( resid 5 and name HB ) 3.1 0.6 0.6  
 assign ( resid 5 and name HN ) ( resid 5 and name HG1# ) 3.1 0.6 0.6  
 assign ( resid 5 and name HN ) ( resid 5 and name HG2# ) 3.7 0.7 0.7  
 assign ( resid 5 and name HA ) ( resid 5 and name HG1# ) 3.5 0.7 0.7  
 assign ( resid 5 and name HA ) ( resid 5 and name HG2# ) 3.4 0.7 0.7  
 assign ( resid 5 and name HA ) ( resid 5 and name HB ) 3.3 0.7 0.7  
 assign ( resid 5 and name HN ) ( resid 4 and name HN ) 3.9 0.8 0.8

assign ( resid 6 and name HN ) ( resid 6 and name HA2 ) 2.9 0.6 0.6  
 assign ( resid 6 and name HN ) ( resid 6 and name HA1 ) 3.2 0.6 0.6  
 assign ( resid 6 and name HN ) ( resid 5 and name HA ) 2.8 0.6 0.6  
 assign ( resid 6 and name HN ) ( resid 5 and name HB ) 4.2 0.8 0.8  
 assign ( resid 6 and name HN ) ( resid 5 and name HG2# ) 3.8 0.8 0.8  
 assign ( resid 6 and name HA1 ) ( resid 6 and name HA2 ) 3.0 0.6 0.6  
 assign ( resid 6 and name HN ) ( resid 1 and name HN ) 3.3 0.7 0.7  
 assign ( resid 6 and name HN ) ( resid 5 and name HN ) 4.0 0.8 0.8

Phi dihedral angle constraints:

assign ( resid 6 and name c ) ( resid 1 and name n )  
 ( resid 1 and name ca ) ( resid 1 and name c ) 1.0 -120.0 30.0 2  
 assign ( resid 4 and name c ) ( resid 5 and name n )  
 ( resid 5 and name ca ) ( resid 5 and name c ) 1.0 -120.0 30.0 2

**Table S19.** NOEs for V1S, cyclo-(SVGGVG).

| Coordinate 1 | Assignment 1 | Coordinate 2 | Assignment 2 |
|--------------|--------------|--------------|--------------|
| 8.93         | 6Gly-NH      | 3.82         | 6Gly-Haa     |
| 8.93         | 6Gly-NH      | 4.08         | 6Gly-Hab     |
| 8.83         | 3Gly-NH      | 3.88         | 3Gly-Haa     |
| 8.83         | 3Gly-NH      | 4.01         | 3Gly-Hab     |
| 8.29         | 5Val-NH      | 4.10         | 5Val-Ha      |
| 8.19         | 2Val-NH      | 4.08         | 2Val-NH      |
| 8.09         | 4Gly-NH      | 3.84         | 4Gly-Haa     |
| 8.10         | 1Ser-NH      | 4.54         | 1Ser-Ha      |
| 8.09         | 4Gly-NH      | 4.13         | 4Gly-Hab     |
| 8.10         | 1Ser-NH      | 3.92         | 1Ser-Hbb     |
| 8.29         | 5Val-NH      | 2.05         | 5Val-Hb      |
| 8.19         | 2Val-NH      | 2.05         | 2Val-Hgb     |
| 8.19         | 2Val-NH      | 0.99         | 2Val-Hgb     |
| 8.19         | 2Val-NH      | 0.93         | 2Val-Hga     |
| 8.29         | 5Val-NH      | 0.97         | 5Val-Hgb     |



|      |          |      |          |
|------|----------|------|----------|
| 8.29 | 5Val-NH  | 0.93 | 5Val-Hgb |
| 2.05 | 5Val-Hb  | 0.95 | 5Val-Hga |
| 4.08 | 2Val-Ha  | 0.98 | 2Val-Hgb |
| 4.10 | 5Val-Ha  | 2.06 | 5Val-Hb  |
| 4.08 | 2Val-Ha  | 0.93 | 2Val-Hga |
| 4.10 | 5Val-Ha  | 0.93 | 5Val-Hga |
| 3.93 | 1Ser-Hbb | 4.54 | 1Ser-Ha  |
| 3.83 | 1Ser-Hba | 4.54 | 1Ser-Hba |
| 2.04 | 2Val-Hb  | 1.00 | 2Val-Hb  |
| 8.83 | 3Gly-NH  | 4.08 | 2Val-Ha  |
| 8.29 | 5Val-NH  | 3.84 | 4Gly-Haa |
| 8.09 | 1Ser-NH  | 4.08 | 6Gly-Hab |
| 8.09 | 4Gly-NH  | 4.00 | 3Gly-Hab |
| 8.19 | 2Val-NH  | 4.53 | 1Ser-Ha  |
| 8.19 | 2Val-NH  | 3.88 | 3Gly-Haa |
| 8.19 | 2Val-NH  | 3.92 | 1Ser-Hbb |
| 8.82 | 3Gly-NH  | 0.92 | 2Val-Hga |
| 8.83 | 3Gly-NH  | 0.98 | 2Val-Hgb |
| 8.93 | 6Gly-NH  | 0.92 | 5Val-Hga |
| 8.83 | 3Gly-NH  | 2.04 | 2Val-Hga |
| 8.93 | 6Gly-NH  | 2.06 | 5Val-Hb  |
| 8.93 | 6Gly-NH  | 8.10 | 1Ser-NH  |
| 8.82 | 3Gly-NH  | 8.09 | 4Gly-NH  |
| 8.82 | 3Gly-NH  | 8.20 | 2Val-NH  |
| 8.93 | 6Gly-NH  | 8.30 | 5Val-NH  |
| 8.28 | 5Val-NH  | 8.09 | 4Gly-NH  |
| 8.19 | 2Val-NH  | 8.09 | 1Ser-NH  |

**Table S20.**  $J$ -coupling values and associated torsional restraints for V1S, cyclo-(SVGGVG).

| Residue        | $^3J_{\text{NHCH}_\alpha}$ (Hz) | $\phi$ restraints ( $^\circ$ ) |
|----------------|---------------------------------|--------------------------------|
| S <sub>1</sub> | –                               |                                |
| V <sub>2</sub> | 6.2                             |                                |
| G <sub>3</sub> | 6.3                             |                                |
| G <sub>4</sub> | –                               |                                |
| V <sub>5</sub> | 8.3                             | $-120 \pm 30$                  |
| G <sub>6</sub> | 6.0                             |                                |

**Table S21.** List of NOE-derived distance restraints and  $J$ -coupling-derived dihedral angle restraints for V1S, cyclo-(SVGGVG).

Distance constraints:

```

assign ( resid 1 and name HN ) ( resid 1 and name HA ) 3.2 0.6 0.6
assign ( resid 1 and name HN ) ( resid 1 and name HB1 ) 3.7 0.7 0.7
assign ( resid 1 and name HN ) ( resid 6 and name HA2 ) 3.0 0.6 0.6
assign ( resid 1 and name HB1 ) ( resid 1 and name HA ) 3.4 0.7 0.7
assign ( resid 1 and name HB2 ) ( resid 1 and name HA ) 3.6 0.7 0.7

assign ( resid 2 and name HN ) ( resid 2 and name HA ) 3.4 0.7 0.7
assign ( resid 2 and name HN ) ( resid 1 and name HB1 ) 3.1 0.6 0.6
assign ( resid 2 and name HN ) ( resid 1 and name HA ) 3.1 0.6 0.6
assign ( resid 2 and name HN ) ( resid 2 and name HB ) 3.1 0.6 0.6
assign ( resid 2 and name HN ) ( resid 2 and name HG2# ) 3.1 0.6 0.6
assign ( resid 2 and name HN ) ( resid 2 and name HG1# ) 3.4 0.7 0.7
assign ( resid 2 and name HA ) ( resid 2 and name HG2# ) 3.2 0.6 0.6

```

assign ( resid 2 and name HA ) ( resid 2 and name HG1#) 3.0 0.6 0.6  
 assign ( resid 2 and name HN ) ( resid 1 and name HN) 3.4 0.7 0.7  
 assign ( resid 2 and name HB ) ( resid 2 and name HG2#) 3.3 0.7 0.7

assign ( resid 3 and name HN ) ( resid 3 and name HA1 ) 2.9 0.6 0.6  
 assign ( resid 3 and name HN ) ( resid 3 and name HA2 ) 3.6 0.7 0.7  
 assign ( resid 3 and name HN ) ( resid 2 and name HA ) 2.7 0.5 0.5  
 assign ( resid 3 and name HN ) ( resid 2 and name HB ) 4.0 0.8 0.8  
 assign ( resid 3 and name HN ) ( resid 2 and name HG1#) 3.5 0.7 0.7  
 assign ( resid 3 and name HN ) ( resid 2 and name HG2#) 3.9 0.8 0.8  
 assign ( resid 3 and name HN ) ( resid 4 and name HN) 3.2 0.6 0.6  
 assign ( resid 3 and name HN ) ( resid 2 and name HN) 3.8 0.8 0.8

assign ( resid 4 and name HN ) ( resid 4 and name HA2 ) 2.9 0.6 0.6  
 assign ( resid 4 and name HN ) ( resid 4 and name HA1) 3.3 0.7 0.7  
 assign ( resid 4 and name HN ) ( resid 3 and name HA2) 3.6 0.7 0.7

assign ( resid 5 and name HN ) ( resid 5 and name HA ) 3.3 0.7 0.7  
 assign ( resid 5 and name HN ) ( resid 4 and name HA2) 3.0 0.6 0.6  
 assign ( resid 5 and name HN ) ( resid 5 and name HB) 3.1 0.6 0.6  
 assign ( resid 5 and name HN ) ( resid 5 and name HG2#) 3.3 0.7 0.7  
 assign ( resid 5 and name HN ) ( resid 5 and name HG1#) 3.2 0.6 0.6  
 assign ( resid 5 and name HB ) ( resid 5 and name HG1#) 2.8 0.6 0.6  
 assign ( resid 5 and name HA ) ( resid 5 and name HB) 3.2 0.6 0.6  
 assign ( resid 5 and name HA ) ( resid 5 and name HG1#) 3.1 0.6 0.6  
 assign ( resid 5 and name HN ) ( resid 4 and name HN) 3.5 0.7 0.7

assign ( resid 6 and name HN ) ( resid 6 and name HA2) 2.9 0.6 0.6  
 assign ( resid 6 and name HN ) ( resid 6 and name HA1) 2.6 0.5 0.5  
 assign ( resid 6 and name HN ) ( resid 5 and name HB) 4.2 0.8 0.8  
 assign ( resid 6 and name HN ) ( resid 5 and name HG1#) 3.5 0.7 0.7  
 assign ( resid 6 and name HN ) ( resid 1 and name HN) 3.3 0.7 0.7  
 assign ( resid 6 and name HN ) ( resid 5 and name HN) 3.8 0.8 0.8

Phi dihedral angle constraints:

assign ( resid 4 and name c ) ( resid 5 and name n )  
 ( resid 5 and name ca ) ( resid 5 and name c ) 1.0 -120.0 30.0 2

**Table S22.** NOEs for VIA, cyclo-(AVGGVG).

| Coordinate 1 | Assignment 1 | Coordinate 2 | Assignment 2 |
|--------------|--------------|--------------|--------------|
| 8.85         | 3Gly-NH      | 4.05         | 3Gly-Hab     |
| 8.85         | 3Gly-NH      | 3.81         | 3Gly-Haa     |
| 8.78         | 6Gly-NH      | 3.78         | 6Gly-Haa     |
| 8.78         | 6Gly-NH      | 3.99         | 6Gly-Hab     |
| 8.31         | 4Gly-NH      | 3.95         | 4Gly-Haa     |
| 8.31         | 4Gly-NH      | 4.04         | 4Gly-Hab     |
| 8.15         | 5Val-NH      | 4.13         | 5Val-Ha      |
| 8.05         | 2Val-NH      | 4.10         | 2Val-Ha      |
| 8.20         | 1Ala-NH      | 4.36         | 1Ala-Ha      |
| 8.15         | 5Val-NH      | 2.07         | 5Val-Hb      |
| 8.05         | 2Val-NH      | 2.02         | 2Val-Hb      |
| 8.20         | 1Ala-NH      | 1.37         | 1Ala-Hb      |
| 8.05         | 2Val-NH      | 0.97         | 2Val-Hgb     |
| 8.15         | 5Val-NH      | 0.93         | 5Val-Hga     |
| 8.05         | 2Val-NH      | 0.93         | 2Val-Hga     |

|      |         |      |          |
|------|---------|------|----------|
| 4.36 | 1Ala-Ha | 1.38 | 1Ala-Hb  |
| 4.13 | 5Val-Ha | 0.93 | 5Val-Hga |
| 4.10 | 2Val-Ha | 0.93 | 2Val-Hga |
| 4.09 | 2Val-Ha | 0.97 | 2Val-Hgb |
| 4.14 | 5Val-Ha | 2.08 | 5Val-Hb  |
| 4.11 | 2Val-Ha | 2.03 | 2Val-Hb  |
| 2.07 | 5Val-Hb | 0.91 | 5Val-Hga |
| 2.00 | 2Val-Hb | 0.92 | 2Val-Hga |
| 2.00 | 2Val-Hb | 0.97 | 2Val-Hgb |
| 8.85 | 3Gly-NH | 4.10 | 2Val-Ha  |
| 8.79 | 6Gly-NH | 4.13 | 5Val-Ha  |
| 8.05 | 2Val-NH | 4.36 | 1Ala-Ha  |
| 8.15 | 5Val-NH | 3.95 | 4Gly-Haa |
| 8.21 | 1Ala-NH | 3.99 | 6Gly-Hab |
| 8.31 | 4Gly-NH | 3.82 | 3Gly-Haa |
| 8.21 | 1Ala-NH | 3.79 | 6Gly-Haa |
| 8.15 | 5Val-NH | 4.03 | 4Gly-Hab |
| 8.05 | 2Val-NH | 1.38 | 1Ala-Hb  |
| 8.78 | 6Gly-NH | 0.92 | 5Val-Hga |
| 8.85 | 3Gly-NH | 0.93 | 2Val-Hga |
| 8.85 | 3Gly-NH | 8.31 | 4Gly-NH  |
| 8.78 | 6Gly-NH | 8.20 | 1Ala-NH  |
| 8.31 | 4Gly-NH | 8.16 | 5Val-NH  |
| 8.20 | 1Ala-NH | 8.06 | 2Val-NH  |
| 8.85 | 3Gly-NH | 8.05 | 2Val-NH  |
| 8.78 | 6Gly-NH | 8.15 | 5Val-NH  |

**Table S23.**  $J$ -coupling values and associated torsional restraints for V1A, cyclo-(AVGGVG).

| Residue        | $^3J_{\text{NHCH}_\alpha}$ (Hz) | $\phi$ restraints ( $^\circ$ ) |
|----------------|---------------------------------|--------------------------------|
| A <sub>1</sub> | 6.4                             |                                |
| V <sub>2</sub> | 7.0                             |                                |
| G <sub>3</sub> | 5.8                             |                                |
| G <sub>4</sub> | 5.4                             |                                |
| V <sub>5</sub> | 8.8                             | $-120 \pm 30$                  |
| G <sub>6</sub> | 5.8                             |                                |

**Table S24.** List of NOE-derived distance restraints and  $J$ -coupling-derived dihedral angle restraints for V1A, cyclo-(AVGGVG).

Distance constraints:

assign ( resid 1 and name HN ) ( resid 1 and name HA ) 3.6 0.7 0.7  
 assign ( resid 1 and name HN ) ( resid 1 and name HB# ) 3.0 0.6 0.6  
 assign ( resid 1 and name HN ) ( resid 6 and name HA1 ) 3.0 0.6 0.6  
 assign ( resid 1 and name HN ) ( resid 6 and name HA2 ) 3.9 0.8 0.8  
 assign ( resid 1 and name HA ) ( resid 1 and name HB# ) 3.2 0.6 0.6  
 assign ( resid 1 and name HN ) ( resid 2 and name HN ) 3.6 0.7 0.7

assign ( resid 2 and name HN ) ( resid 2 and name HA ) 3.6 0.7 0.7  
 assign ( resid 2 and name HN ) ( resid 2 and name HB ) 3.1 0.6 0.6  
 assign ( resid 2 and name HN ) ( resid 2 and name HG1# ) 3.1 0.6 0.6  
 assign ( resid 2 and name HN ) ( resid 1 and name HA ) 3.2 0.6 0.6  
 assign ( resid 2 and name HN ) ( resid 2 and name HG2# ) 3.4 0.7 0.7  
 assign ( resid 2 and name HA ) ( resid 2 and name HG2# ) 3.3 0.7 0.7  
 assign ( resid 2 and name HA ) ( resid 2 and name HG1# ) 3.3 0.7 0.7

assign ( resid 2 and name HA ) ( resid 2 and name HB ) 3.4 0.7 0.7  
assign ( resid 2 and name HB ) ( resid 2 and name HG2# ) 3.0 0.6 0.6  
assign ( resid 2 and name HB ) ( resid 2 and name HG1# ) 3.3 0.7 0.7  
assign ( resid 2 and name HN ) ( resid 1 and name HB# ) 3.4 0.7 0.7

assign ( resid 3 and name HN ) ( resid 3 and name HA2 ) 3.6 0.7 0.7  
assign ( resid 3 and name HN ) ( resid 3 and name HA1 ) 2.9 0.6 0.6  
assign ( resid 3 and name HN ) ( resid 2 and name HA ) 2.7 0.5 0.5  
assign ( resid 3 and name HN ) ( resid 2 and name HG2# ) 3.6 0.7 0.7  
assign ( resid 3 and name HN ) ( resid 4 and name HN ) 3.4 0.7 0.7

assign ( resid 4 and name HN ) ( resid 4 and name HA2 ) 4.5 0.9 0.9  
assign ( resid 4 and name HN ) ( resid 4 and name HA1 ) 2.7 0.5 0.5  
assign ( resid 4 and name HN ) ( resid 3 and name HA1 ) 3.6 0.7 0.7  
assign ( resid 4 and name HN ) ( resid 5 and name HN ) 3.6 0.7 0.7

assign ( resid 5 and name HN ) ( resid 5 and name HA ) 4.0 0.8 0.8  
assign ( resid 5 and name HN ) ( resid 5 and name HB ) 3.3 0.7 0.7  
assign ( resid 5 and name HN ) ( resid 5 and name HG1# ) 3.1 0.6 0.6  
assign ( resid 5 and name HN ) ( resid 4 and name HA2 ) 3.2 0.6 0.6  
assign ( resid 5 and name HN ) ( resid 4 and name HA1 ) 3.6 0.7 0.7  
assign ( resid 5 and name HA ) ( resid 5 and name HG1# ) 3.0 0.6 0.6  
assign ( resid 5 and name HA ) ( resid 5 and name HB ) 3.5 0.7 0.7  
assign ( resid 5 and name HB ) ( resid 5 and name HG1# ) 2.9 0.6 0.6

assign ( resid 6 and name HN ) ( resid 6 and name HA2 ) 2.9 0.6 0.6  
assign ( resid 6 and name HN ) ( resid 6 and name HA1 ) 3.6 0.7 0.7  
assign ( resid 6 and name HN ) ( resid 5 and name HA ) 2.7 0.5 0.5  
assign ( resid 6 and name HN ) ( resid 5 and name HG1# ) 3.6 0.7 0.7  
assign ( resid 6 and name HN ) ( resid 1 and name HN ) 3.5 0.7 0.7

Phi dihedral angle constraints:

assign ( resid 4 and name c ) ( resid 5 and name n )  
    ( resid 5 and name ca ) ( resid 5 and name c ) 1.0 -120.0 30.0 2

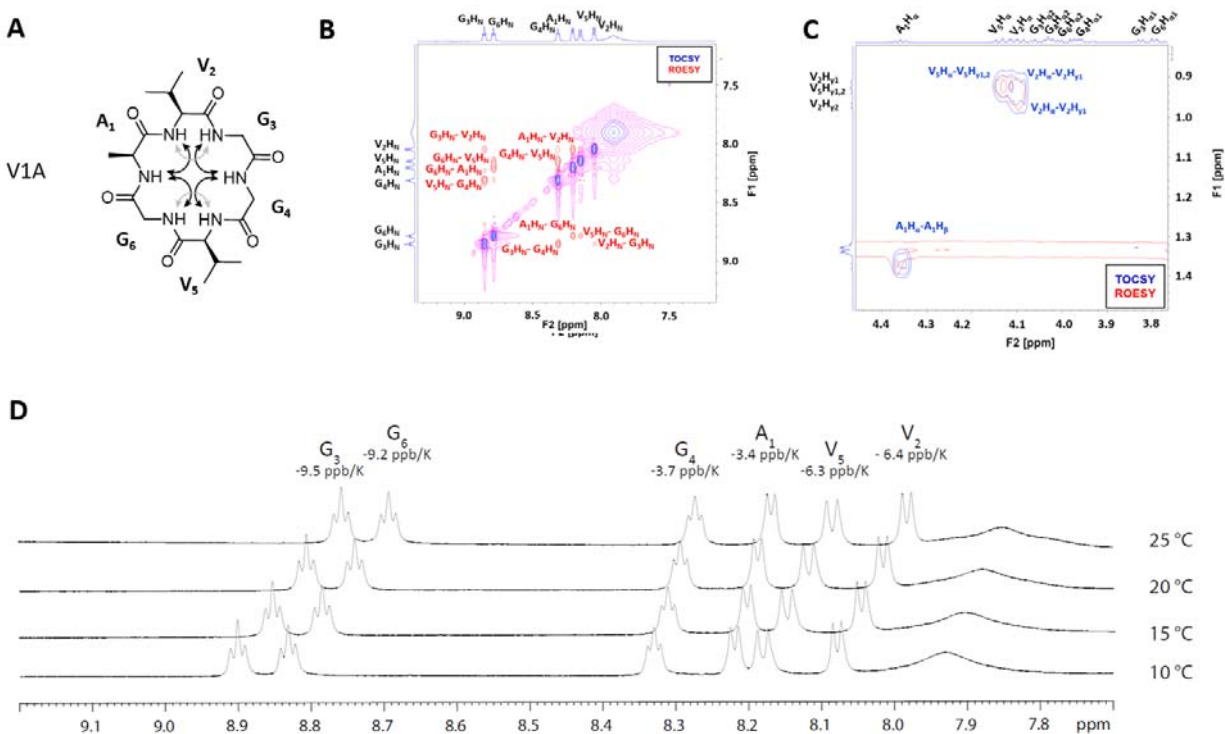

**Figure S4.** 2D-NMR data for peptide V1A (cyclo-AVGGVG) in water. (A) Visual depiction of the strong (black) and weak (grey) NOEs from the ROESY spectra for V1A. (B) Amide-to-amide proton region of the TOCSY and ROESY spectra for V1A. NOE cross-peaks are expected for positions at which beta-turns predominate in the solution ensemble. (C) Alpha-to-methyl proton region of the TOCSY and ROESY spectra for V1A. (D) Temperature dependence of amide proton chemical shifts. Stacked spectra show the amide regions of  $^1\text{H}$  NMR experiments at the indicated temperature. Solvent-exposed amide protons typically have chemical shifts that shift upfield with temperature by more than 4.5 ppb/K (temperature coefficient between  $-4.5$  and  $-16$  ppb/K). Temperature coefficients between  $2.0$  and  $-4.5$  ppb/K indicate protection from solvent, as occurs when an amide proton is involved in a hydrogen bond. Despite apparent  $> 99\%$  purity via HPLC and LC-MS, unidentified resonances were observed at 1.33 ppm and 7.93 ppm (visible in panels C and D, respectively). This did not interfere with analysis of the structural ensemble of V1A.

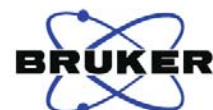

Current Data Parameters  
NAME ac072717  
EXPNO 2  
PROCNO 1

F2 - Acquisition Parameters  
Date\_ 20170727  
Time 13.52 h  
INSTRUM spect  
PROBHD B150372\_0005 (   
PULPROG zgpg30  
TD 32768  
SOLVENT H2O+D2O  
NS 16  
DS 4  
SWH 9615.355 Hz  
FIDRES 0.586077 Hz  
AQ 1.7039360 sec  
RG 84.85  
DW 52.000 usec  
DE 13.23 usec  
TE 288.2 K  
D1 1.00000000 sec  
D12 0.00002000 sec  
D16 0.00002000 sec  
TDO 1  
SFO1 600.1328100 MHz  
NUC1 1H  
P1 7.60 usec  
P2 15.20 usec  
P12 2000.00 usec  
PLW0 0 W  
PLW1 10.30399990 W  
SFOAL1 100.1000  
SFOAL2 0.500  
SFOFFS1 0 Hz  
SPW1 0.00059815 W  
GFNAM[1] SMSQ10.100  
GFE1 31.00 %  
GFNAM[2] SMSQ10.100  
GFE2 11.00 %  
P16 1000.00 usec

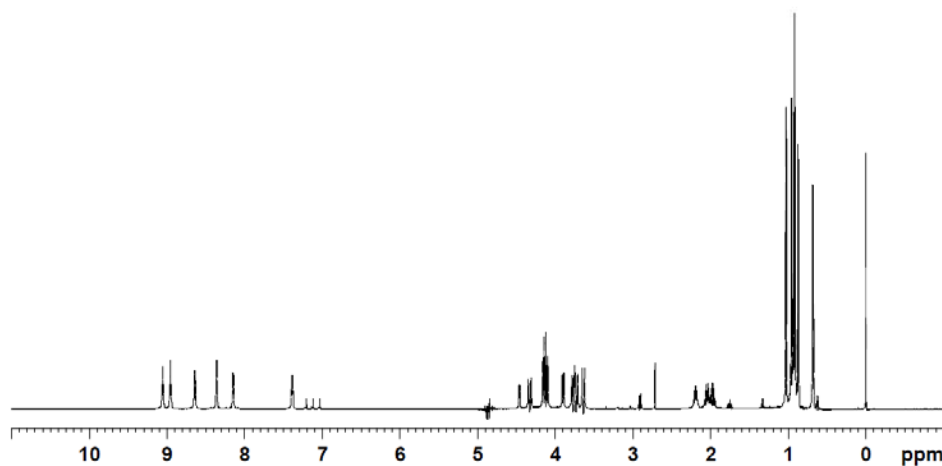

F2 - Processing parameters  
SI 32768  
SF 600.1298932 MHz  
WDW EM  
SSB 0  
LB 0.30 Hz  
GB 0  
PC 1.00

Figure S5. Complete <sup>1</sup>H NMR spectrum of P7 in 90:10 H<sub>2</sub>O:D<sub>2</sub>O at 288 K.

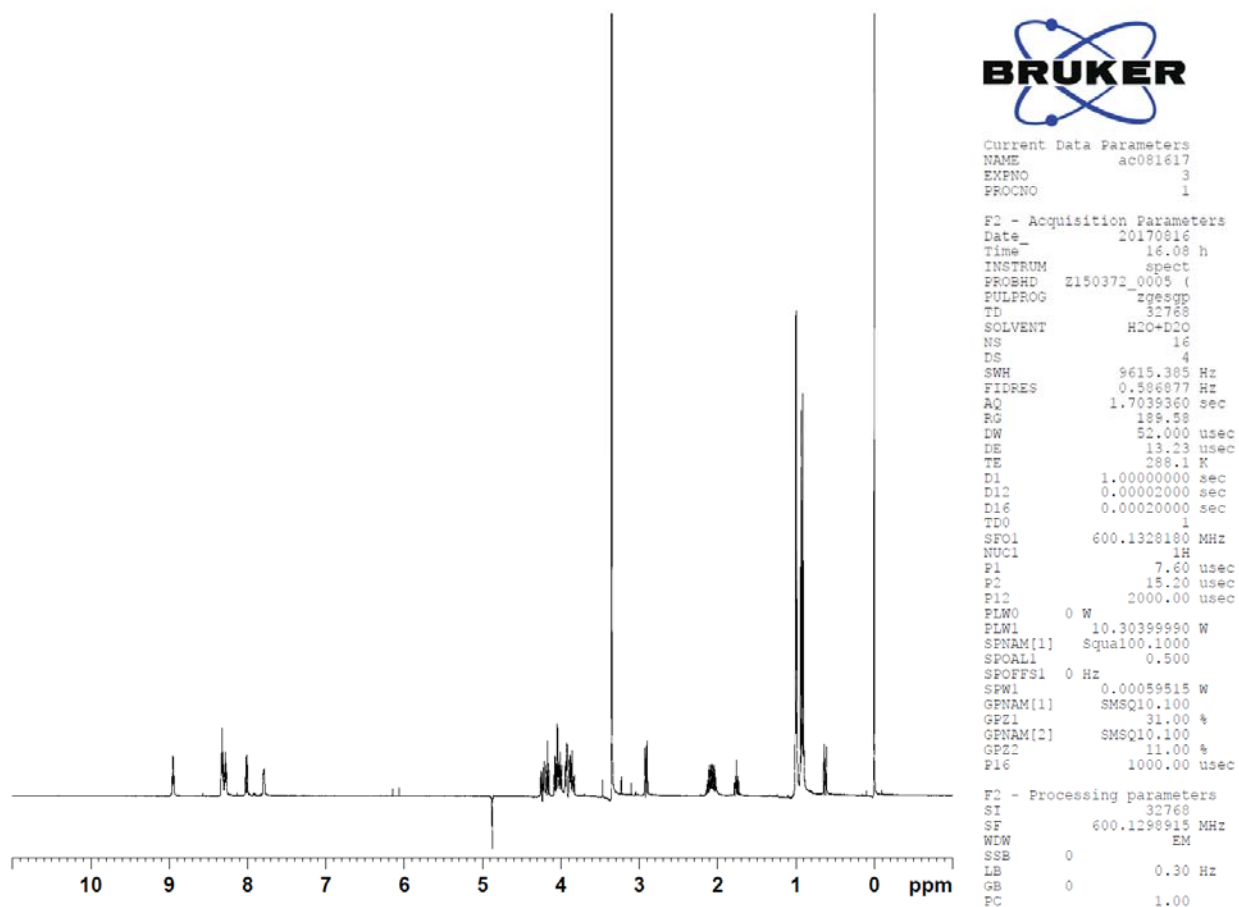

**Figure S6.** Complete  $^1\text{H}$  NMR spectrum of P6 in 90:10  $\text{H}_2\text{O}:\text{D}_2\text{O}$  at 288 K.

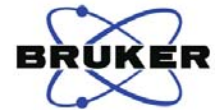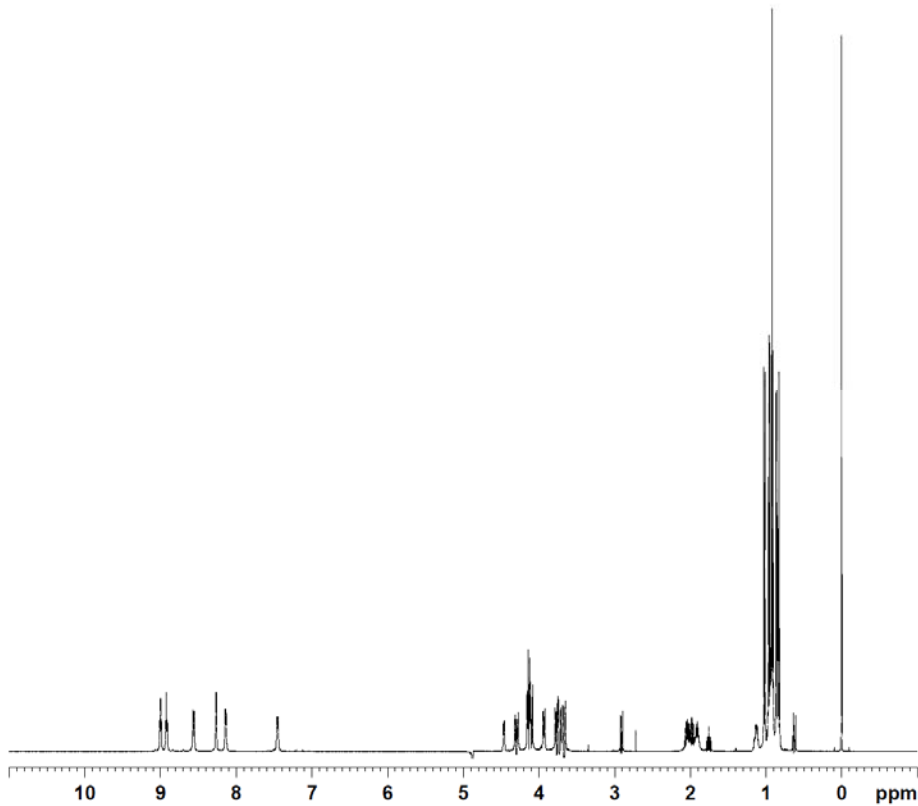

```
Current Data Parameters
NAME      aci21717_3
EXPNO    1
PROCNO   1

F2 - Acquisition Parameters
Date_    20171217
Time     16.25 h
INSTRUM  spect
PROBHD   Z150372_0005 (
PULPROG  zgpg30
TD       32768
SOLVENT  H2O-D2O
NS       16
DS       4
SWH      9615.385 Hz
FIDRES   0.588877 Hz
AQ       1.7039360 sec
RG       189.58
DW       52.000 usec
DE       13.23 usec
TE       288.1 K
D1       1.00000000 sec
D12      0.00002000 sec
D16      0.00020000 sec
TD0      1
SFO1     600.1328180 MHz
NUC1     1H
P1       7.60 usec
P2       15.20 usec
P12      2000.00 usec
PLW0     0 W
PLW1     10.30399990 W
SPNAM[1] Squal00.1000
SFOAL1   0.500
SPOFFS1  0 Hz
SFW1     0.00059515 W
GPNAM[1] SMSQ10.100
GPZ1     31.00 %
GPNAM[2] SMSQ10.100
GPZ2     11.00 %
P16      1000.00 usec

F2 - Processing parameters
SI       32768
SF       600.1298919 MHz
WDW      EM
SSB      0
LB       0.30 Hz
GB       0
PC       1.00
```

Figure S7. Complete <sup>1</sup>H NMR spectrum of VII in 90:10 H<sub>2</sub>O:D<sub>2</sub>O at 288 K.



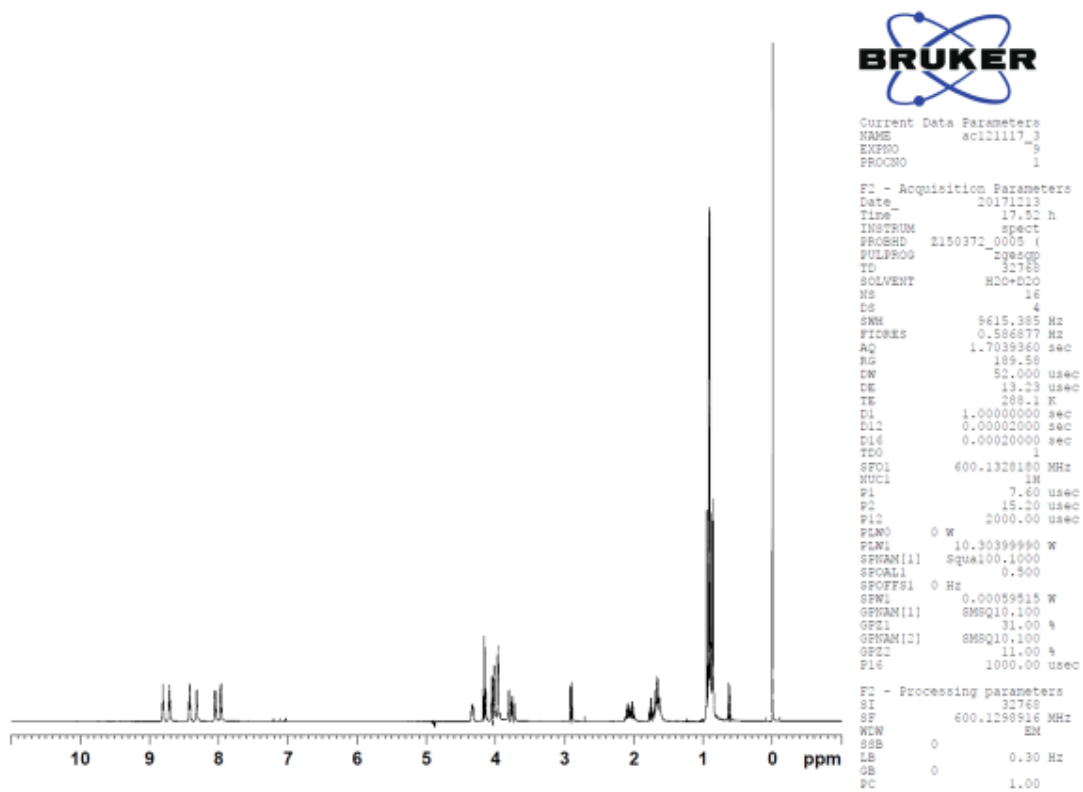

**Figure S8.** Complete  $^1\text{H}$  NMR spectrum of VIL in 90:10  $\text{H}_2\text{O}:\text{D}_2\text{O}$  at 288 K..

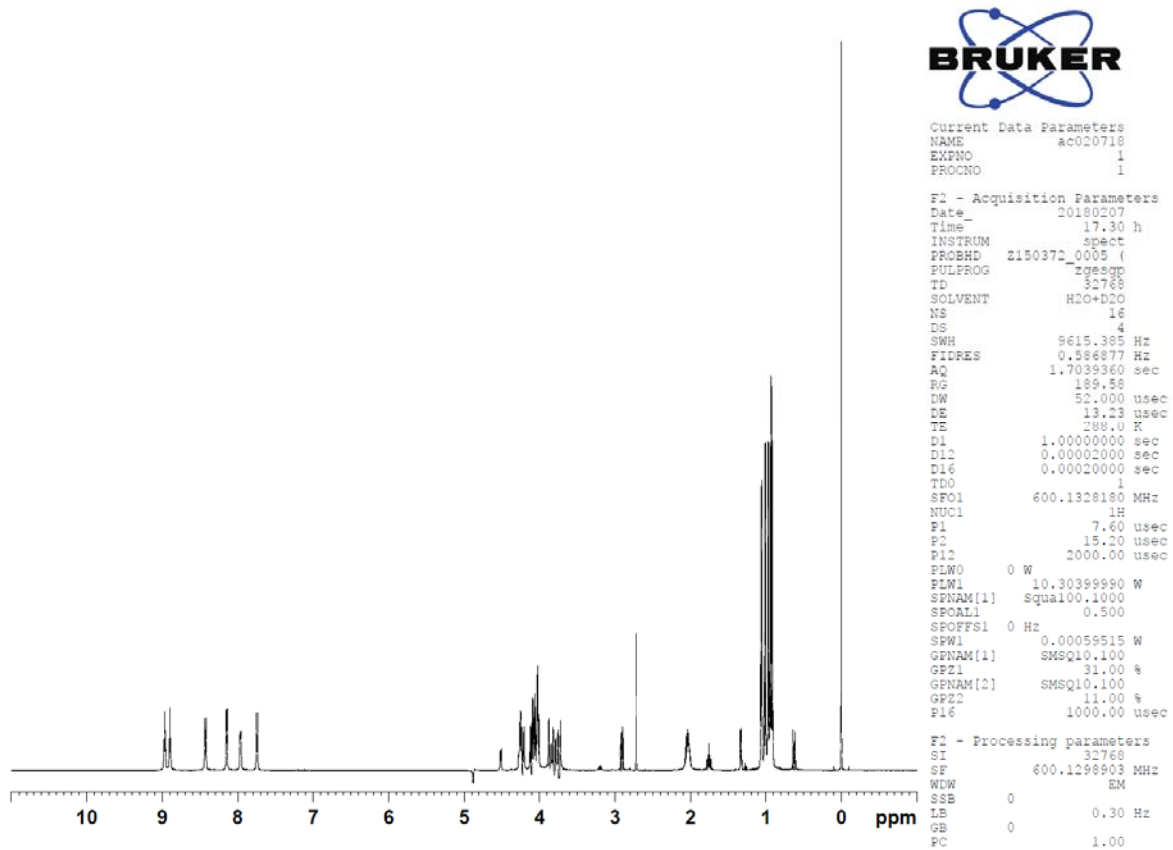

**Figure S9.** Complete  $^1\text{H}$  NMR spectrum of V1T in 90:10  $\text{H}_2\text{O}:\text{D}_2\text{O}$  at 288 K.

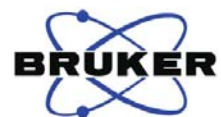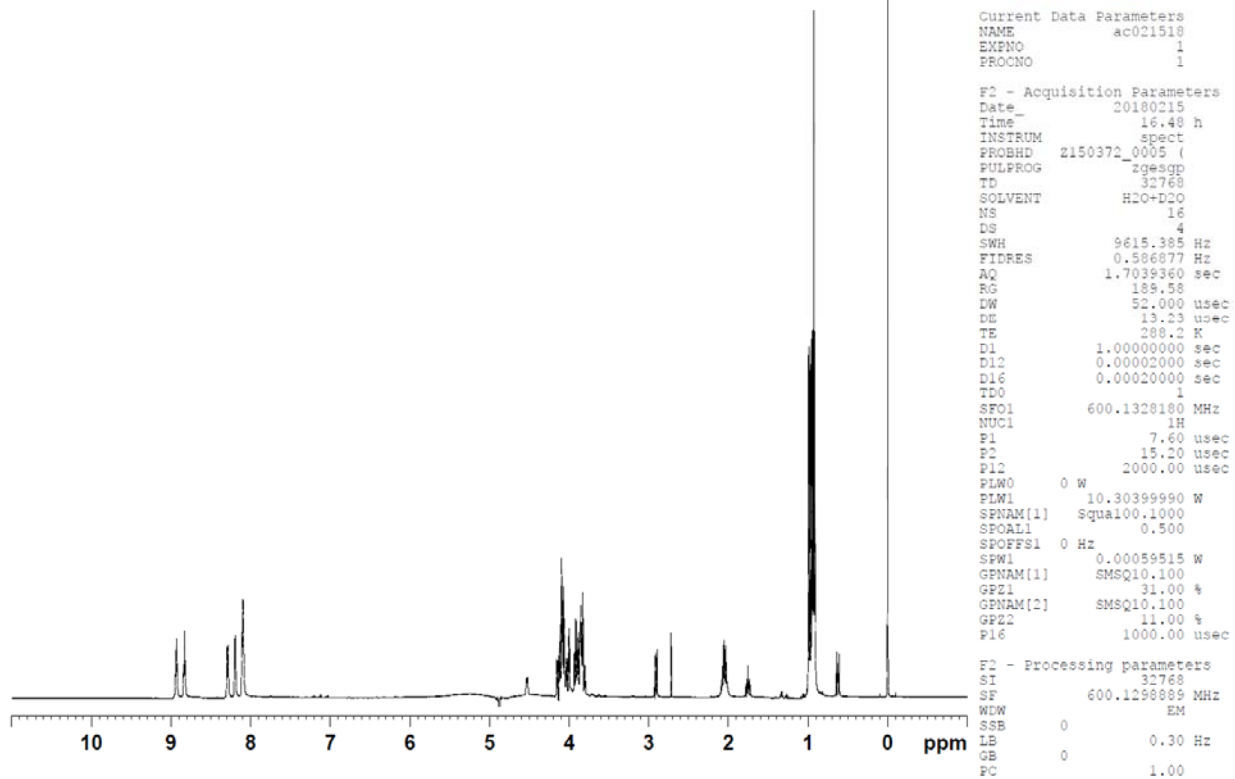

Figure S10. Complete  $^1\text{H}$  NMR spectrum of VIS in 90:10  $\text{H}_2\text{O}:\text{D}_2\text{O}$  at 288 K.

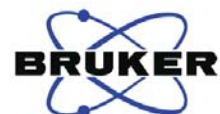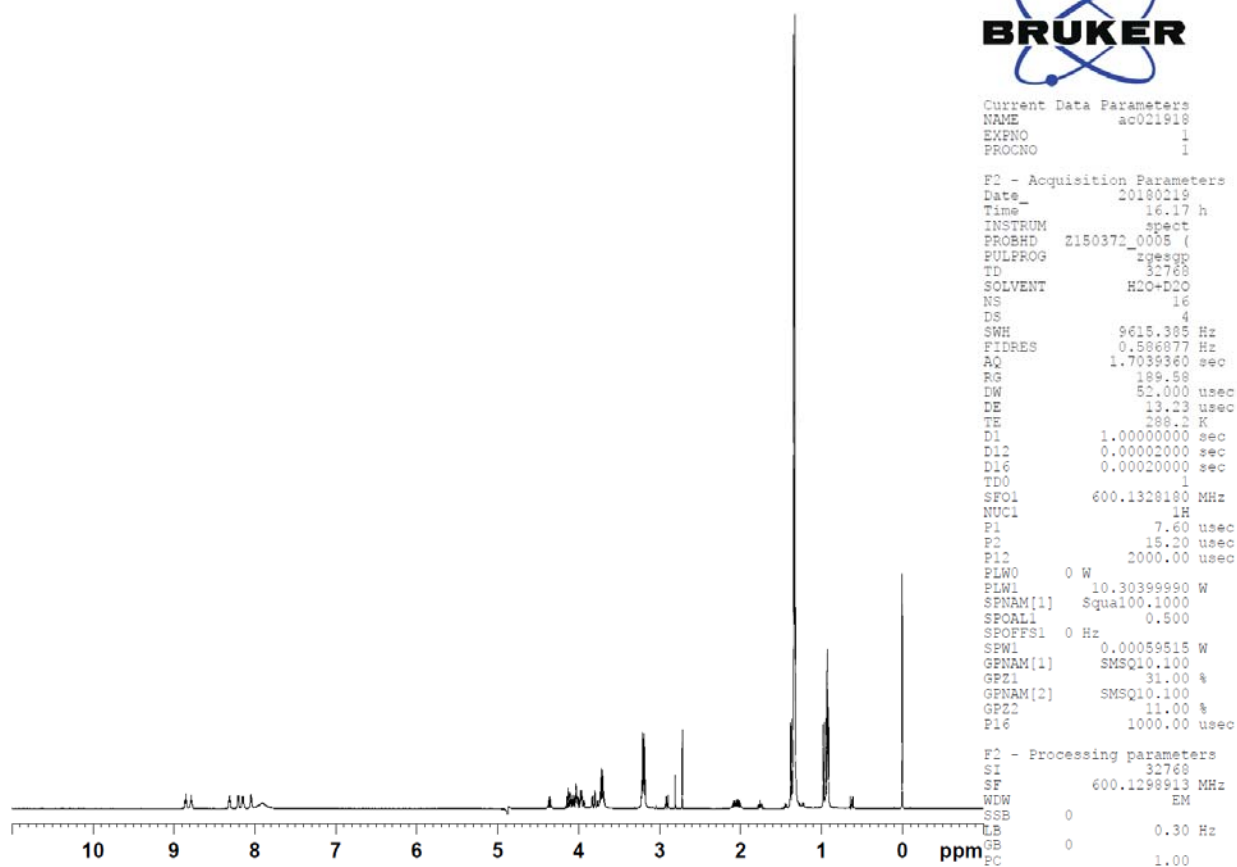

**Figure S11.** Complete  $^1\text{H}$  NMR spectrum of V1A in 90:10  $\text{H}_2\text{O}:\text{D}_2\text{O}$  at 288 K. Despite apparent > 99 % purity via HPLC and LC-MS, unidentified resonances were observed at 1.33 ppm and 7.93 ppm. This did not interfere with analysis of the structural ensemble of V1A.

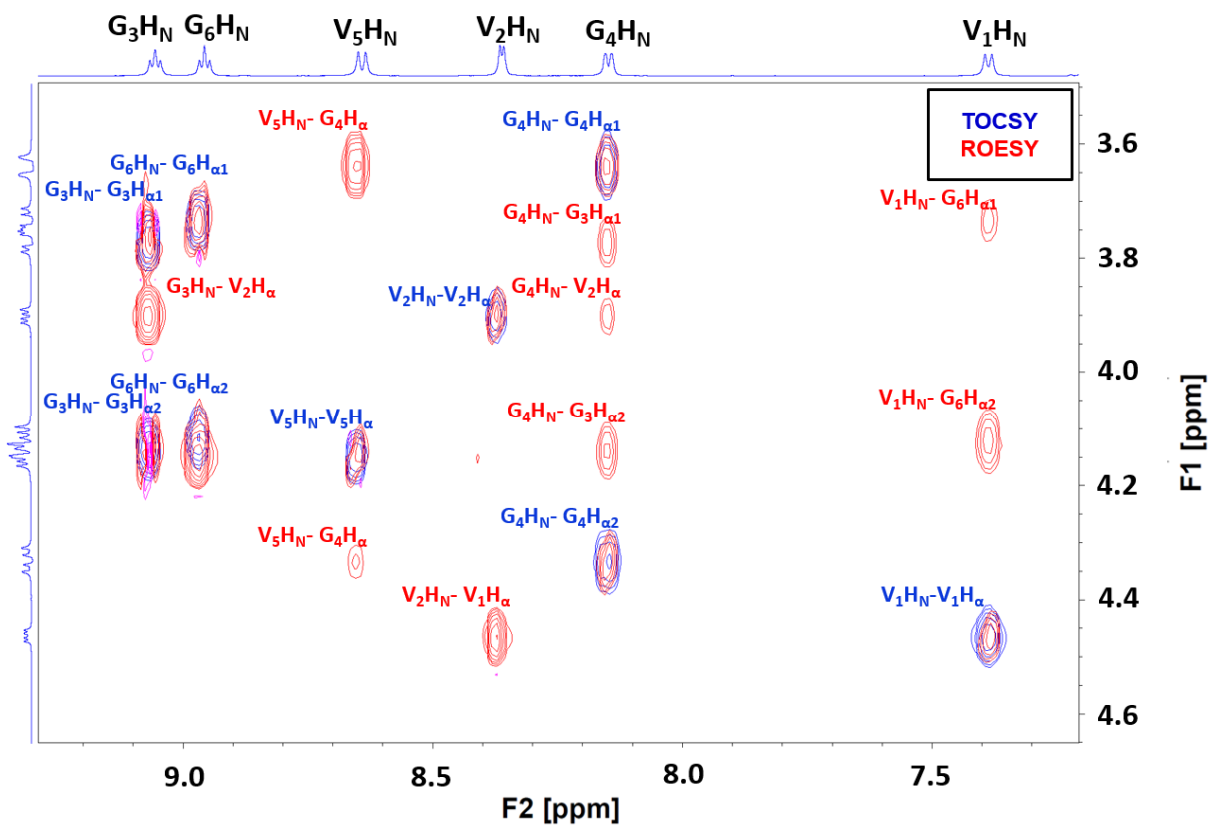

**Figure S12.** Fingerprint region of the 2D spectra for P7 at 288K, with TOCSY peaks shown in blue and ROESY peaks shown in red. 1D spectra correspond to the  $H_N$  region (top) and the  $H_\alpha$  region (side). The peptide was dissolved in 90:10  $H_2O:D_2O$  at a concentration of roughly 3.0 mM.

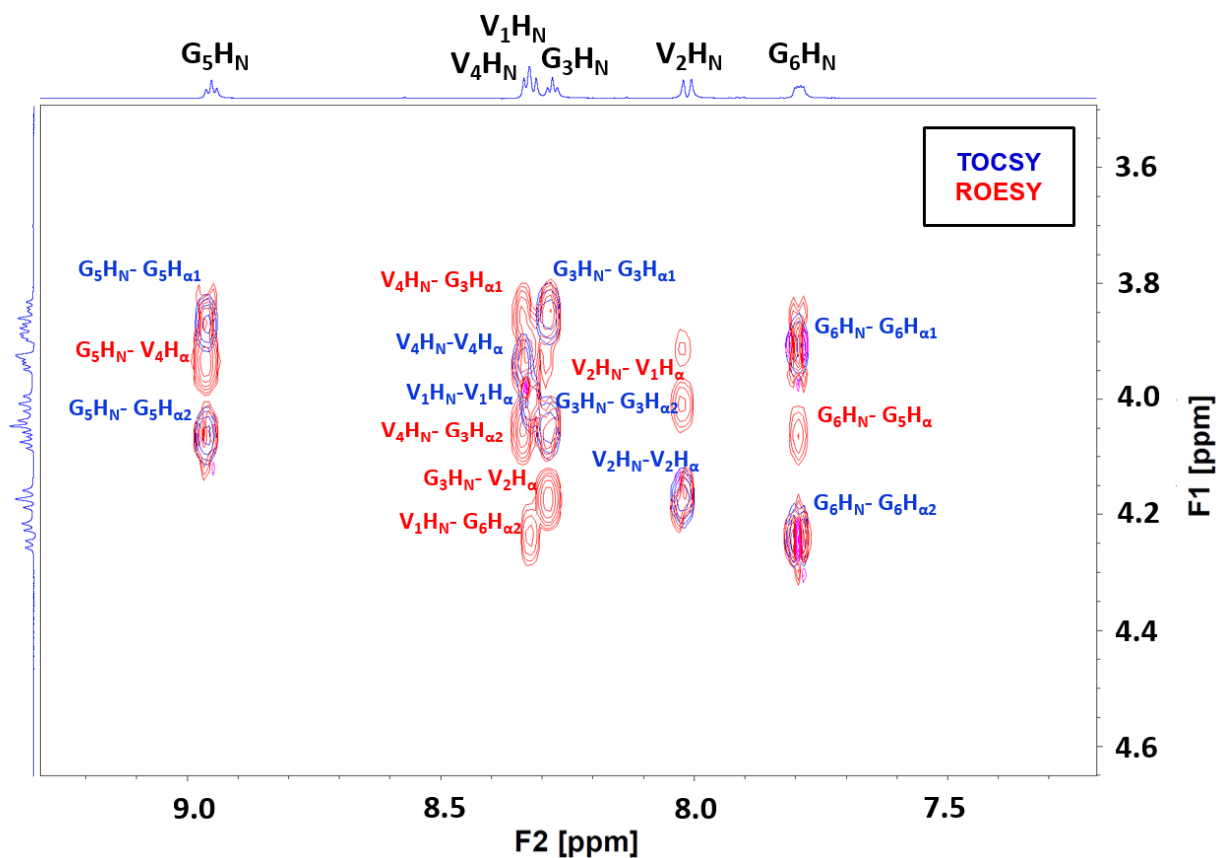

**Figure S13.** Fingerprint region of the 2D spectra for P6 at 288K, with TOCSY peaks shown in blue and ROESY peaks shown in red. 1D spectra correspond to the  $H_N$  region (top) and the  $H_\alpha$  region (side). The peptide was dissolved in 90:10  $H_2O:D_2O$  at a concentration of roughly 3.0 mM.

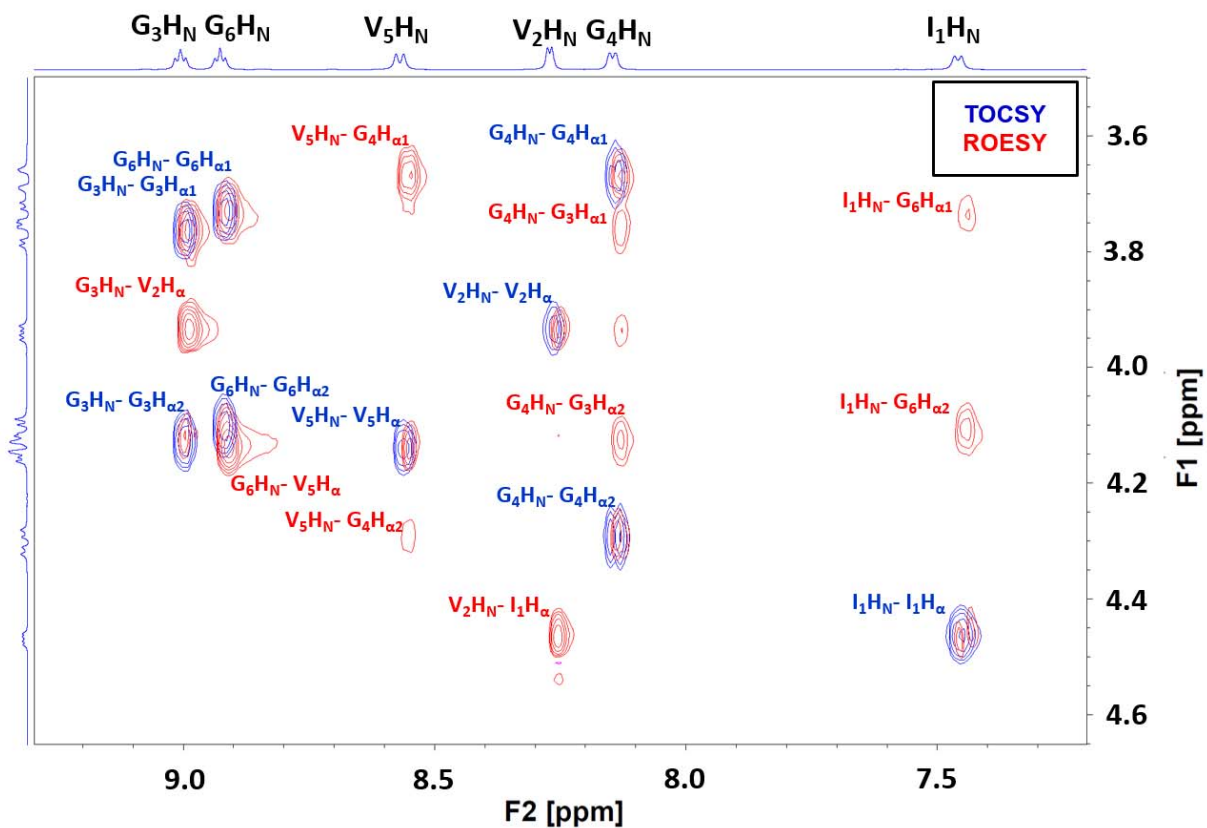

**Figure S14.** Fingerprint region of the 2D spectra for VII at 288K, with TOCSY peaks shown in blue and ROESY peaks shown in red. 1D spectra correspond to the  $H_N$  region (top) and the  $H_\alpha$  region (side). The peptide was dissolved in 90:10  $H_2O:D_2O$  at a concentration of roughly 3.0 mM.

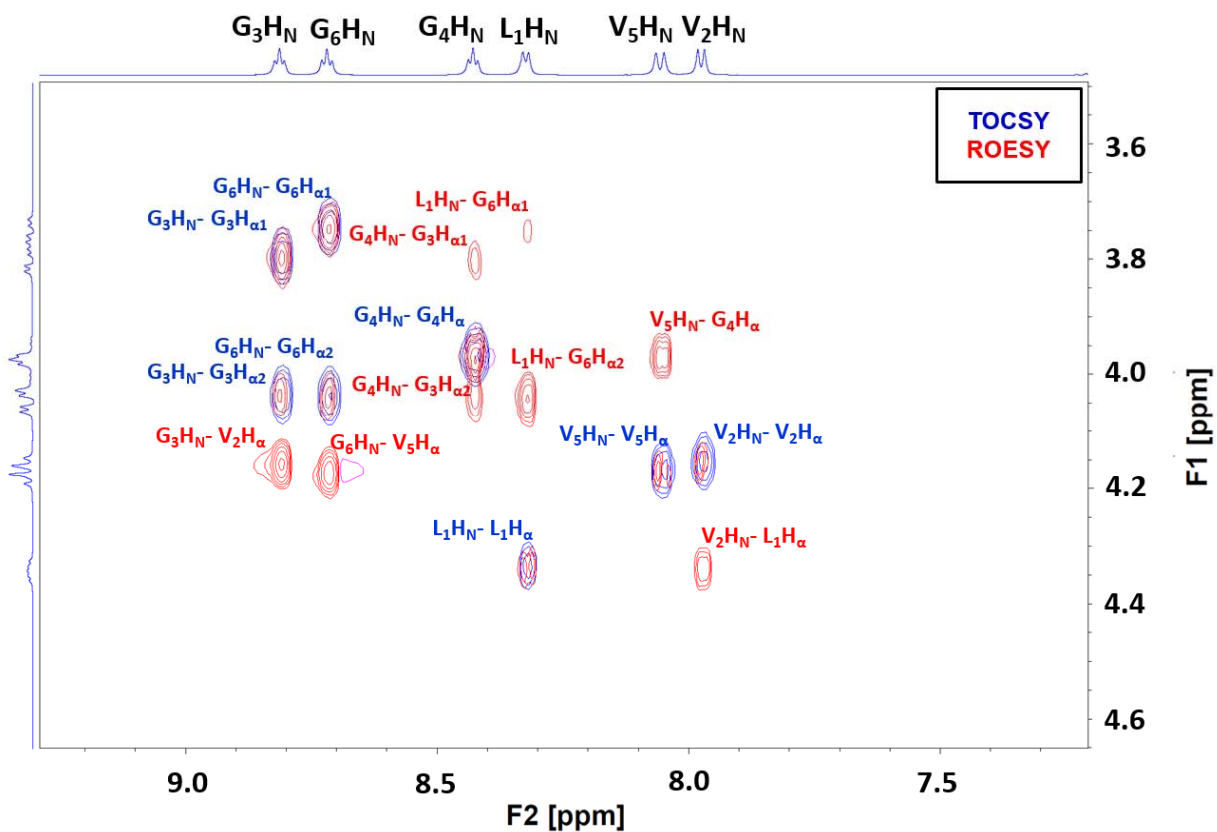

**Figure S15.** Fingerprint region of the 2D spectra for V1L at 288K, with TOCSY peaks shown in blue and ROESY peaks shown in red. 1D spectra correspond to the  $H_N$  region (top) and the  $H_{\alpha}$  region (side). The peptide was dissolved in 90:10  $H_2O:D_2O$  at a concentration of roughly 3.0 mM.



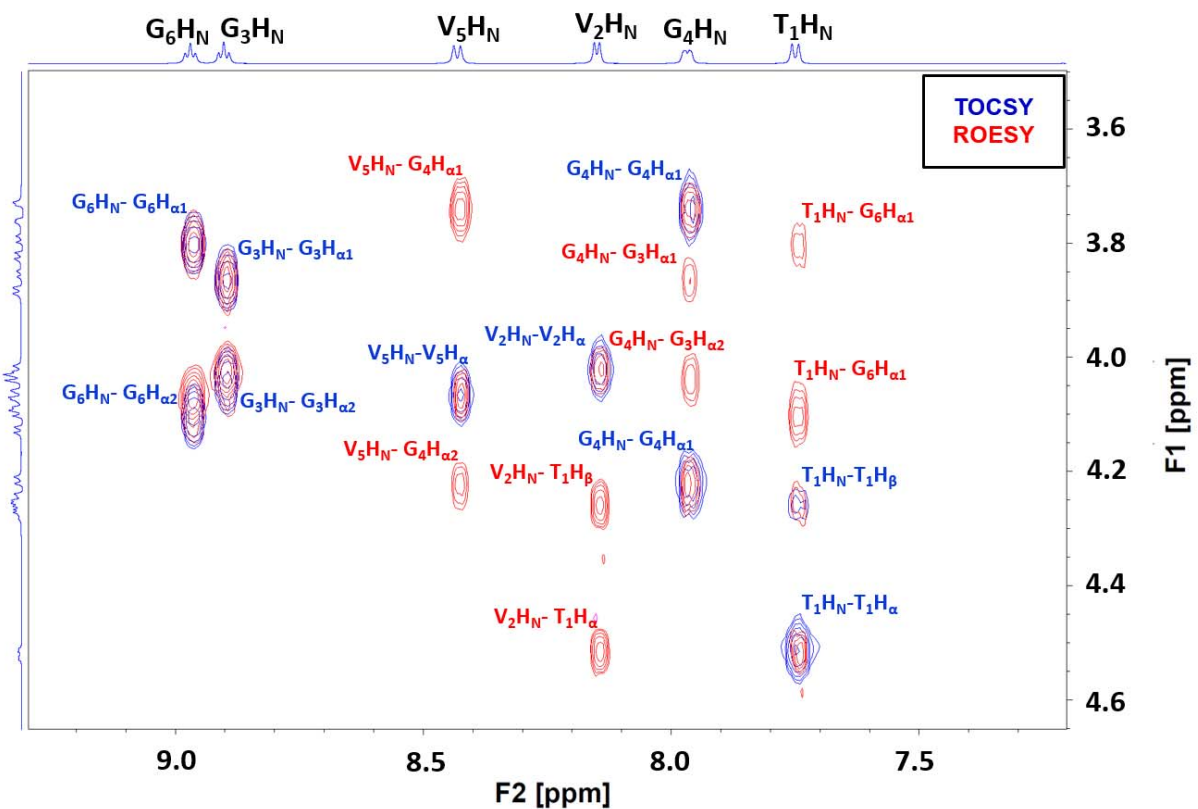

**Figure S16.** Fingerprint region of the 2D spectra for V1T at 288K, with TOCSY peaks shown in blue and ROESY peaks shown in red. 1D spectra correspond to the  $H_N$  region (top) and the  $H_\alpha$  region (side). The peptide was dissolved in 90:10  $H_2O:D_2O$  at a concentration of roughly 3.0 mM.

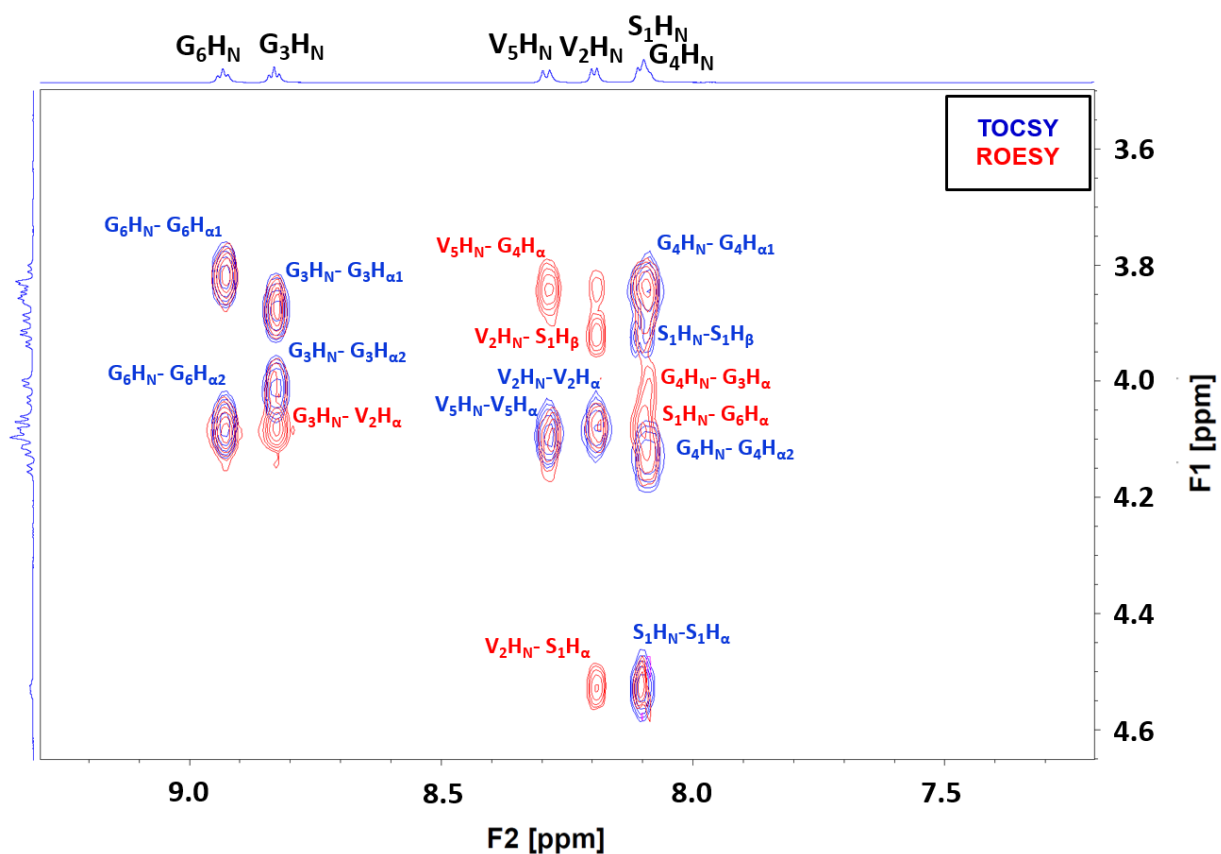

**Figure S17.** Fingerprint region of the 2D spectra for V1S at 288K, with TOCSY peaks shown in blue and ROESY peaks shown in red. 1D spectra correspond to the  $H_N$  region (top) and the  $H_{\alpha}$  region (side). The peptide was dissolved in 90:10  $H_2O:D_2O$  at a concentration of roughly 3.0 mM.

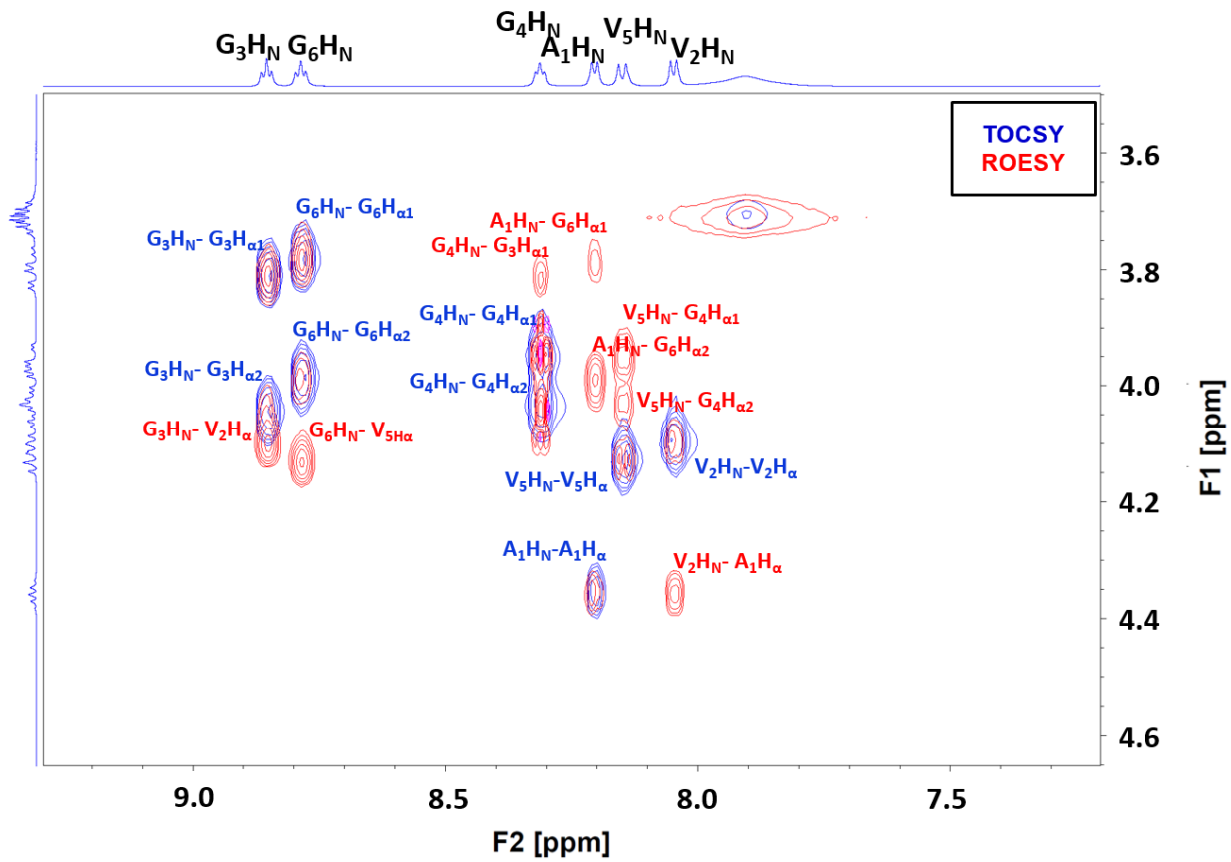

**Figure S18.** Fingerprint region of the 2D spectra for V1A at 288K, with TOCSY peaks shown in blue and ROESY peaks shown in red. 1D spectra correspond to the H<sub>N</sub> region (top) and the H<sub>α</sub> region (side). The peptide was dissolved in 90:10 H<sub>2</sub>O:D<sub>2</sub>O at a concentration of roughly 3.0 mM.

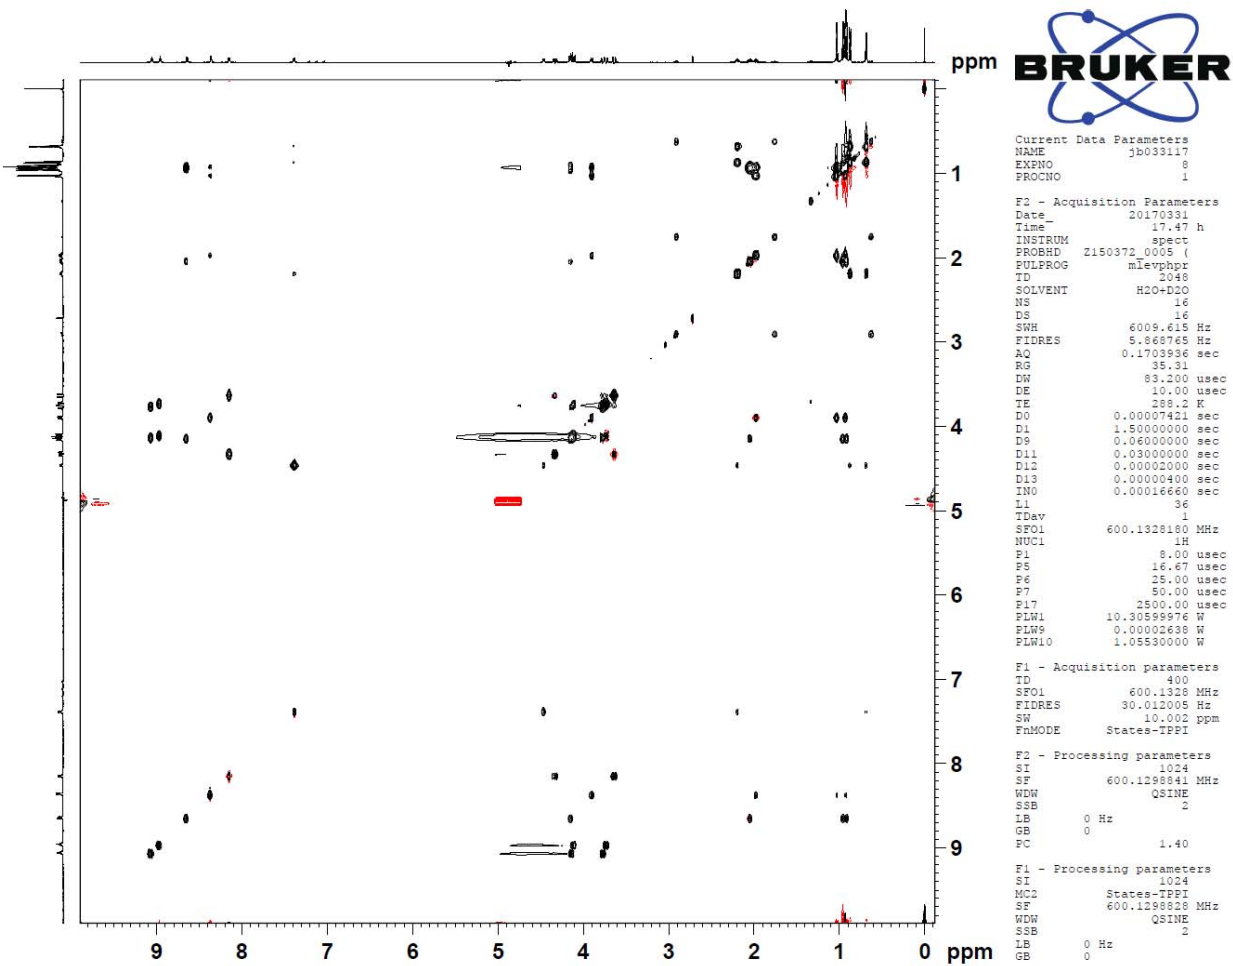

Figure S19. Complete  $^1\text{H}$ - $^1\text{H}$  TOCSY NMR spectrum of P7 in 90:10  $\text{H}_2\text{O}:\text{D}_2\text{O}$  at 288 K.

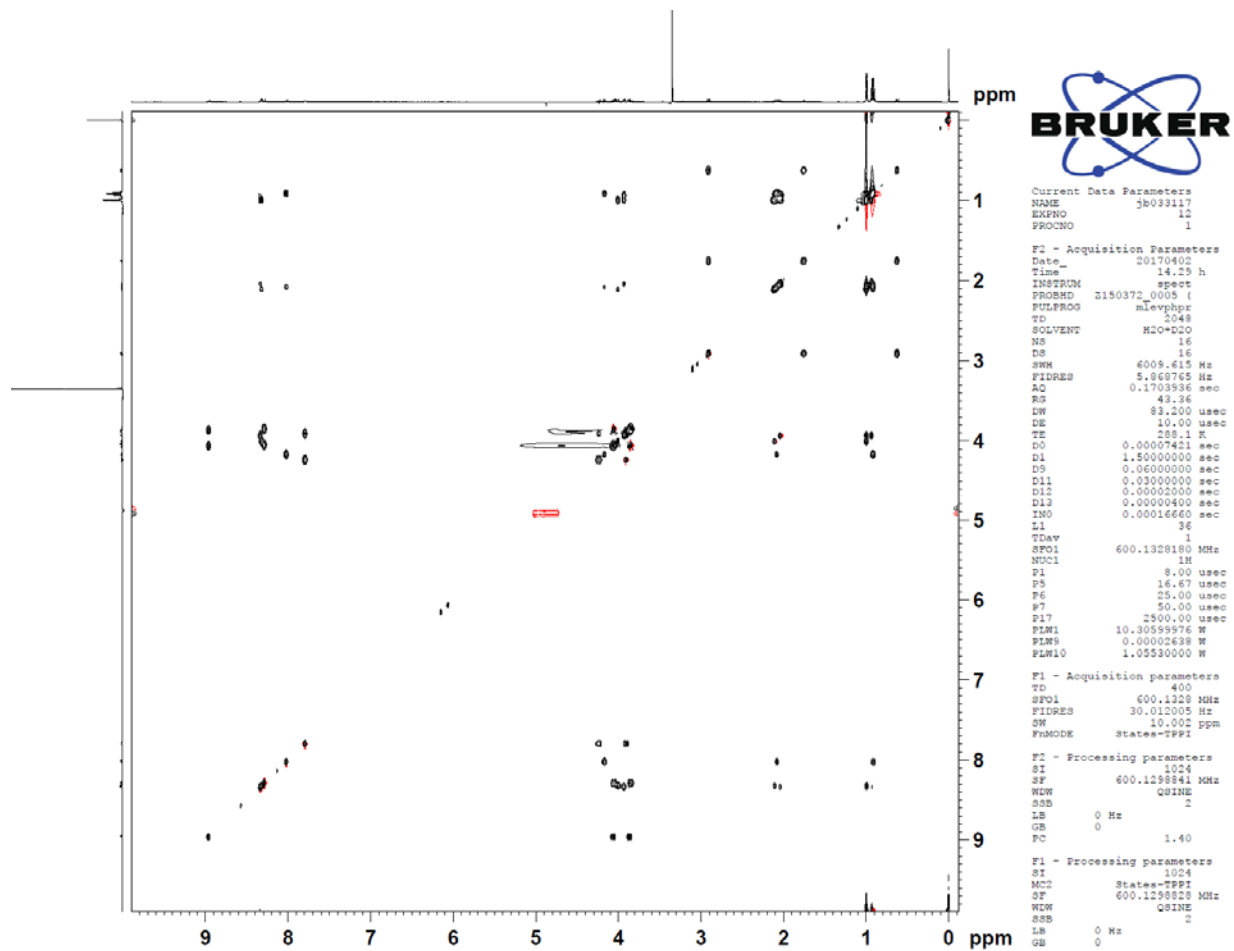

Figure S20. Complete  $^1\text{H}$ - $^1\text{H}$  TOCSY NMR spectrum of P6 in 90:10  $\text{H}_2\text{O}:\text{D}_2\text{O}$  at 288 K.

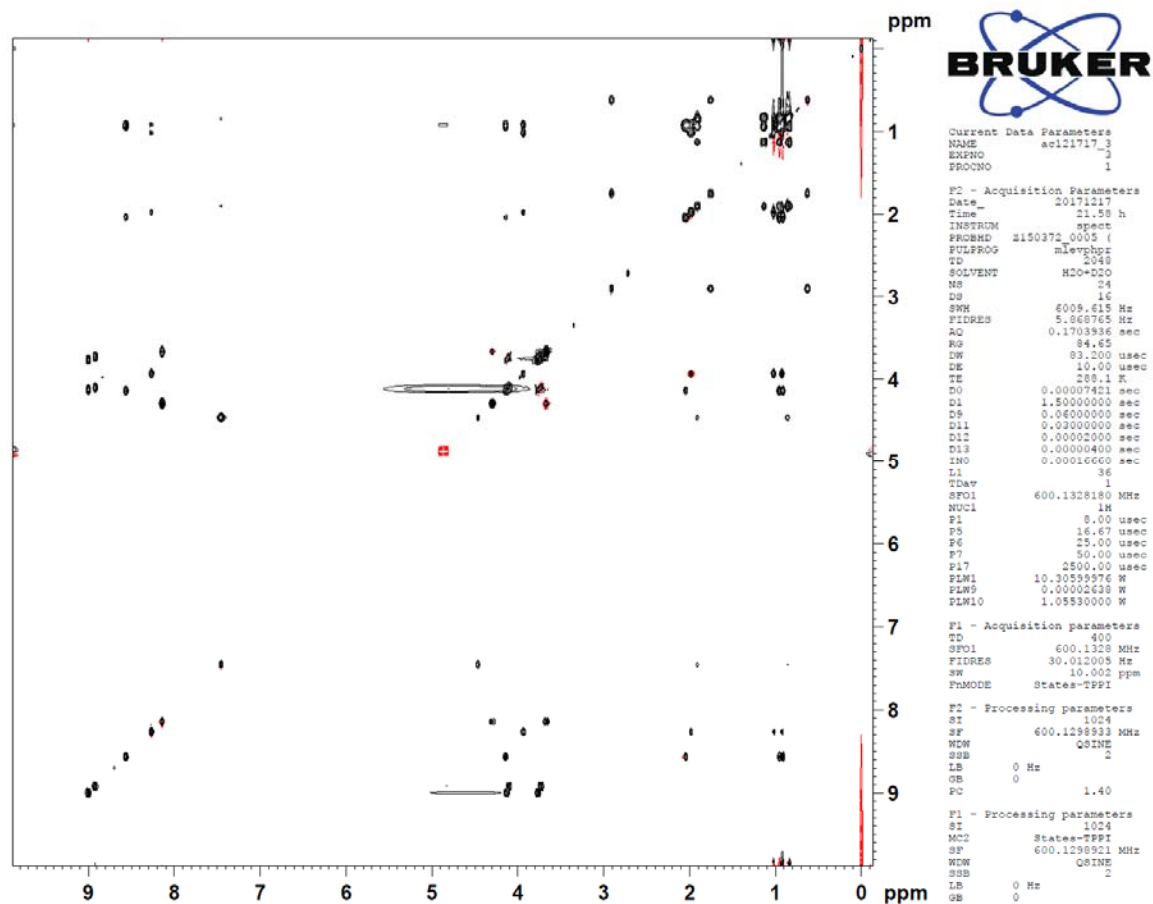

**Figure S21.** Complete  $^1\text{H}$ - $^1\text{H}$  TOCSY NMR spectrum of VII in 90:10  $\text{H}_2\text{O}:\text{D}_2\text{O}$  at 288 K.

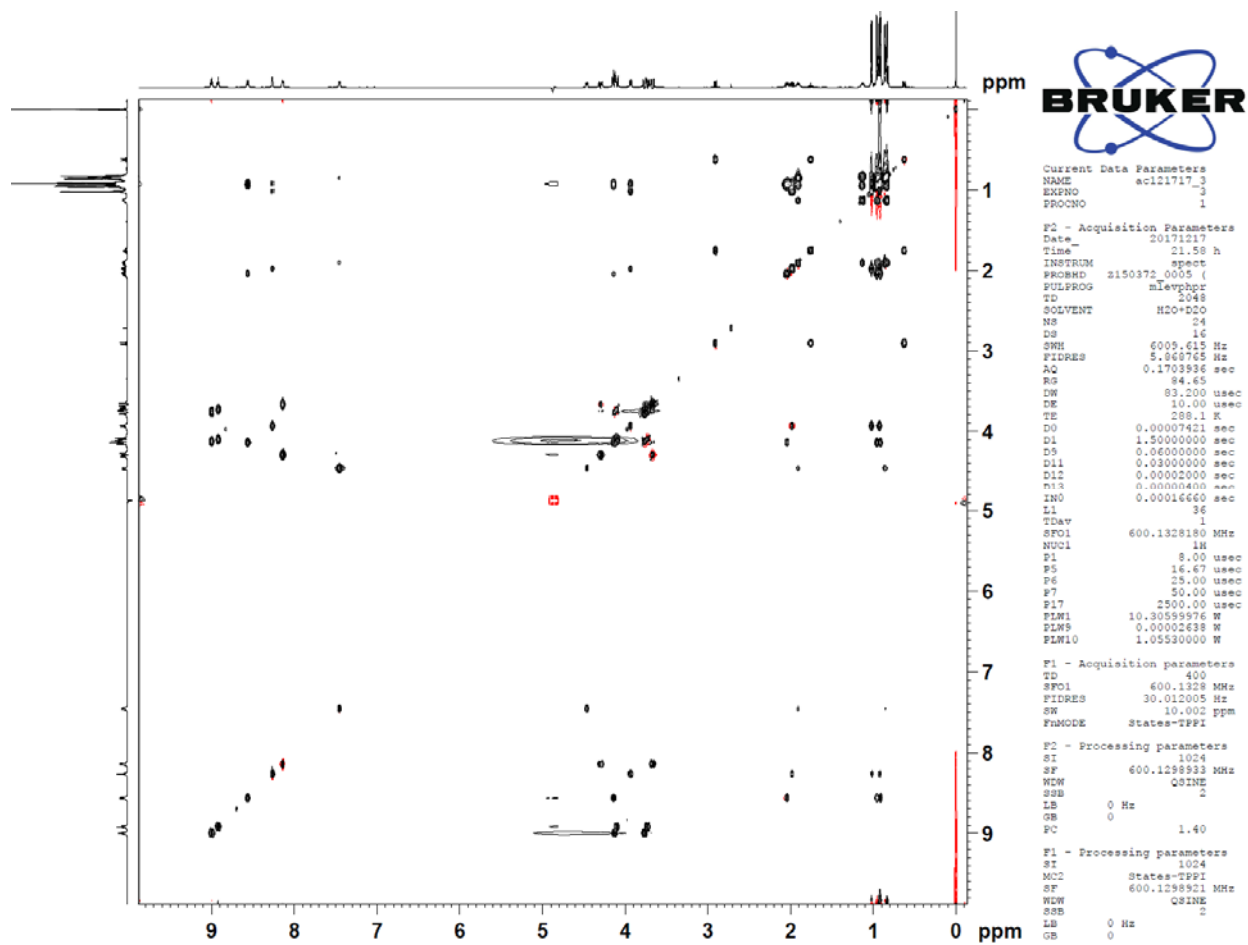

Figure S22. Complete  $^1\text{H}$ - $^1\text{H}$  TOCSY NMR spectrum of VIL in 90:10  $\text{H}_2\text{O}:\text{D}_2\text{O}$  at 288 K.

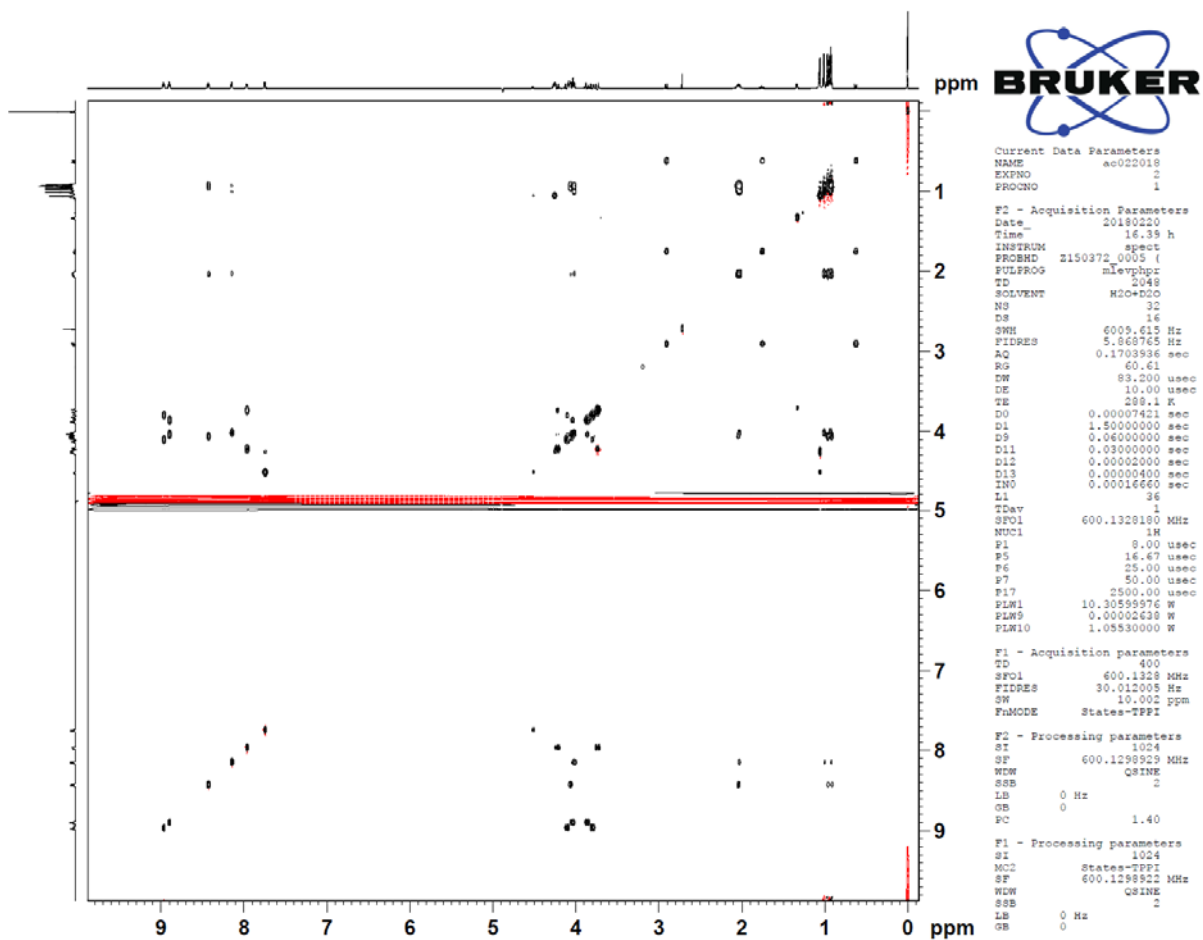

**Figure S23.** Complete  $^1\text{H}$ - $^1\text{H}$  TOCSY NMR spectrum of VIT in 90:10  $\text{H}_2\text{O}:\text{D}_2\text{O}$  at 288 K.



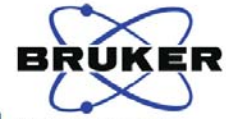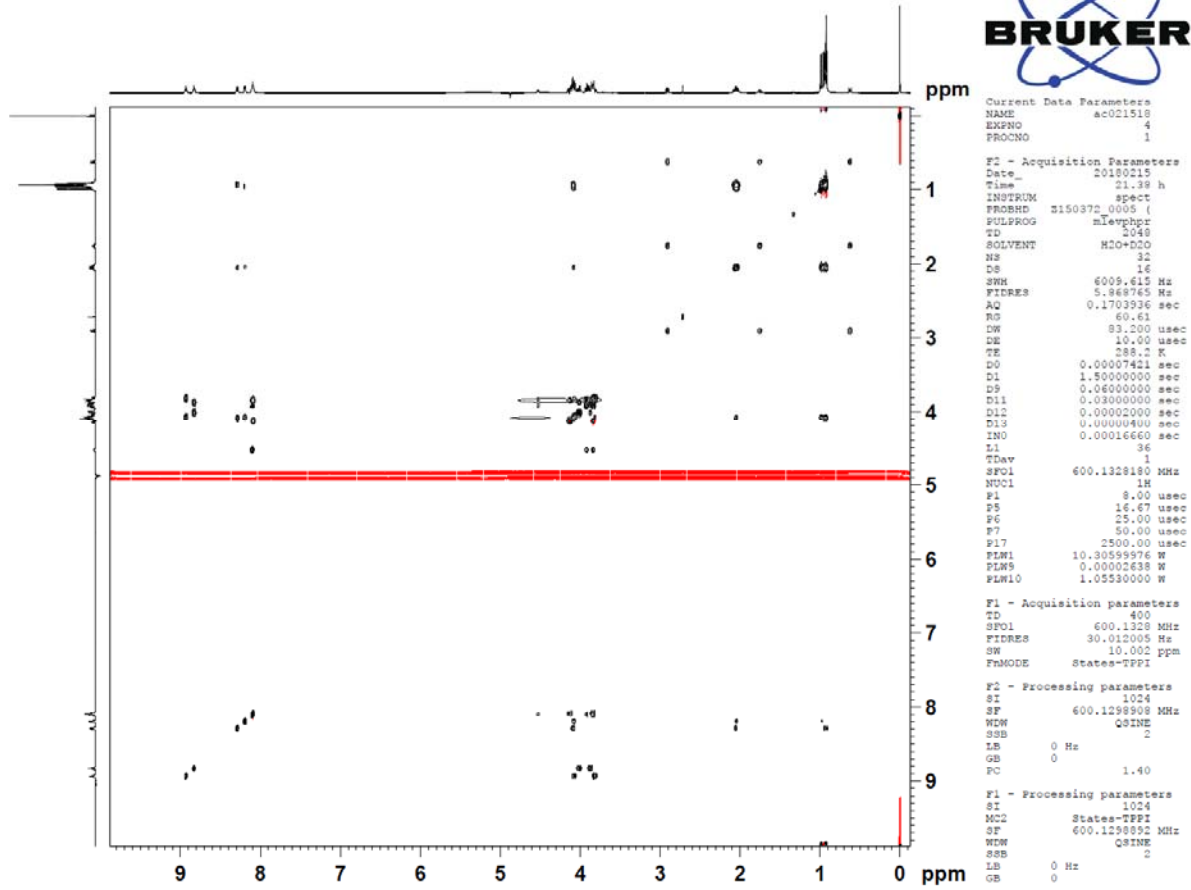

Figure S24. Complete  $^1\text{H}$ - $^1\text{H}$  TOCSY NMR spectrum of V1S in 90:10  $\text{H}_2\text{O}:\text{D}_2\text{O}$  at 288 K.

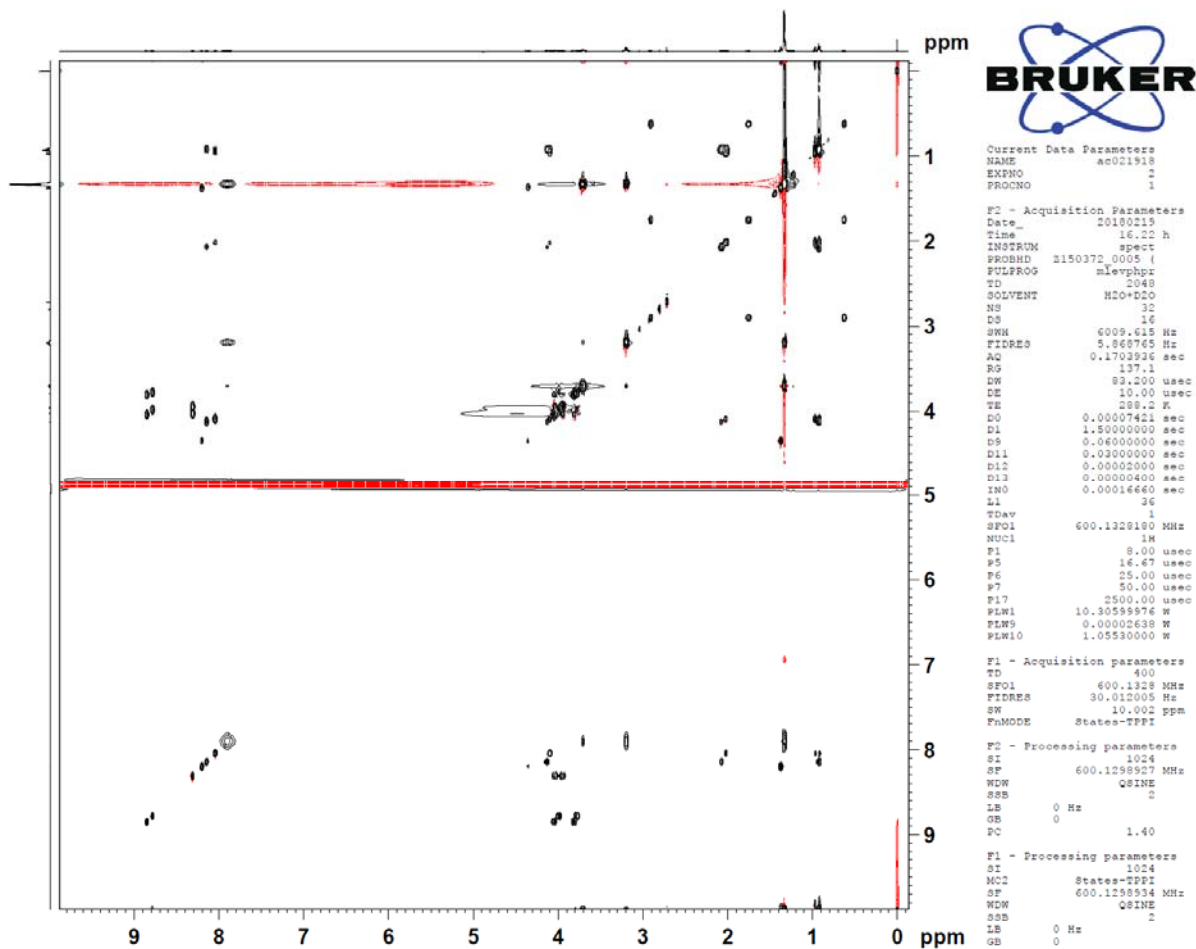

Figure S25. Complete  $^1\text{H}$ - $^1\text{H}$  TOCSY NMR spectrum of V1A in 90:10  $\text{H}_2\text{O}:\text{D}_2\text{O}$  at 288 K.

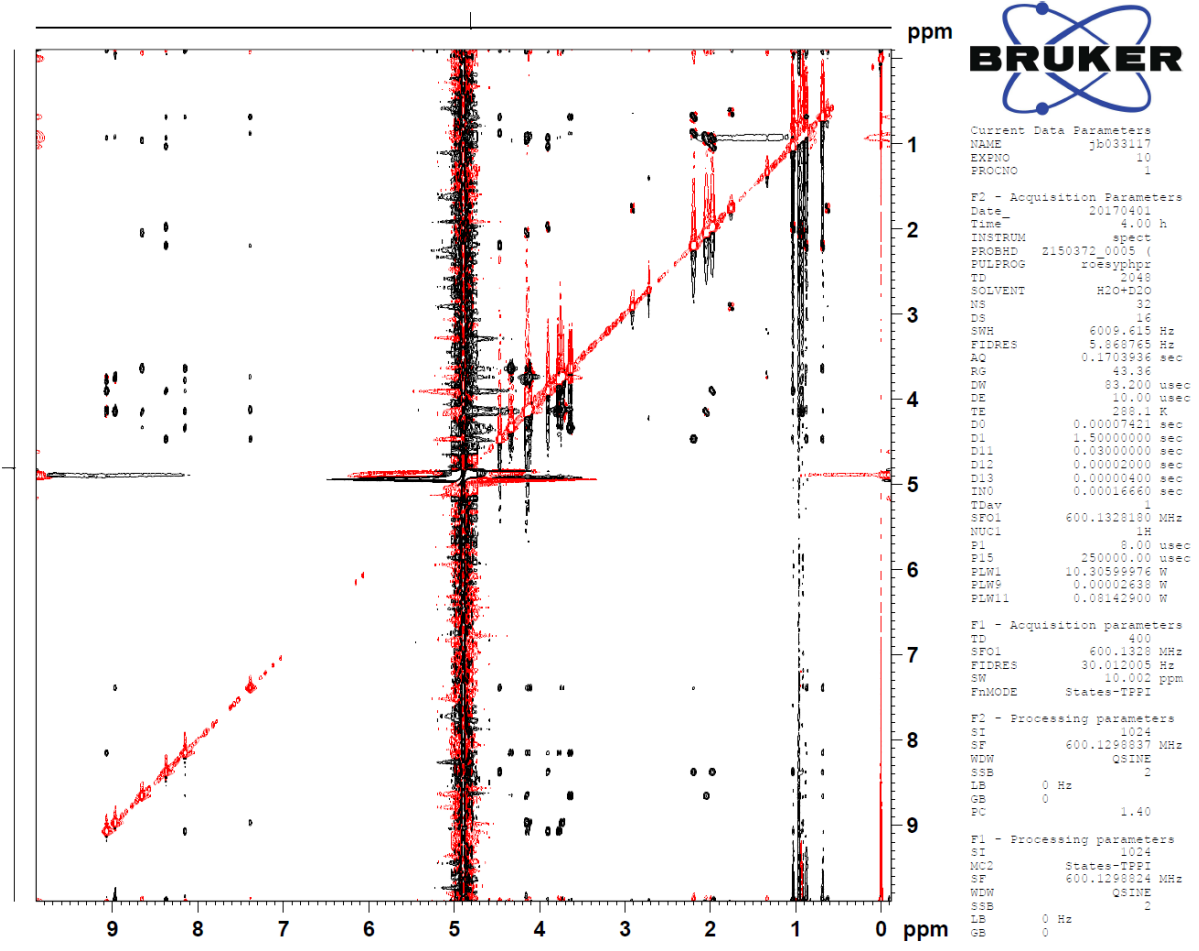

Figure S26. Complete  $^1\text{H}$ - $^1\text{H}$  ROESY NMR spectrum of P7 in 90:10  $\text{H}_2\text{O}:\text{D}_2\text{O}$  at 288 K.

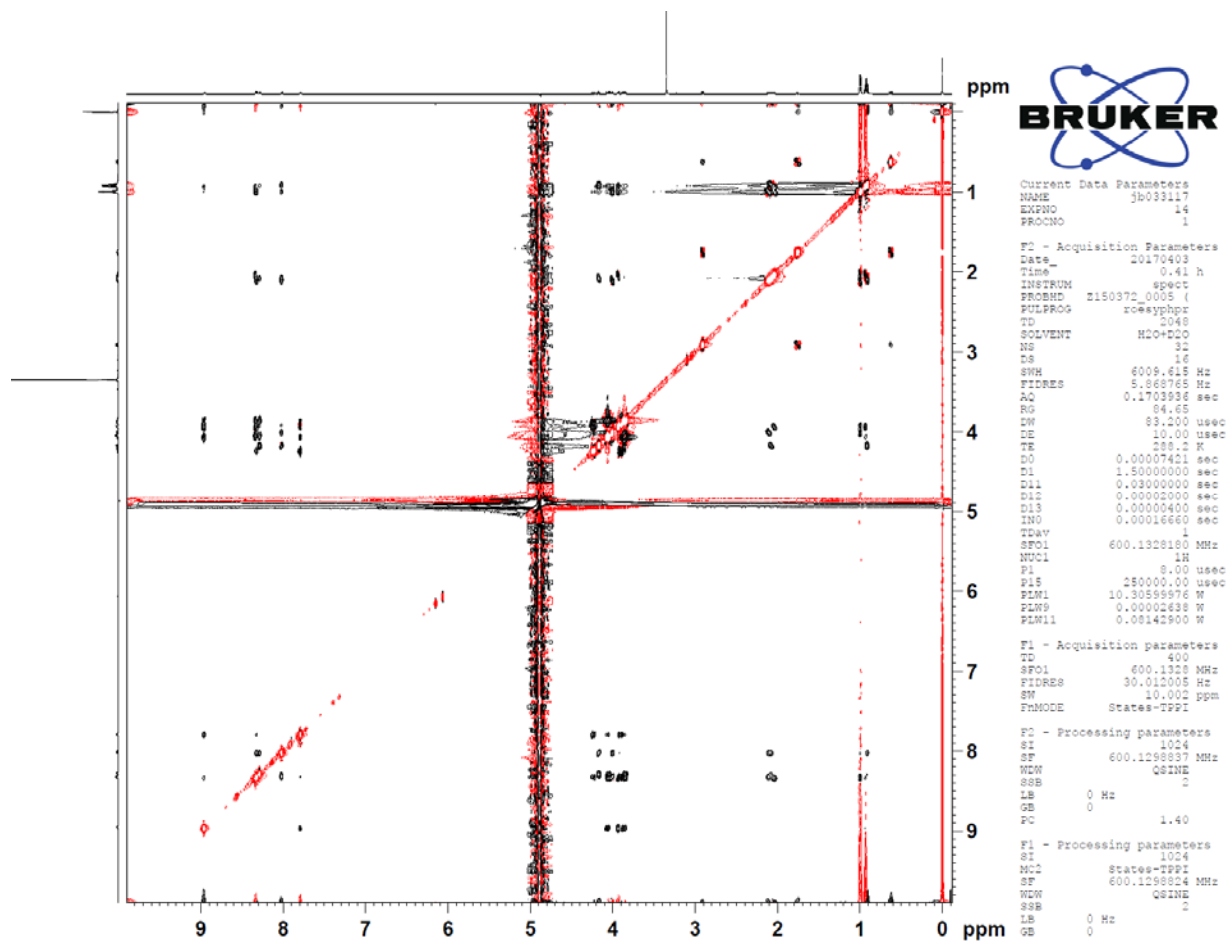

Figure S27. Complete  $^1\text{H}$ - $^1\text{H}$  ROESY NMR spectrum of P6 in 90:10  $\text{H}_2\text{O}:\text{D}_2\text{O}$  at 288 K.

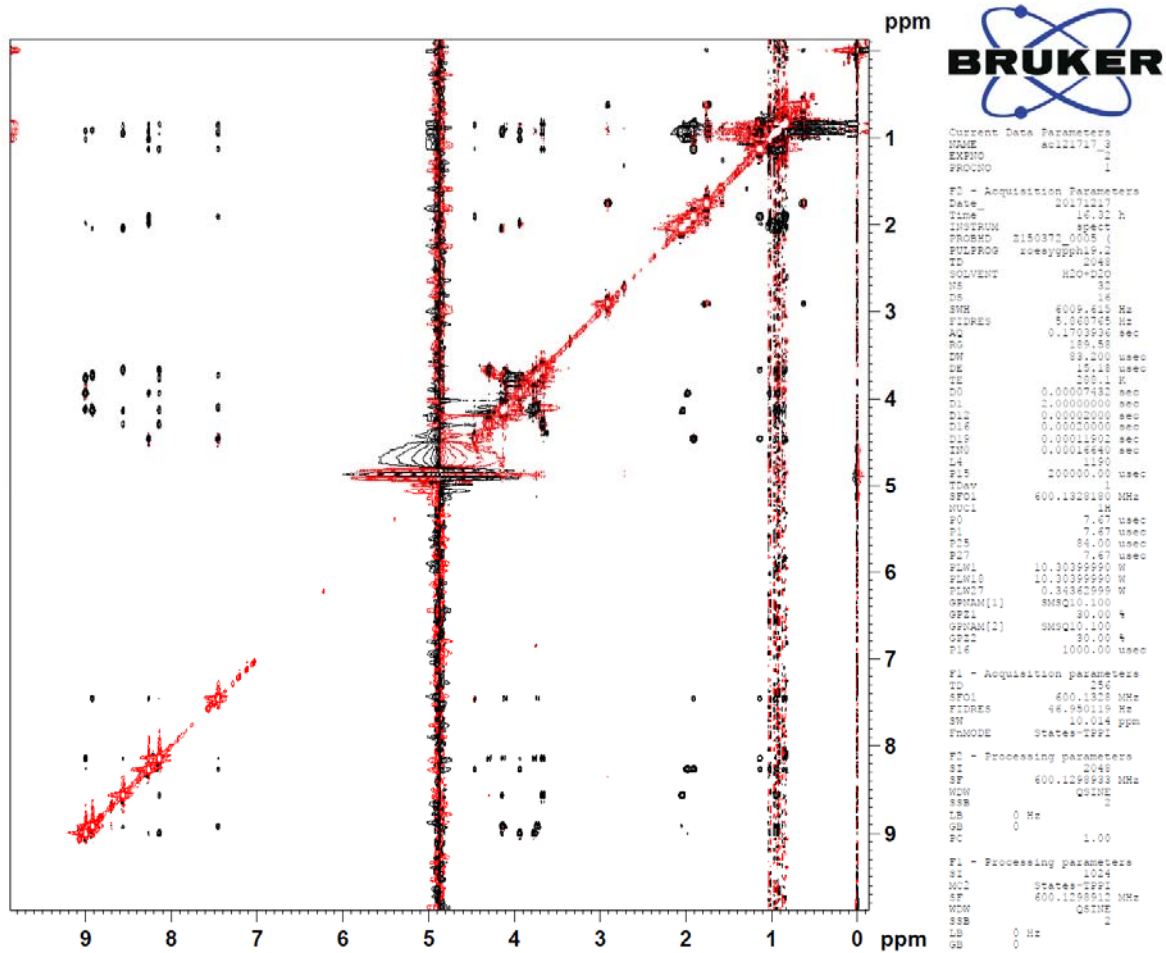

Figure S28. Complete  $^1\text{H}$ - $^1\text{H}$  ROESY NMR spectrum of V11 in 90:10  $\text{H}_2\text{O}:\text{D}_2\text{O}$  at 288 K.

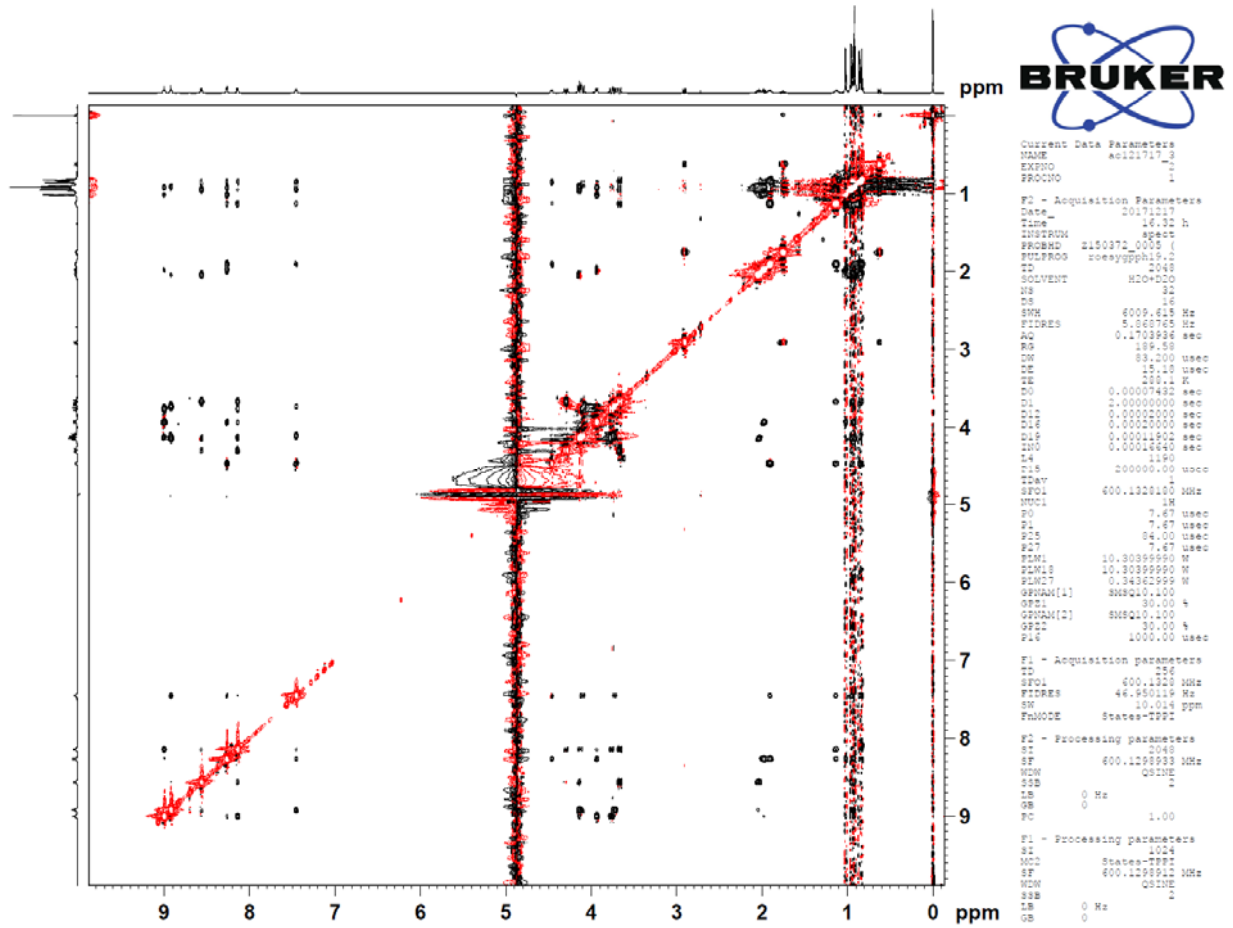

Figure S29. Complete  $^1\text{H}$ - $^1\text{H}$  ROESY NMR spectrum of VIL in 90:10  $\text{H}_2\text{O}:\text{D}_2\text{O}$  at 288 K.

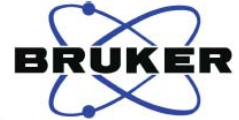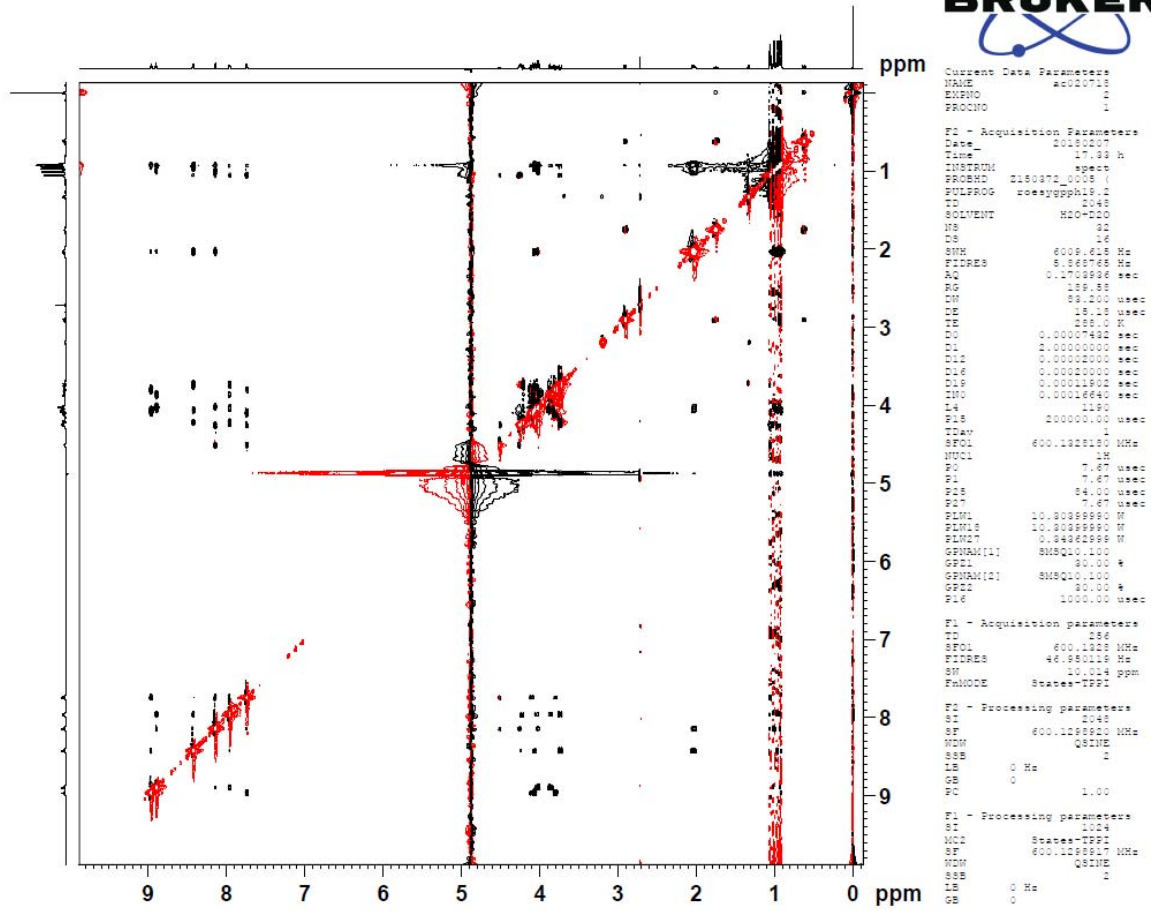

Figure S30. Complete  $^1\text{H}$ - $^1\text{H}$  ROESY NMR spectrum of V1T in 90:10  $\text{H}_2\text{O}:\text{D}_2\text{O}$  at 288 K.

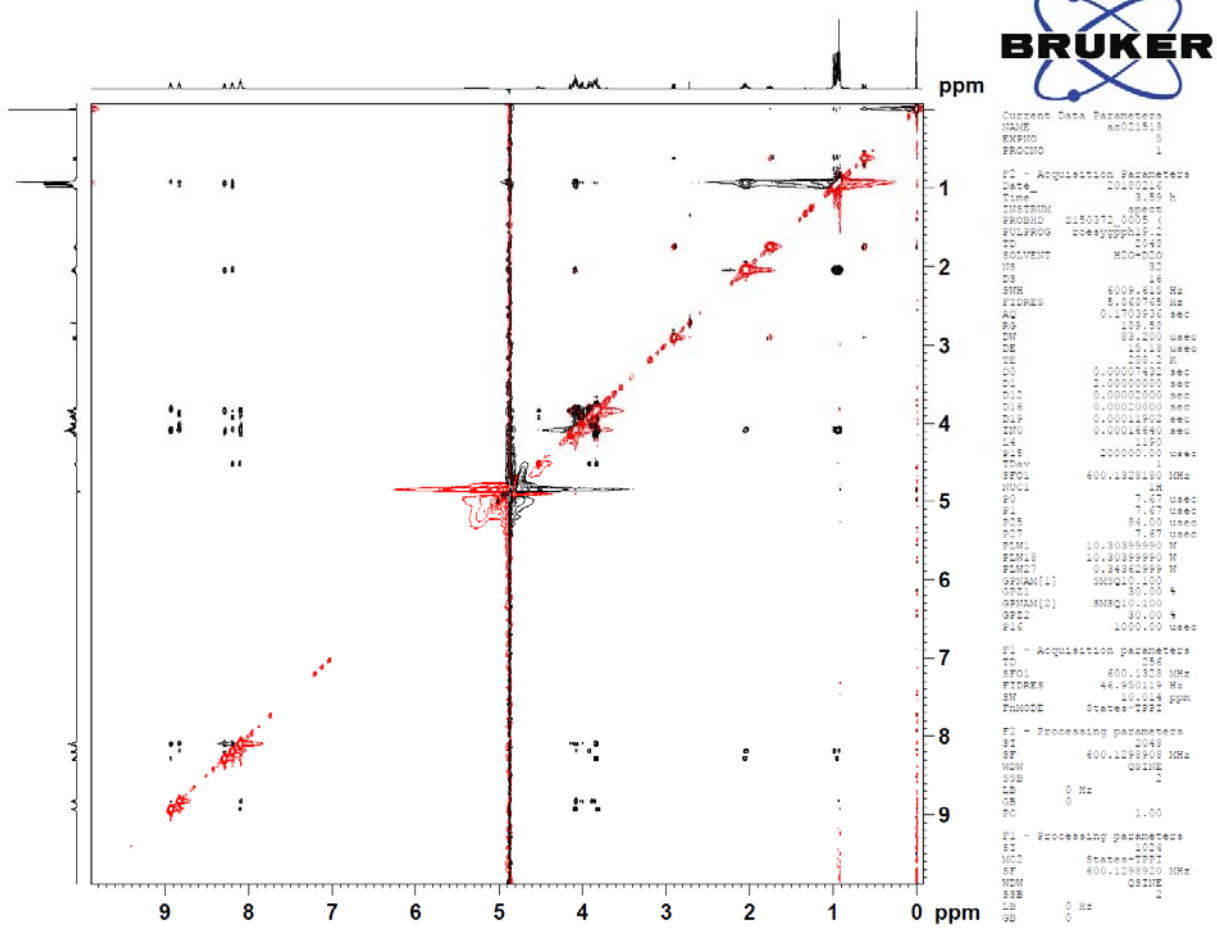

Figure S31. Complete  $^1\text{H}$ - $^1\text{H}$  ROESY NMR spectrum of V1S in 90:10  $\text{H}_2\text{O}:\text{D}_2\text{O}$  at 288 K.



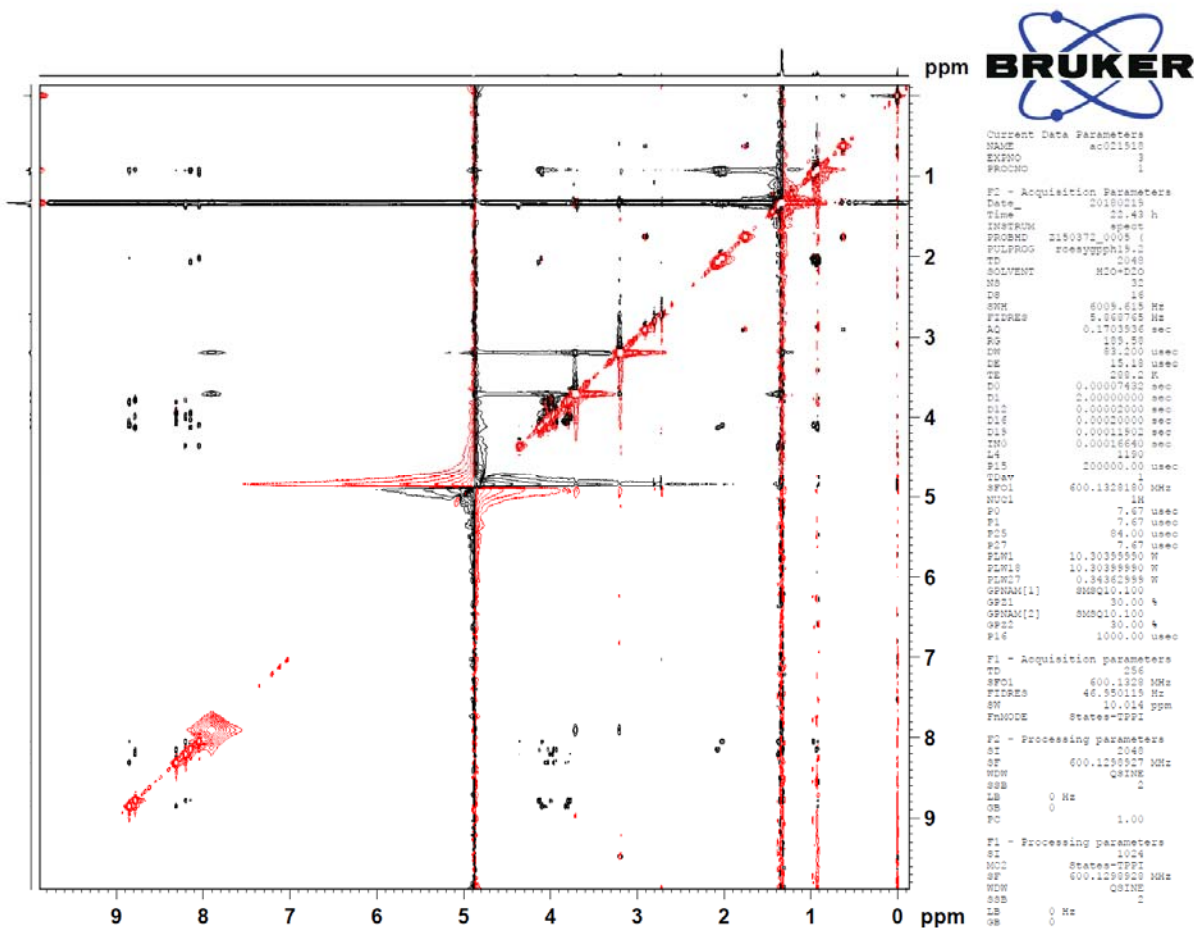

Figure S32. Complete  $^1\text{H}$ - $^1\text{H}$  ROESY NMR spectrum of V1A in 90:10  $\text{H}_2\text{O}:\text{D}_2\text{O}$  at 288 K.

### References

1. Brünger, A. T., P. D. Adams, G. M. Clore, W. L. DeLano, P. Gros, R. W. Grosse-Kunstleve, J. S. Jiang, J. Kuszewski, M. Nilges, N. S. Pannu, R. J. Read, L. M. Rice, T. Simonson, G. L. Warren. 1998. A new software suite for macromolecular structure determination. *Acta Cryst. D* 54:905-921.
2. Brunger, A. T. 2007. Version 1.2 of the crystallography and NMR system. *Nat. Protoc.* 2:2728-2733.
